# Supplementary material for: Enzyme-free temperature resilient amplification assay with toehold stem-loop probe
Source: Royal Society of Chemistry journal article supplement (doi:10.1039/d4an01212g), 2025-01-01
Supplement: d4an01212g2.xlsx [file d4an01212g2.xlsx]

## Sheet: Figure 1B
Time (Minutes)	M_B.1.617.2_0 (Probe 1)			ORF1a_B.1.617.2_0 (Probe 2)			ORF1a_B.1.617.2_9 (Probe 3)			ORF1a_B.1.617.2_3 (Probe 4)			ORF8_B.1.617.2_0 (Probe 5)			ORF8_B.1.617.2_12 (Probe 6)			S_B.1.617.2_0 (Probe 7)
0	4961	1817	-176	57694	48902	51162	4700	1999	-9667	11044	9482	15150	15117	28352	18461	4564	-3925	1574	17964	16914	16367
2	1575	7901	4661	85371	68519	75707	11683	2144	6647	14575	14291	6338	36391	43518	35224	17488	7307	17062	31649	38116	43099
4	7711	6626	1788	111886	98779	100579	18263	5296	8276	26514	18686	22547	58870	52721	39045	19261	4057	23661	58052	54867	47955
6	6988	10098	10311	140121	124033	122254	7607	2099	-4582	24735	30102	35534	56061	47811	57525	20235	15660	26961	71304	69287	72198
8	6567	10934	13979	154422	144799	145597	13471	5359	9855	29841	33281	26679	69841	65436	64394	33268	18092	25240	87142	79125	75074
10	7009	14132	13498	167836	162261	161407	23537	15753	11465	27426	26062	33818	72446	62517	69671	28478	14966	38109	92838	86237	92880
12	13760	12285	11121	189245	177561	170742	15951	12510	15468	34934	33326	37863	78773	71458	78301	30949	22164	44674	107878	103274	93763
14	14817	15504	12365	199402	190849	184652	21306	20416	12736	35640	44279	36175	87238	82879	90914	39603	31882	35084	109746	108358	110997
16	18351	10903	5511	213538	202490	194580	25997	24632	9517	46400	39852	39785	94675	86650	90955	36418	33514	34938	121192	115028	127179
18	14209	16033	13271	220623	207248	206938	27175	21194	13212	42735	38513	38524	108161	101733	98608	39121	37940	48370	121319	123322	120248
20	12765	9556	17222	225798	214822	204885	23565	23807	21438	35122	37630	47511	101239	99581	95091	38077	37662	38058	126811	127381	126379
22	5928	13399	16628	227421	220321	213636	17968	17193	21623	40194	36000	40497	117912	112977	102553	55205	43075	58082	140252	127270	133625
24	20594	12905	11027	234739	220235	218875	14253	20012	12976	53447	46715	48037	128141	112708	106017	47137	33513	70345	158284	141325	135034
26	14840	22137	19315	241925	230513	220212	24953	32604	26448	44799	35453	43513	128751	124303	114391	54351	48867	61952	152898	137500	155165
28	19159	19050	21093	241102	228741	227062	24910	30829	16092	41255	43358	50031	135195	119784	126175	67014	35419	56584	159008	140194	147995
30	24291	19534	24935	244232	236569	226851	21144	28562	20954	53297	42564	46717	140109	130760	121398	64741	53063	66992	169853	162298	166907
32	23382	6261	19001	249211	238639	228570	26653	34878	24211	50062	47987	46650	138912	132058	120172	59670	38297	55966	158603	163892	166899
34	26506	14453	22069	251456	239948	229011	36558	25670	20687	53961	55426	51591	134411	130218	132662	58277	49731	60238	170823	178665	169752
36	24461	17043	23195	255549	240909	239482	31795	27293	36059	56343	49327	49205	141791	142271	128541	57885	37742	62811	190035	177768	182393
38	17591	36768	17577	251964	237902	235060	37989	33263	26905	58407	49636	62899	161105	132240	146273	55329	54053	71495	177891	171743	177607
40	29636	22777	15989	260113	245199	238305	44516	20612	23244	57339	57843	53205	162494	138495	140851	60299	64048	56844	185010	182481	166737
42	20878	22605	21059	262160	247026	241370	42732	29612	32302	53763	56822	45863	145371	150936	143793	59907	61089	61685	191886	186178	194688
44	29642	19153	20132	258178	242656	235956	37597	36656	33014	59085	48592	53436	151756	149234	129840	65605	50184	52153	192011	188471	186079
46	23756	19514	19850	263848	247001	246095	38200	34165	18208	59889	58012	66670	163154	153375	147191	63709	53245	76576	206039	196329	207390
48	19541	30077	27037	260280	253968	241049	33269	33950	32106	59731	49107	58792	172927	157111	142851	69095	51642	81509	194092	213716	182613
50	31251	23270	22537	270714	255942	240673	29637	43815	26352	66814	56473	66090	173736	157524	142911	67043	59418	59055	199120	214883	190351
52	26782	22465	28201	268932	245258	237920	37192	27185	27054	53614	62338	62747	167987	162160	154066	70194	52867	65878	210853	205003	199904
54	21934	28701	21118	271246	250836	249563	40397	37632	31211	65073	55839	62172	185644	164097	147660	82908	56470	73599	215073	191679	195170
56	27062	30508	22417	271275	249188	243477	33491	43241	30650	62555	73116	61457	182358	154091	169408	83489	56844	75088	221359	201276	207810
58	30507	29903	21068	269190	251810	254793	36619	36930	34867	67597	56404	62658	177257	168549	154391	76250	58347	69059	219152	216001	219566
60	29612	36728	26188	271464	255477	250295	43165	39283	35645	74956	62477	72960	186494	164496	167388	86038	58750	72862	219406	215847	212405
62	24130	21629	30847	265696	262530	253020	38012	49238	28916	71280	65325	67726	193960	158932	168234	93106	64460	84950	244684	220174	213293
64	31713	26496	34084	267285	251974	252225	41675	40299	47970	76725	62122	66703	186751	174624	157186	74988	77114	86994	217938	226319	217549
66	30617	33234	31755	275537	256812	252084	38416	34375	29098	65649	65236	72057	185076	182916	164245	84847	61493	90873	227945	224526	223583
68	27030	26854	31001	267541	257980	253969	48057	33792	28789	71899	67426	65566	183271	174359	180279	93759	75561	78298	240448	228701	232282
70	37523	24999	29682	271398	255304	254729	46353	22974	25489	72259	62569	61572	188969	178001	178672	87824	65411	92824	235356	238691	215813
72	31108	32183	30640	272374	259980	253151	50779	37306	42140	79379	71983	71283	198817	200172	187922	88321	77726	95279	243307	225527	236888
74	29803	33938	35744	270952	268024	254767	48642	48056	32300	80285	72779	69330	202344	172739	189811	84708	73821	89672	251001	236910	252840
76	34584	36026	28406	273198	257870	256643	37528	35598	32694	71607	67979	80241	187854	181740	190757	87101	69060	81841	247235	243400	238435
78	36148	25733	30802	271013	262817	256203	49109	50514	43689	74529	70730	85732	200407	188585	194362	76798	70860	93402	241363	247020	234915
80	33983	40368	33151	279685	257920	249764	51252	47707	37294	86280	71788	71686	213237	199032	192035	93387	66027	105640	260655	242211	256511
82	41622	32807	30643	274510	265808	255274	46011	35891	29258	82559	78030	72158	209789	192889	199102	93491	65420	87622	249556	251804	251731
84	33818	34496	23946	271961	258510	255979	40753	27789	35538	71687	68145	66481	202215	180590	179120	82875	75784	93193	254104	237766	240020
86	28962	32417	39046	272537	264473	261410	40865	48926	29009	92457	69591	72028	208347	196875	199090	83682	86289	94229	268140	242743	256311
88	41367	37586	30970	269572	260497	268789	33983	28836	35568	75960	65897	91367	207091	199738	185778	97508	80857	98674	269142	258926	254620
90	27745	33720	34922	273987	262727	254897	48034	37457	32851	77485	83971	76790	206073	176967	193562	106351	86581	95200	260079	256135	259450
92	40561	34165	39662	278386	260144	256467	42772	45533	44100	82752	77138	84390	192470	200745	188020	105255	87137	97700	264135	252327	268187
94	37879	37029	39731	279226	261370	256743	44036	39803	35272	86894	71316	76077	212309	203016	184682	108556	86759	98418	260358	252088	253830
96	35750	34835	40792	278904	266256	258983	54460	39983	36029	80221	82664	69256	214955	187296	200490	108715	98649	110734	255149	264787	256767
98	36714	32380	37022	283605	265640	254937	37016	48431	40251	84719	70200	86368	214518	197632	195029	95998	83250	101507	278607	270036	262885
100	39559	35471	33889	279513	264401	263542	50501	30436	43005	77154	77711	74440	224091	206849	206496	102696	80435	101277	280371	279319	274481
102	42007	30032	31436	278341	269514	263965	55022	47298	29201	88607	70117	76957	215055	195184	197126	94249	81107	102588	288407	271350	263546
104	36933	45728	38889	277481	271465	263509	46697	41463	41138	84245	83603	87207	225575	209725	199517	111647	81228	107011	270244	280284	265816
106	38384	41373	32981	272968	262484	258689	51050	38041	42192	85248	79164	76685	202429	210288	204548	97882	85911	105323	285826	278229	261932
108	43995	35146	32779	281480	265309	264580	54924	42616	41841	88694	80342	87604	214926	199640	192965	102099	91982	109645	271900	280022	265145
110	50870	37567	33734	280661	267338	266147	48331	46872	41773	84828	78187	94229	222449	211810	195990	97461	88148	116748	283044	281594	267060
112	31499	42433	35076	278950	263931	260753	49228	55554	29895	95812	91372	73810	230223	205865	204729	121151	91679	105605	272248	285752	261696
114	44577	48267	33654	279248	271422	265284	49958	51721	35335	88613	85036	85725	239387	222818	213867	100522	96130	107933	283037	262222	283555
116	43606	42994	46168	283589	270315	268951	52355	50971	38773	81383	76767	81333	247950	209161	209236	104634	94794	116882	285706	284031	281548
118	52057	40316	38850	283158	271795	264242	57024	53914	42948	93813	88377	80194	223466	210778	209058	127006	85033	118478	288988	287102	283099
120	36653	31655	35387	294126	274368	259718	57271	57811	37685	100082	88479	78740	241802	210365	223719	98156	88194	114288	280534	274484	274569
122	37937	39304	48276	278800	270717	261418	54261	53719	44413	90838	76019	89385	222574	215480	216865	121091	88604	105234	292439	303084	283507
124	44485	39109	43407	277405	266132	259274	52353	51979	48672	94433	82903	93271	239305	212376	215348	108408	96296	110161	290401	297596	283699
126	37954	38627	39676	284966	268599	271407	48391	55203	43591	91339	98439	92693	246771	209347	198585	118579	99117	115536	306219	287717	299297
128	41465	44159	34500	284045	261684	260776	49229	54187	43901	94036	83242	87014	232877	217317	232204	114301	99306	116899	306961	282369	288373
130	39753	47025	37829	286314	271210	259314	50628	39211	38948	86509	91156	94558	242403	227916	206514	116270	95850	110673	297837	289597	285692
132	42824	41237	47098	285195	273525	256072	56271	49060	48628	96450	82292	89312	231269	206882	212427	121008	93878	111115	288449	292411	290091
134	47469	36472	39992	280430	267027	264845	58803	59902	41959	89194	87360	86635	236595	208850	224561	117977	105820	122712	312296	290442	282716
136	40263	41781	43075	281551	270519	273675	52307	54828	43241	101654	94833	97361	240087	225718	221725	127264	92543	120600	293086	297604	291114
138	54605	41407	38416	286261	272108	263082	62030	50056	46938	100279	93472	91405	233165	225428	209901	135060	107848	119007	311052	290050	293063
140	36660	43810	38776	286280	270957	264902	58941	51865	47285	97868	91862	94633	231820	217045	217392	118320	97905	129434	308173	301163	293638
142	40041	45354	39376	288060	275104	274999	56081	48370	30624	98301	99492	88643	235587	219656	212322	120845	99015	143363	316018	294584	297518
144	40322	42116	43042	291111	266021	273867	53643	50438	52688	102696	93178	97276	222140	225652	215074	127185	103643	118853	300529	300245	287333
146	40974	45522	43320	286844	276260	264117	57074	48647	41016	105011	95021	82097	226866	250932	234203	131870	106416	131916	304953	288899	297833
148	47209	45651	40502	287640	266318	262004	51279	45417	38004	102791	95515	94048	237616	231141	238563	129402	98940	126508	303036	307361	292047
150	37641	49850	41127	288001	275095	260212	59570	60225	54946	109241	104923	90170	230622	242562	215294	133260	108896	137090	309310	299934	299223
152	48182	46614	41435	288202	275822	269184	47008	62475	42456	111337	96392	102371	244723	239023	220644	132997	120813	144076	309020	287460	309830
154	43067	47974	43904	281391	267538	270127	56720	46018	52915	99529	94880	87372	250177	241003	237185	137389	113225	140544	306212	301188	303594
156	35500	47609	41562	285224	270260	268431	49419	60529	44715	109729	97804	107307	253800	235217	222090	128126	104087	129034	310493	308206	321136
158	43737	48631	45215	285000	270072	266119	53793	58678	44413	110254	93128	103508	275175	238284	234175	145629	114808	129793	321281	307880	310377
160	43857	46596	37312	289865	272267	266118	47110	51619	53745	104593	87032	98256	258073	218873	234155	140876	105688	116270	301740	309363	313538
162	49784	45235	39901	276881	269242	268637	51256	56829	54782	98150	101937	100952	247844	230424	230261	142449	118998	142662	319249	312537	313024
164	48337	49090	39622	287853	272208	270553	55403	49849	54860	115068	86884	103587	257368	239282	243662	137901	105528	121546	311439	320729	317884
166	42077	49064	40319	287482	268842	264147	57525	46680	45991	104616	105712	97954	253772	254395	230615	136415	114100	140431	311959	304459	289849
168	41425	47353	47304	285556	273257	263948	51022	62299	52805	106994	95229	104390	267047	237689	245815	126933	106536	128397	313207	300354	298120
170	53715	45633	43196	289672	273868	264667	64318	60373	53091	119866	101389	93326	244308	237521	228359	140719	111339	143785	312863	298634	313814
172	44098	40595	44573	285925	261876	265358	49457	57496	52277	97292	94830	93232	265061	240416	228461	134252	114024	129287	315104	300919	322201
174	44043	52626	50141	289012	271253	264186	67398	54102	48708	105068	96615	101375	250685	238166	244222	150451	102491	134307	316296	309225	319537
176	47287	42348	53738	289116	272952	269372	64553	46958	55630	114198	90749	99657	257444	232080	215777	135956	123899	143213	305903	330188	318509
178	56129	41839	48134	283786	272555	268899	69629	60265	57648	108774	95671	97150	261208	238114	241175	146005	126812	143835	334593	319025	316035
180	61683	46413	43905	283328	266389	268315	66814	56957	44256	103162	101147	99741	253678	233488	227159	145897	121583	129765	330788	320437	318001

## Sheet: Figure 2A
Time (Minutes)	Quenched Probe (0.05 µM Probe2)			Positive Control (10x Same Length Target)			TM3			TM5			TM7			TM12			TM15			TM_12_15_18			TM25			TM36			TM52
0	34717	30974	33283	72018	69496	70287	41926	39117	39998	42242	39970	43925	50499	51367	51880	48358	48501	50750	37265	38606	35620	37185	37830	36274	47211	47503	49059	39392	40241	41701	42483	43589	40658
2	34466	32207	33021	79494	75478	77764	38353	37936	38379	38856	39753	40211	56281	55824	54046	52057	52726	49548	37878	41911	36759	35092	33861	36549	45946	48247	48593	40996	41078	37180	42738	41134	42454
4	31993	32884	31550	89430	91806	94546	37302	36988	42824	44767	39686	42562	55670	56305	62521	50962	56701	58093	35945	37369	35129	36578	33939	35274	49492	52860	52110	40571	38512	39153	42996	45458	42040
6	31388	31392	30908	97094	97280	97826	39424	39917	40745	44513	42783	42248	62773	57618	61808	55355	62845	60999	31569	37605	33547	34128	33325	36397	50942	51213	52190	33670	38156	38723	43510	42594	41955
8	32204	29453	32916	103306	99481	103334	39693	41161	40725	41252	42212	44940	60488	59922	61773	60900	61760	64182	33818	37538	32326	34091	30815	36292	50158	54073	55422	34810	38367	36167	39859	41751	42025
10	27326	30438	28578	104044	109329	108742	41130	41256	42294	42371	44188	44771	63104	63451	66318	62745	66262	64873	34107	33229	34496	33429	33653	33355	52326	59579	59295	36565	35983	34263	41459	40032	43080
12	30472	28199	28939	112023	113973	120313	41469	42343	45107	43725	43072	45710	66554	64413	65631	65607	64439	68401	33461	34471	32862	30474	36349	34252	57365	52616	53370	34934	38120	39241	41612	39059	41246
14	29090	28875	29685	122068	120869	121147	43578	42052	41300	46748	45759	47523	72962	67935	67374	68358	76317	73127	34221	36043	34650	29883	31305	30133	54660	60016	59820	35419	38480	32792	40511	39164	43219
16	28552	27583	27202	125625	126838	127300	46569	43543	45257	47370	50863	50262	69243	65388	68815	73788	68293	77712	35196	32221	35711	29808	35588	33577	58868	62523	60254	34180	39872	34710	42301	43707	43268
18	27592	27405	27605	124736	126475	126028	44282	48795	45332	49987	50876	48831	71023	74561	69180	74848	78398	81577	33124	35386	34476	31956	34734	32373	59511	61794	62366	38495	38891	36149	44045	43623	44279
20	28959	29218	28626	135070	129472	130712	48878	46049	49202	51549	50204	50651	74357	71022	74415	79471	76770	78538	33503	35641	33541	32777	33782	35486	63217	64923	66255	35194	36851	39665	45750	40794	43123
22	27819	29257	27332	128526	133271	135478	49509	45680	48869	50145	54838	54148	74331	77076	73208	82040	80515	83883	31683	33634	32005	33887	32755	33840	62510	67716	66206	36588	36720	37457	44960	41763	43159
24	26466	27879	28229	134321	134972	141860	51004	47739	48571	51071	53530	55003	80847	74556	75114	83191	86657	82513	33662	34143	34091	33978	34303	32830	63137	65551	68505	38365	35369	35748	41461	42444	40906
26	27350	26997	27141	139479	140450	144216	49164	45985	50762	53226	54042	56118	80817	82247	79474	85788	81856	85723	32952	36051	33536	32533	32085	33235	67718	68582	72221	37264	39313	37962	46668	44235	43799
28	24542	26246	25232	138095	143203	140666	51167	50063	51835	55220	54879	55478	80988	81105	81460	87348	84099	85451	34506	34122	34469	36596	35915	33535	70669	70466	67838	37386	38822	37249	42583	46359	43001
30	27635	26986	27512	141935	142794	141423	50374	49039	53855	55369	57742	58195	85691	83610	82720	84248	87979	90514	33691	33982	34133	34413	33338	35320	68704	68364	70176	36229	37068	38596	44305	45227	48432
32	26021	25862	27947	142240	141726	146069	52688	53054	54723	56720	57326	60780	85488	83223	81657	89994	89442	93745	34019	35143	37302	34423	33605	36460	71706	72724	73303	37789	38177	37860	46599	46414	46357
34	25118	26278	27614	142335	144863	149546	53547	55456	54073	58472	56873	58132	85806	84630	86010	90623	93431	94122	35508	32556	32280	34030	32459	34054	73964	74670	71495	38179	38998	35988	46077	43615	46205
36	25757	27821	27598	150418	148599	153704	54789	56213	54937	58849	61015	62014	89210	85976	83820	94045	96776	98887	34658	35279	36265	34229	32949	34939	73738	73095	75744	38131	38110	36964	47168	46133	48572
38	27295	26891	28834	150556	151372	152237	54666	57819	57818	61439	60023	62541	91320	88318	87443	95682	98038	97467	35894	36359	34998	34684	34585	36360	75275	76106	77124	38884	40075	38169	46764	47657	45910
40	26039	27945	28976	150755	150422	147996	56671	56896	59062	63594	62551	62876	91369	89954	88331	101929	97357	100331	36230	33081	34651	34099	36430	36409	72569	75527	75650	39584	41672	38745	46453	45760	46217
42	26431	27856	27508	153723	154635	152939	56708	59652	61863	60121	64671	64459	92573	93124	89689	99956	100657	103405	35489	36393	37001	35372	35201	34388	76452	77028	75186	38277	38550	40103	49959	46702	47567
44	27156	26833	28940	153676	152606	155136	57673	64056	60883	61772	65768	65520	91904	93402	94819	102668	103443	107594	36435	36687	36779	35318	34989	37852	78252	80817	75073	37742	40047	38049	49095	47351	45302
46	26499	26689	28225	148975	153281	155151	60950	62051	61048	68623	65409	66321	99165	94705	95165	103505	104095	105952	37094	36033	36885	33515	36163	36957	76741	81788	77248	39749	39517	39388	47840	48140	49363
48	25687	25633	28181	153781	153035	157252	56920	62873	60818	67112	67415	65457	92648	97593	94207	103677	104514	106839	36684	35891	35694	35551	35724	35343	79816	82187	77966	39219	37879	41567	51150	51102	47287
50	26241	26640	26452	151444	152602	158685	57665	62072	62470	65708	67060	67550	96142	97747	93113	103364	104480	107464	37198	36012	34720	34511	34869	36753	82371	82761	80995	40900	38918	39242	50068	47024	50253
52	26225	27104	28872	151222	156626	158359	61763	66525	63566	68171	69076	67403	99335	97261	93067	107793	111449	111852	39649	35650	36744	35739	35018	34459	82982	80650	81510	39621	40201	37708	46804	52943	50503
54	28167	26398	29008	155424	156498	154599	64417	64848	65034	71148	69532	71386	98755	99073	95015	107228	106932	113956	36240	35873	40356	35065	32805	37093	80126	80337	81077	39898	41608	38317	48010	50282	50671
56	26239	25503	28432	154881	154663	161462	68354	65730	62563	70967	70916	68724	104021	101632	97654	109346	108295	111506	37930	37065	36903	33799	34480	35825	80725	81503	80027	41249	40162	41783	51022	46601	49994
58	27713	28370	29963	161021	162818	162466	67724	63929	69214	69274	74324	69217	101629	101366	106031	112285	114261	117012	37084	36405	36100	36097	36554	35758	86215	85062	84056	42190	42192	40191	51285	49512	47078
60	27520	27309	28037	156956	153952	163554	65915	66453	69029	74494	74259	74396	104989	102087	99044	113733	111801	114336	38612	37752	36237	36987	36261	38016	87176	85048	80390	41186	42948	40422	50493	51581	52786
62	26514	26842	27369	153017	159234	161566	67432	66666	63729	74045	76341	74540	103307	107673	103916	118664	114239	116732	37319	37909	40210	35351	37395	35944	85158	88512	79442	41640	43628	43237	51852	50390	51247
64	26449	28376	28048	153553	158434	163098	71715	68627	67614	78329	77228	75800	106424	105421	106032	116326	117038	117178	36253	38664	39402	33773	36449	39672	83837	85040	82974	43501	43047	41689	52512	51967	51189
66	26726	28482	28864	155290	163998	162054	69514	67905	67366	74597	73620	74112	102706	101499	103201	114505	118143	119320	39249	41528	38000	38113	36662	35964	85238	87480	83142	42224	44579	43315	53301	53227	50665
68	27016	26766	29846	156342	165658	165861	69053	67893	69963	71504	75786	75253	104388	106283	103971	111658	117926	123333	36786	36657	37643	38163	37724	37038	85867	83538	84076	43526	45933	43862	53584	52654	53351
70	28935	27696	29431	160378	159890	165076	66534	68617	67824	76043	76892	79799	111544	104028	108343	118629	119423	123771	37327	38958	38335	38576	36763	36743	87497	84675	83582	43769	40564	42287	54382	55261	50857
72	26102	24992	29288	163933	164688	164502	70119	70526	69688	79695	79338	79973	105549	106564	111248	121780	123751	121330	39063	39349	39013	38231	38343	38241	85884	84435	85645	40922	45170	42183	53495	52697	52838
74	25845	27637	27302	156439	166573	160389	72496	73581	73545	76437	79094	78558	110342	116154	110105	120616	124412	123438	36660	41356	38372	37950	34938	37832	88187	89104	84320	42213	44544	39910	52926	55719	53699
76	27924	27738	28049	158694	163833	163354	71168	74818	72125	77840	81128	84355	113465	112060	113071	123429	122350	125615	38110	38783	37696	35609	37919	38926	85368	85648	87890	41617	43464	41626	54787	53988	53200
78	26874	30278	28023	162182	164974	168772	74858	73612	70435	80485	81542	80543	116852	110598	109919	125272	123320	126362	37572	39402	38691	38527	38549	38765	86165	92517	86903	43363	47049	40720	53046	52169	54651
80	27179	28248	27672	159841	166560	167858	75649	75846	75976	84005	83035	83010	117360	114704	111500	124387	125255	126585	38048	38747	40254	40658	37160	38317	90660	87454	88536	43881	45790	42723	55840	54222	52678
82	27240	28599	29627	160526	164012	171014	72581	76845	73809	79596	82658	85199	115726	114774	113785	124154	129400	126606	39497	39426	41488	37582	40613	39144	88480	93866	84455	46358	45841	41263	55877	54154	52594
84	27510	28735	28362	162427	171535	168631	74940	73288	76588	82262	86302	85050	114796	112657	117206	124212	127626	130896	40779	40015	38567	36984	37262	39330	87935	94500	86106	43547	44552	40509	54919	54355	52088
86	27534	27519	27374	165098	169443	170227	79327	76780	76989	78224	82913	86972	116054	116474	118312	126016	129014	131566	39455	40231	42490	37726	39304	37940	93404	91268	89215	45348	45691	43148	56183	55855	56207
88	26998	26562	29321	164629	166422	169450	77667	77701	78087	84012	87547	88296	117374	119431	117053	128209	129132	132540	39697	41263	42063	38657	38373	38142	92572	89537	89758	46500	45889	43025	55352	53882	57540
90	27292	29206	29046	163717	169717	170856	74944	75919	78745	81762	82519	87461	119430	115252	119316	129042	135911	134400	40182	39527	41535	38157	40081	40964	88100	96142	89980	46552	47366	44300	55426	54828	53391
92	26947	29349	29033	165604	166274	170133	76275	79999	80838	87369	89277	88143	117863	121267	124134	129552	126756	133961	41092	40287	39905	38237	39840	39117	95653	93689	88267	45406	46132	43344	55896	56710	53694
94	29326	28247	29447	163847	170062	167927	76698	80952	77626	85705	86655	87645	118472	116476	118244	128975	130974	134208	38873	37936	39713	40073	38888	39914	95778	96834	94284	44941	45190	45694	55255	53836	57365
96	28277	26446	29741	161160	169700	172088	78203	78669	81032	87618	87670	86438	119022	116851	117546	132872	134152	138158	40385	41399	40761	39651	40792	42036	93824	91534	90256	46505	49021	45516	58059	54519	55043
98	28222	26943	28022	165280	166303	173815	78777	84834	82223	85082	88650	93033	121839	123673	124119	130995	140487	137498	40705	41250	39842	41226	38785	41166	94660	93757	92272	47821	46269	43614	57387	55114	56379
100	27124	27115	28890	163695	168716	167333	78096	77832	81606	86535	85420	92412	120499	117613	122296	133192	134522	137523	38281	40227	41824	38001	37559	42491	94719	95369	93118	47233	49824	45277	57919	55475	56619
102	26245	28404	29799	165033	168771	172727	79320	85607	82776	89419	90746	92056	123353	120918	121660	138207	138422	141501	41999	43387	41189	37009	42339	39285	95197	94617	92504	46888	48816	44707	57871	60233	56641
104	27597	28830	28295	167633	173620	174188	83329	81557	84829	88680	94171	94287	121916	125334	122782	134243	139175	134997	40874	41211	41867	41874	39755	42201	93816	98047	93183	45894	45481	45044	56871	59582	56055
106	26822	27982	28071	169061	172072	173693	85044	81872	85789	91439	90054	92434	122429	126013	123683	137116	137615	136514	43009	42237	41715	38637	39136	41245	93345	91513	94877	46905	48052	48604	58904	58341	60311
108	29114	28293	28786	167129	166211	177646	86784	82720	82472	90684	91061	95653	125320	126462	121531	137041	139158	141669	39668	40971	39775	39937	40495	43080	94834	100998	94097	46147	47783	46575	61893	57751	58860
110	24347	26867	27577	170564	168206	173445	85352	86073	81191	91016	94072	96053	126934	125671	125636	138697	143494	140549	41084	41857	41797	39625	40652	40943	94459	93766	95239	47859	48123	45300	62225	58388	56510
112	29133	26560	27130	164746	172384	175480	84402	82144	87629	90499	95271	91337	132015	124449	128758	135241	141431	136805	43043	40980	42914	41717	40662	40819	98365	95200	95440	48410	48898	45008	59063	53308	57513
114	27370	26438	26977	167701	172023	179192	83184	86783	86296	94830	94674	93661	126550	126550	123339	135055	139805	141768	41968	41249	44328	38517	42419	40893	96422	95065	92824	46441	48871	46270	59335	60714	57038
116	26540	29915	26446	166433	171713	176012	85639	85705	86223	92386	93282	93600	127748	128429	124667	131981	142937	141122	42640	42500	43932	37254	40271	40930	92897	101351	91740	47632	48943	45775	58599	57695	57211
118	27422	28219	28556	166569	176032	174090	87811	85490	86651	90622	93147	98960	127526	132403	126497	140331	139860	142524	43811	41577	43038	39416	40694	38215	94040	99912	95291	47296	46921	46768	57382	60247	58435
120	29975	29142	28900	168294	176873	169809	84893	87717	91175	92649	99875	95848	124497	130166	129009	142314	140465	143961	43475	41404	41055	38089	38580	42240	100383	98984	93541	48635	48436	47834	58988	59816	56830
122	27161	29018	27687	166727	169436	173666	87117	88521	89384	91968	97444	96225	124293	126808	128411	141027	140626	141660	40547	44542	39276	39595	41083	38611	98934	98529	93513	49040	49186	47550	59935	57620	61093
124	27435	29172	26527	166271	173040	171527	86278	85046	86127	91284	97754	101933	127086	127103	126626	140820	142812	142148	41286	43236	43580	39114	43345	43036	98474	99506	94709	48246	49699	46657	63462	59356	56135
126	27560	29660	26807	164885	171301	170461	87613	87025	88264	93769	97308	96178	129561	129421	130872	140827	136490	144386	41920	42357	41190	39010	40349	39130	94449	96413	93847	49871	49366	47428	61039	56909	59731
128	26711	29341	30671	166454	173430	175198	90694	87907	90809	97976	98707	94063	132701	130139	127711	139966	142503	145951	39357	42477	41566	40134	41442	40254	101302	101772	97403	47751	48626	48964	60417	59877	60106
130	25793	27666	29218	167272	173169	178041	87496	88671	89471	95652	101345	98251	131386	133967	131090	141069	148586	146814	39903	44291	38928	40034	41001	43470	100845	98858	96158	49760	49886	49553	61887	59679	61107
132	26358	28142	27681	169809	175726	174718	87731	89519	93586	98926	99830	99280	129667	135692	130154	141836	138700	144095	42231	44171	43271	40266	41288	39681	100655	100123	98703	48247	47635	48278	60589	60458	59772
134	27667	30693	27531	170877	172307	179888	89065	88978	88379	93695	98783	99963	137429	131779	132301	145390	146910	148672	40471	43920	42273	40745	41535	40808	99806	97113	99935	49086	50493	47633	61748	60477	57352
136	27075	28170	30158	161915	173101	174918	90762	92375	91410	96922	102254	100243	132941	134191	129080	145528	147897	142765	42199	45651	42119	40830	41420	39540	97782	100977	99997	50691	49151	47759	60932	63137	60210
138	26667	28425	30578	169325	175410	177168	92223	92274	93630	98202	97120	100141	133563	134249	130337	147428	146023	147477	44115	42732	42413	40847	42081	40392	100205	100960	97963	48082	48010	48765	64049	61894	59897
140	27784	29970	28521	170497	170618	174275	91635	92459	93506	95306	100688	103382	132093	134477	134425	142888	144185	149200	42808	44060	43178	40483	40211	40013	100411	102347	98476	48271	52435	48713	61345	60833	59497
142	25796	28439	27885	169720	175446	176548	92409	93455	94756	97631	104582	99795	132510	135064	136753	145362	144977	146163	41924	44244	41610	42035	40715	41148	97732	101838	98433	48950	49219	48763	59901	59635	58851
144	27924	28336	27979	173681	173006	176081	94040	93481	94361	99681	101842	104723	134114	137337	136966	142667	150339	152518	45269	41681	42798	41069	39672	42143	100259	102335	99431	47741	50750	46815	61221	60329	59347
146	27924	29163	28344	168433	176299	172161	87650	94237	95703	101490	104643	100674	134788	138720	136528	145867	148247	144750	42995	43998	42104	41249	42428	41201	99120	100623	102360	46922	49170	48113	64832	61244	61079
148	27564	27281	28371	170797	175705	174991	87281	96599	93327	98738	102557	105121	134535	138034	134902	148063	144520	150401	46100	43507	44041	39910	40408	42016	102192	103531	100600	51081	50922	51102	61491	61897	60238
150	26114	29399	28222	166431	176380	176878	94357	94228	95256	98614	105915	104797	133113	138773	138984	146663	151800	149875	43865	43375	42092	40171	42479	41964	102361	107438	98152	52470	50725	49659	63212	62120	61779
152	27506	28941	30063	169006	174646	175210	91583	95416	94645	99960	102047	104263	134956	136842	136532	144735	147122	149901	44061	43395	44556	39397	43907	42280	103759	99852	98259	50910	52333	50042	62255	62080	59254
154	29397	28035	28167	168046	173240	174391	93611	92098	93318	100874	103703	103630	137081	138667	140542	148643	151671	146440	45036	44442	45727	40692	43036	41654	102688	104052	100397	48856	49684	50815	62046	60555	60422
156	27304	26104	28989	172331	176044	181734	93205	95524	93364	102452	103591	104002	136549	141274	135318	150618	149372	149469	46969	42648	43630	39944	42383	40777	103420	105303	103276	48317	50175	46521	61452	60106	62704
158	28445	30160	28366	173707	176422	175519	93169	95975	100629	105251	109641	102931	138798	137964	136479	150493	158060	150444	43944	45378	44985	41696	42123	41735	100513	104737	101769	49206	50209	50134	61044	64173	62070
160	26227	29135	28388	172442	179016	178312	93805	94339	98831	107790	107948	103432	140766	135633	140520	147086	149177	151739	46025	45849	41312	40945	41872	42217	105928	107203	103083	53821	49182	49813	64266	62504	63839
162	27855	29024	30553	174365	177924	178011	95961	100482	97084	102625	106842	106284	138055	136817	137095	149567	149983	155685	43346	44922	43873	40751	43990	40410	103766	104000	104129	52060	50992	48237	66191	63988	62682
164	26560	26499	28495	170831	176628	182818	100141	100760	100120	107157	108840	102968	141480	139870	137847	145787	150679	153283	45127	43829	44412	42206	39948	42039	104479	105459	100189	48995	49964	48756	62502	62454	61362
166	26642	28230	29553	171799	177302	178811	97311	97002	100261	107129	109174	108000	141536	140828	140093	152077	155563	147818	44650	43813	44370	41137	41764	41357	100759	103651	99377	51495	53205	49127	64363	63489	64217
168	27944	28651	31013	170012	176978	177578	98368	96939	97626	106990	108211	107605	141718	139958	138014	152848	156662	155672	45131	45528	41375	42353	41641	42229	103903	107200	104136	52613	51495	50857	63741	64423	63644
170	26174	28596	30480	173452	176251	182838	96246	101754	97326	105843	111610	111319	142611	140999	138853	153693	147843	151071	43209	44524	45052	41299	42770	42476	100348	107157	101301	53097	54200	51110	62504	63277	62420
172	28003	28863	28405	172776	179979	180608	98373	101661	101632	107236	109194	108450	141431	144451	135454	154252	154194	154196	43967	42967	46333	41316	41090	43429	103646	103933	101892	52024	52960	49866	59825	68029	62700
174	28332	28479	29375	169096	175408	180606	101691	100602	103956	107531	110164	108874	141938	139046	134256	150904	154827	153755	42410	46993	46025	41843	41655	43925	105102	103008	104878	50807	53331	50940	64563	63488	61908
176	30015	28887	29673	174542	179929	180339	96783	99903	102309	106772	112505	113028	143482	143814	143362	152501	158269	154133	45604	47483	46077	42252	42832	42420	105844	106729	103236	49560	52963	47088	63572	61785	62500
178	29824	28846	33005	172276	174703	182905	97862	99324	102342	104139	112014	111167	144570	142667	142337	152675	157395	149305	44263	49168	44565	43733	42390	42587	103382	109018	100930	51144	52225	52346	62642	63395	63788
180	26900	27998	28930	173919	182669	185506	99089	102204	104088	111529	112089	113660	143396	144066	143040	150910	153102	152000	44349	46693	45355	44354	43854	44216	109936	104856	101913	52136	53380	49442	65703	64154	63592
182	27921	29478	29348	174429	178064	182295	102612	103889	100262	110910	109968	113181	144574	147706	146205	154019	156746	154634	42811	45834	45744	43530	43060	43430	111007	107856	102257	50870	54446	50404	67197	63940	62304
184	27873	27556	29957	172983	179291	172901	98686	100971	101163	110654	116211	111775	145020	143373	145495	149943	155373	151500	46441	47092	44801	43851	42170	41298	104438	106671	101472	51175	51249	51557	64903	61581	64813
186	29788	29368	27061	166721	177085	186363	99695	102063	104809	110471	112386	111469	143633	148110	144541	151545	155539	151654	43837	45599	42465	40969	41956	44059	106706	106743	101751	53320	55292	51572	61954	64592	65832
188	28387	27375	30178	177311	180357	181743	101015	102261	104950	110165	112834	115020	144139	147066	148030	152936	153077	155756	45638	45143	46276	42923	42544	43968	109695	106321	100840	52432	54244	51576	66132	67284	65685
190	27504	30103	30419	175722	176898	183644	105115	104123	108696	108848	113014	113638	148095	143606	148066	153601	157964	158242	46367	44780	47668	43812	44677	43934	106728	108290	105903	51723	54895	50094	67314	64987	65446
192	27118	28106	29350	173002	177553	179825	99890	106845	105263	110147	111926	112048	145552	148119	149166	154230	156851	151600	45081	47120	45264	42972	42730	42984	108865	105445	105332	55433	54461	48049	67303	67618	64440
194	29583	29189	30195	172896	180261	180303	104485	105710	103618	108671	115919	111856	146175	144895	144851	154525	156830	158943	44324	47472	46504	43736	43112	43911	111018	109416	107225	52008	52903	52956	69189	64831	66138
196	29120	29013	29551	173278	179339	179032	102796	104449	104640	113634	115068	115419	147584	152761	150997	152382	156184	157282	48367	45249	46315	43301	42922	42320	109114	109220	107197	50556	54705	49878	69937	63990	66265
198	27300	29065	28465	175652	182639	179972	101744	102714	104778	112158	119454	118530	148241	149122	148207	151973	159876	154721	45718	46246	46159	43797	46313	41589	109735	112439	102336	54539	54147	51914	67280	68420	63973
200	28555	28437	29188	172801	178263	186138	104065	107160	107660	111090	114620	116366	147842	153403	148007	153678	156616	151588	44855	47916	46113	44147	43665	43780	108936	109926	105029	52343	53519	49936	64923	68963	64612
202	26816	29853	29922	174423	179483	179651	104381	104852	106096	112889	115248	118983	147999	151270	148668	156676	157204	160192	44286	45123	43523	43554	45621	42955	112704	111799	108630	53278	53437	51031	66956	67185	66170
204	29096	28709	28172	179206	177036	184241	104316	107985	109484	115264	115240	114193	146838	150943	149146	153154	158470	159732	48704	47333	46351	44944	44841	43398	109974	111837	105949	54473	53336	49600	67141	64311	64382
206	29215	29039	28380	172071	182483	185556	105387	108712	110516	114244	119146	115187	149156	154959	149032	159801	154462	159542	46529	47678	44829	41973	43943	44078	110822	110241	110684	54517	52823	52025	69373	67665	66355
208	28720	27322	28471	178075	182656	187914	106404	108087	107071	115145	116209	115287	151299	153583	143850	156782	162468	160518	47313	45274	44071	44255	45015	43998	106924	114045	107427	54194	55695	53843	69205	63171	62710
210	27100	28272	28565	176631	178276	182375	105110	109284	109094	111944	120256	116803	151486	150072	152550	153999	159394	157594	45994	46371	46332	42829	43548	43611	110456	111912	107530	54872	56470	51458	68411	66679	63632
212	26114	27325	29389	171750	182353	186049	107760	106543	110658	111844	117406	119541	148054	153026	151966	152849	159478	159073	47234	46302	45239	42857	44626	45673	111072	111862	104208	53036	56468	53025	62446	63368	63721
214	28208	28930	31446	175041	179545	184040	104041	106618	106484	113232	117581	120590	146912	150157	148166	152380	162061	160073	46971	44866	46279	43917	44737	43077	108202	106524	106928	54894	54927	53271	65935	65116	65140
216	26742	28907	30359	173707	184865	179976	108723	107057	109248	114483	120765	116830	156722	149085	150105	157442	159933	156233	48694	45885	46854	46155	44505	42752	112231	108338	107211	55783	52594	51814	68466	65028	63711
218	28796	29329	30282	175786	180615	180298	107746	110014	105228	116724	118202	119104	150007	154997	151069	155335	161998	156219	45957	47685	47337	46704	43582	43905	107873	110242	109378	51984	53148	52031	65996	66754	66396
220	29496	29309	29830	176579	180586	186758	105260	108806	109350	114784	118278	118670	146529	149380	153174	153021	159505	155795	48324	47612	46595	44770	46093	44751	109851	114217	109253	57008	52191	52440	70626	67021	65021
222	29785	29110	29540	175948	183652	182781	106700	108665	111008	111437	122734	120952	150498	153877	148683	158135	157315	154304	45913	45530	47600	43854	41579	42599	109935	110388	111009	54904	54448	53774	67234	65878	65917
224	26042	28448	31110	171028	182295	181096	105664	109085	107762	113004	120506	121551	147812	150676	148294	151048	159905	160250	46742	46737	45596	43831	44433	43364	112311	110970	107132	56211	54288	50182	66393	67454	66229
226	27955	28750	28548	173524	185536	185773	107323	110707	106549	119866	119176	120289	152221	153659	151745	156820	162814	162202	47552	48086	47049	44717	47086	41605	110974	117389	107385	56329	56406	52286	69956	66593	67659
228	28527	30150	29567	172101	185369	181332	106329	110023	107390	115685	120576	118192	150579	151098	150273	157375	161626	158761	48139	45578	49032	44791	43533	44298	111829	112060	109178	58087	53815	52544	68208	67769	66837
230	26960	28476	30141	174662	182413	186710	107051	108514	108678	114679	121632	116822	154543	157154	153697	158355	162392	155819	46081	49005	46219	46613	42985	44324	112337	111556	106788	55626	55671	55983	72770	66322	64176
232	31976	30819	28615	176434	181698	183679	107219	113294	110841	117590	123164	120279	150270	149145	153003	156157	164309	158025	46251	47503	46902	43266	46036	45160	112254	111816	110486	55115	56687	52882	68980	69412	63585
234	27310	28235	31338	174067	183024	180983	105982	112765	110086	116705	120078	119749	154568	153797	150690	154779	161756	159313	47014	47160	47719	46843	45850	45227	113696	111088	106993	54986	55029	51174	68650	67001	65417
236	29529	28117	29708	171705	183976	187530	109015	116529	113499	113678	125154	123307	149566	157079	148858	156020	163126	157531	47739	46330	47800	46261	44573	40652	112606	117183	107220	56254	57889	50833	68657	68896	69310
238	28879	29256	28421	173914	181194	189050	111721	110577	109686	119419	120541	123272	153705	157759	152444	160592	167268	157360	46196	47844	45967	42871	44410	44258	109387	110969	107227	55613	58228	53030	67918	68447	66433
240	28592	28586	30215	172413	185058	180516	110688	109420	113905	115751	124828	124719	150974	157167	150061	156079	159442	157969	47743	46953	45942	43202	45853	45541	112564	114867	109977	55323	58437	52759	69589	68006	67980
242	27958	30940	31408	171149	186085	183184	111242	109720	113534	119184	121395	124518	153219	158575	152367	157591	158953	162208	47299	49346	45622	43430	45041	43547	114155	119393	111546	54932	56611	52469	66709	69908	64861
244	26311	28196	30211	173778	179110	184574	110280	112551	111406	120044	127872	118960	156859	157138	152033	156117	159498	158454	47417	49569	44784	44030	46562	44297	110092	116093	109881	56837	54480	54028	69977	67634	67642
246	28815	30354	31397	177147	184154	191598	106795	114363	112047	116583	121021	123373	155209	154098	156285	164043	158411	161632	47212	48223	46933	44431	45641	41474	111488	119652	105022	54977	56160	51396	68203	69786	67369
248	28872	28437	30710	175065	184365	185172	109739	116599	110354	118078	124400	123750	156485	156503	155605	159355	157633	159122	46876	47909	48930	46146	45439	44174	114589	112542	107655	55133	55813	53894	70560	69004	67717
250	28108	29463	30102	175554	183508	185916	108494	112937	113870	120749	123588	121316	154504	152657	157947	157908	159829	163013	46959	48110	49072	45449	48270	43696	112819	110132	107465	55371	53077	54223	70863	69731	69275
252	30311	29277	29120	174069	186712	186970	111272	117320	113658	119459	129028	120803	156446	160873	154340	159962	164982	157839	48471	46460	46575	43526	45611	43999	115411	116944	109567	59330	55806	50431	70298	68346	68117
254	27827	30348	30542	174476	181111	183332	115770	112502	114987	119302	124938	123844	153634	158668	156614	156033	159626	162291	45880	47681	47747	44473	46036	44380	112401	116585	107320	55352	53239	53287	69828	70588	68349
256	27106	29529	29799	177479	180475	182053	114684	113240	113216	117539	122667	122323	157315	158133	153848	159303	161337	159176	47633	48014	47595	45147	46339	44561	114636	115683	113017	58791	54111	54954	66884	67993	67246
258	28798	28829	31048	178615	183051	186061	110815	113387	117274	121489	125310	126314	154431	160564	155007	157300	161807	160175	46743	49797	47078	43968	44889	45326	114447	114486	113358	57084	53077	53096	72469	71944	67860
260	27709	31340	29378	181260	186083	192879	112210	115819	117770	120582	123680	118289	156183	159518	157127	155983	166338	161548	44852	48476	44929	49107	44877	43557	112744	114521	111002	56305	56594	54523	71159	72312	69376
262	27831	28652	28789	176021	181831	188476	108203	114539	116998	119361	127317	122054	154827	158820	158925	159089	163109	150439	47056	48258	44602	45731	44312	44307	113126	112374	114367	59447	59709	54386	69515	69856	71000
264	28363	29040	29741	175648	186910	184737	115140	114682	118297	122411	120956	123760	155616	156238	155258	155789	161418	158913	47502	47956	47519	45001	45158	45327	118658	116792	113481	56820	56831	55471	70411	72549	68217
266	29013	31376	30744	171020	180944	187542	113119	112278	113349	118208	128206	127112	158278	161975	157979	157223	160096	159634	46376	50064	50979	45814	45374	45252	112451	112806	113948	57459	55883	53999	68086	70757	67775
268	30709	29628	29092	176199	182015	187897	115138	116277	112115	119250	124664	130660	157836	157850	150766	160143	161310	154929	49360	48733	45060	47985	46519	46243	112905	116423	112732	52745	60310	54216	70885	69523	69280
270	27245	28190	30363	178439	184225	186639	110141	118035	117571	124885	125813	126357	155045	162158	156072	156047	164960	158948	50091	51447	48232	46230	45474	44851	116128	117876	117528	57904	57416	52638	72785	69308	66055
272	29259	29815	30510	176514	183944	187351	111917	115993	116731	122854	124136	123163	157740	159999	158291	157576	165248	163316	47541	49060	48307	43666	46653	45361	116971	119930	113437	57847	56191	55950	73105	67464	68731
274	29442	29141	30403	175338	184706	183335	115293	114165	114356	121156	127738	123174	159078	156499	157814	161330	158610	163261	49592	48560	46254	44630	44699	45188	112745	116454	113120	58432	61727	54937	73145	71670	67293
276	27683	28635	28663	176747	186873	182770	115614	115275	114953	121867	129788	123937	161545	162031	160007	158284	157201	161234	49576	47932	49072	47122	44837	46234	117627	117543	115518	57563	59302	52144	71484	71013	69158
278	28738	29450	29787	174427	181811	186084	113915	119780	120166	125234	133065	128412	158544	153233	149950	156973	159675	156644	48237	46687	47908	43551	46169	47196	114912	112855	109159	58575	58859	56703	70744	68463	68835
280	29696	29995	29471	175335	187173	188883	117464	118333	117700	127245	132140	128406	156112	160217	154316	156465	162206	159805	47136	48767	47586	44503	46854	43259	119521	122421	112010	54840	57893	52538	74102	72975	71031
282	29612	29795	29158	173793	189173	182862	114216	119094	117391	126457	127855	126593	158666	161208	159177	157702	166016	159817	48100	48833	47434	44668	46293	45578	116780	118121	115484	59486	58049	52373	72979	71820	72015
284	29589	31056	29297	178578	185070	193641	116059	120862	117284	126422	127377	125902	156760	156775	155440	160860	161957	158766	50490	48994	46100	43692	47768	44747	116913	116889	113269	57416	57309	55525	74271	72039	71553
286	29357	29862	29016	173120	179215	188810	117438	119569	116584	124748	125509	125428	159844	162623	155070	160312	162642	156770	50197	49741	48245	47339	44874	44770	116098	120003	112492	57220	57316	52164	72488	70168	72207
288	29852	30161	31367	171983	184408	192609	117398	119133	115725	123956	133818	128734	156567	157087	154464	157968	163148	157342	48722	48953	49805	46312	47526	48028	115023	116820	113717	58574	57681	53092	76754	72112	66987
290	29843	28873	31615	179591	182766	191656	114438	118200	119405	129155	135215	132160	160357	162493	162683	159865	170002	156107	50350	48157	49051	49092	46738	44071	115964	118357	115940	58963	63047	55142	76722	68387	71602
292	31062	27946	31574	179934	186497	193396	113992	117484	119106	128071	132034	130218	159878	160891	159189	156419	164706	158347	48632	50914	49343	44816	47930	45825	118702	120494	109995	56418	57543	55485	71392	73016	70315
294	30933	30014	29470	176088	180445	190773	114908	119187	121975	129766	130282	130446	162682	161652	158243	157530	167123	160201	47053	48356	46957	45134	45562	46079	118518	118366	112259	57325	57458	55933	74049	74111	68487
296	30128	30260	29069	179759	181768	187607	116820	118499	115664	124596	129013	129020	162128	163851	162547	154265	160326	161978	46694	48597	46892	45767	49645	43736	117155	120958	110506	59212	57575	54642	74064	73025	68661
298	29258	28783	31315	174752	185938	185926	117612	115117	119562	124488	127807	130276	159780	162302	152644	158754	169151	162606	48672	46399	49627	47722	45265	44478	117890	119865	115180	56670	58952	56035	75741	75840	69501
300	27382	29699	30179	171892	183008	190977	116500	119792	118880	124730	131344	130340	154246	160673	157651	155345	163145	156383	48148	50830	48678	48449	43289	46217	115496	119514	116685	55569	60339	56203	73397	73303	71040

## Sheet: Figure 2B
Time (Minutes)	Quenched Probe (0.05 µM Probe2)			T1.3			Positive Control (10x Same Length Target)			T1.1			T1.2			T1.4			T1.5			T1.6
0	34717	30974	33283	72018	69496	70287	94770	96616	98407	94107	91935	93719	74061	65421	69217	55531	52850	53188	51966	52703	52718	46813	50257	46864
2	34466	32207	33021	79494	75478	77764	106312	108505	110259	105502	102431	101208	82429	78648	80721	56052	56795	57462	59558	63238	59477	51268	50762	49512
4	31993	32884	31550	89430	91806	94546	119520	123083	122669	112615	113826	116141	94178	88913	88126	56478	59343	60377	61345	58007	61523	49324	52275	53294
6	31388	31392	30908	97094	97280	97826	125853	127736	133594	129065	117903	125452	98418	91839	93161	60716	60439	64003	64016	62874	65259	55026	57599	54850
8	32204	29453	32916	103306	99481	103334	140326	140326	142871	136425	125910	131929	101109	98789	102746	63783	66998	66145	61907	64526	65061	56778	56691	60049
10	27326	30438	28578	104044	109329	108742	145429	146630	142634	142958	137628	132122	109403	102505	107795	65763	63713	67660	66562	68400	67688	56712	58884	53125
12	30472	28199	28939	112023	113973	120313	148334	144731	151286	143383	142744	143849	115004	107357	109119	69466	64010	69025	65763	69111	69221	58877	56691	57892
14	29090	28875	29685	122068	120869	121147	162446	157539	154333	147636	148339	144507	117065	119976	119510	70804	69158	73135	67156	67826	72646	59091	60840	61367
16	28552	27583	27202	125625	126838	127300	163099	165092	158254	154418	155820	157405	123293	117856	122769	72040	73574	72026	75217	77513	72807	60216	58063	61074
18	27592	27405	27605	124736	126475	126028	162175	161933	162116	159950	162299	156886	129859	122365	129084	71900	75831	72027	72420	74573	71591	58602	61574	61261
20	28959	29218	28626	135070	129472	130712	170508	164127	169031	166927	161150	158698	135404	133232	133341	70211	74982	76330	74750	73174	79001	62607	60989	63305
22	27819	29257	27332	128526	133271	135478	167983	165993	167951	161453	162691	158398	134651	130481	131798	71943	73777	76695	75284	78490	82349	62213	62902	63139
24	26466	27879	28229	134321	134972	141860	168076	170431	175703	173214	166807	167248	137773	138729	139153	77336	77635	78122	79724	81826	79146	63173	59272	66351
26	27350	26997	27141	139479	140450	144216	165136	174735	173488	167251	165894	172765	144147	139304	144923	77310	77603	75770	78185	84211	82526	65003	65273	66175
28	24542	26246	25232	138095	143203	140666	173102	169355	173722	170617	166928	167100	145688	138812	142831	82784	82167	80697	81237	81744	80184	62397	64259	67005
30	27635	26986	27512	141935	142794	141423	173016	173594	175109	171439	164723	170592	143967	145734	150488	78757	80275	85691	82154	83600	85873	66198	69668	69727
32	26021	25862	27947	142240	141726	146069	179161	174688	175377	172439	172663	168373	150565	146095	150301	82388	86954	85825	86312	84989	82780	68550	67636	69304
34	25118	26278	27614	142335	144863	149546	175346	176920	177637	174728	178244	174933	151101	151550	153171	83978	85272	84694	81190	86764	87079	69676	68718	68519
36	25757	27821	27598	150418	148599	153704	178258	174834	178864	175581	178084	176220	152263	150803	156437	80243	85867	87662	82948	88569	85446	66873	68984	69180
38	27295	26891	28834	150556	151372	152237	178114	177030	178822	182703	176600	178661	158962	155823	157159	84521	88611	87763	86860	89146	83682	70061	66328	72287
40	26039	27945	28976	150755	150422	147996	181253	180760	179440	177720	180566	182954	162361	158714	158175	89937	87018	92982	87128	86221	88656	69784	70989	73837
42	26431	27856	27508	153723	154635	152939	180113	183637	177948	178822	180454	180988	158395	161651	161913	87473	87233	90170	87354	89380	90079	69598	70156	72592
44	27156	26833	28940	153676	152606	155136	178301	181072	183940	180674	180370	178912	159893	154763	164931	89951	92098	93709	91995	92156	87723	72654	74525	70715
46	26499	26689	28225	148975	153281	155151	175542	181229	188706	181035	179521	184439	161742	159712	165250	90429	94228	89975	92525	93559	89937	69652	71584	75178
48	25687	25633	28181	153781	153035	157252	175622	186688	179160	185019	185005	188871	164919	161762	163828	93877	91263	94433	93485	90459	92529	70810	75454	73778
50	26241	26640	26452	151444	152602	158685	180091	185822	185493	186979	186671	186447	172060	164867	168205	88916	95671	93241	91957	90250	91485	71942	73616	72762
52	26225	27104	28872	151222	156626	158359	181284	188370	189438	184673	187843	183487	174409	169104	171468	94552	96159	96278	95212	95505	95738	72934	75294	75264
54	28167	26398	29008	155424	156498	154599	182645	180791	188161	186822	188740	185095	165971	166711	175673	91139	96095	96498	97529	93073	95477	73214	76443	77179
56	26239	25503	28432	154881	154663	161462	183126	188692	188110	192528	185166	184963	176607	172427	169552	93739	95729	97235	92354	93401	97517	77685	74777	75979
58	27713	28370	29963	161021	162818	162466	184572	184322	183906	186200	182353	189035	170809	176233	179248	93974	95179	96652	97013	96369	95894	77185	74970	78335
60	27520	27309	28037	156956	153952	163554	176725	184066	187417	188371	186252	189694	172991	173557	176525	96053	94834	97822	92412	98969	97684	75895	76342	75895
62	26514	26842	27369	153017	159234	161566	187401	187643	191198	192443	186851	192090	178015	178143	179372	95814	98694	100233	97310	99847	97483	78538	80499	78849
64	26449	28376	28048	153553	158434	163098	189793	187962	187481	189893	188250	184209	174981	175436	180643	97133	98109	105366	99954	100604	96633	79544	80297	79512
66	26726	28482	28864	155290	163998	162054	188426	189041	188773	190762	187432	190398	173887	173969	179378	97972	100622	101325	102562	98359	98614	78245	76610	77023
68	27016	26766	29846	156342	165658	165861	182227	187844	185294	193716	187536	188946	177780	175300	173413	96649	96984	102606	96976	102918	100565	77103	76405	79125
70	28935	27696	29431	160378	159890	165076	182137	189849	189049	188056	191044	191187	178377	177497	182795	97382	103116	102893	101526	104352	99946	76924	78594	79273
72	26102	24992	29288	163933	164688	164502	187243	191847	187713	187743	191945	194194	179395	178265	179336	99863	104884	103535	98490	103596	99818	76870	81801	82474
74	25845	27637	27302	156439	166573	160389	187200	187321	192118	192132	189971	194340	176299	181335	182744	99189	102411	105847	101142	103385	104433	81072	77166	82713
76	27924	27738	28049	158694	163833	163354	184500	189998	191087	192099	186905	194972	176960	185156	178191	102545	102623	106277	102554	102663	100135	82623	80318	83536
78	26874	30278	28023	162182	164974	168772	185825	191915	200430	187045	194511	195162	174611	181481	180526	104633	99269	107123	103280	107569	103136	81475	83607	85333
80	27179	28248	27672	159841	166560	167858	187846	190401	194607	195678	196630	194067	178834	184243	184419	106843	110576	106569	102779	106837	103954	81308	81151	84890
82	27240	28599	29627	160526	164012	171014	193472	193367	194594	192345	193210	196905	183472	183438	191405	105781	105991	110124	102492	104049	105589	81743	81977	85097
84	27510	28735	28362	162427	171535	168631	186655	194157	195245	200786	197997	197144	186609	186301	184644	104771	105729	112185	101990	107654	105174	84221	83126	85028
86	27534	27519	27374	165098	169443	170227	188298	194795	191313	197345	198244	199336	184509	184656	185880	108558	105478	110162	103185	108467	106489	83883	83075	87733
88	26998	26562	29321	164629	166422	169450	190582	192881	194179	193290	196576	198315	187841	190009	188366	106240	111458	107095	104892	109138	106570	81670	82668	85290
90	27292	29206	29046	163717	169717	170856	190164	198934	198220	191353	192162	197193	187571	186312	190292	106153	108619	106143	107194	106709	109073	82432	81919	86937
92	26947	29349	29033	165604	166274	170133	190436	197536	198480	197083	195436	195894	183654	189411	190858	108013	110176	110743	106435	110215	105532	84631	84780	83851
94	29326	28247	29447	163847	170062	167927	190420	197416	195706	198549	200018	193781	186773	187830	193016	112191	109907	110156	107099	110966	107098	81583	86070	87130
96	28277	26446	29741	161160	169700	172088	193837	192617	193121	195228	192872	196952	184558	193968	193194	106223	114046	110281	106847	107635	109660	85143	84840	87494
98	28222	26943	28022	165280	166303	173815	188798	195746	197346	193138	195299	200332	188803	191237	191865	108894	109567	112719	105959	112691	110750	87689	84590	88836
100	27124	27115	28890	163695	168716	167333	189492	192190	198978	198702	196739	196041	187228	187878	197131	112784	111828	114013	108855	110723	107276	83206	85425	88762
102	26245	28404	29799	165033	168771	172727	189095	195592	199278	196749	197195	204027	189292	188963	191961	106596	113309	112176	111384	111612	108740	86672	89981	90086
104	27597	28830	28295	167633	173620	174188	195805	197080	193858	197218	200782	200011	190600	194406	197951	108385	113324	111486	108585	114542	111060	86920	88388	88157
106	26822	27982	28071	169061	172072	173693	188927	195887	195778	203113	199333	198668	188496	192704	197361	111212	113612	116781	113691	109766	107726	89521	92205	88489
108	29114	28293	28786	167129	166211	177646	192797	195856	197239	191458	199112	202037	191368	198078	197015	106621	112329	112715	110661	111837	110533	87962	92404	89674
110	24347	26867	27577	170564	168206	173445	190414	195367	195090	195290	201109	197751	190898	198260	195968	109496	116739	116582	111602	114068	111386	88447	84374	89107
112	29133	26560	27130	164746	172384	175480	190235	195678	196035	195252	204137	201673	191883	196337	200877	114183	114302	111285	108442	114395	108084	88908	89016	88400
114	27370	26438	26977	167701	172023	179192	197269	193026	195313	192627	203906	203320	192286	197152	194661	113756	116289	117938	111916	112509	109236	86779	89673	90624
116	26540	29915	26446	166433	171713	176012	192934	193848	197214	190976	200471	199630	189025	196524	195974	111527	114546	115516	110071	118591	111544	89180	88962	90182
118	27422	28219	28556	166569	176032	174090	194283	202693	199404	198120	203048	194424	190368	191321	198753	109084	116381	121711	107407	119672	112779	87607	90071	92500
120	29975	29142	28900	168294	176873	169809	196948	196622	198088	202301	198451	201901	189957	188237	199189	114301	118616	119744	108069	116490	114088	87570	92507	93075
122	27161	29018	27687	166727	169436	173666	193537	202061	198634	198094	195000	198097	191823	190583	198665	110121	112321	117328	111710	114381	112194	87160	92428	91456
124	27435	29172	26527	166271	173040	171527	192495	194221	198806	195362	195971	201789	192845	192064	198140	112032	114081	118582	112186	112861	114026	90525	91304	89914
126	27560	29660	26807	164885	171301	170461	192759	195102	198006	193047	200833	201633	188004	192707	203323	116296	120769	116058	112093	114777	112168	89697	93406	90429
128	26711	29341	30671	166454	173430	175198	188423	197661	193644	194201	199029	199016	195786	195220	202810	112087	115060	121671	111964	114595	114057	92570	90861	95161
130	25793	27666	29218	167272	173169	178041	187484	196721	199687	196488	200683	202455	189723	196959	195874	106823	119888	118642	114053	114906	114401	89507	93708	92179
132	26358	28142	27681	169809	175726	174718	190606	201846	197335	198322	201173	201338	190751	192970	197398	118147	117314	119897	114765	118657	118056	88739	93097	93296
134	27667	30693	27531	170877	172307	179888	189149	194018	206933	200899	197602	205936	193169	192878	198128	114560	112160	121885	111488	118477	114093	88672	92984	94823
136	27075	28170	30158	161915	173101	174918	192482	199685	204206	200456	202090	204446	191597	198138	197710	113603	118132	117164	113041	117368	114209	89918	92615	96708
138	26667	28425	30578	169325	175410	177168	197468	203864	197764	195258	192669	202703	191823	192785	200479	114176	116880	122610	114741	118598	116004	91496	91750	92555
140	27784	29970	28521	170497	170618	174275	198501	198797	198013	201856	198333	199788	192201	198821	202793	116190	120060	120382	115381	124146	116669	89802	92492	95964
142	25796	28439	27885	169720	175446	176548	187787	198557	199491	199012	201488	205160	195882	195932	207907	112678	118742	123894	115441	116483	116041	92853	91778	90341
144	27924	28336	27979	173681	173006	176081	192423	196181	200897	201120	198723	197926	196473	203446	202466	115943	117430	124478	115900	119284	116257	89532	92489	92607
146	27924	29163	28344	168433	176299	172161	193944	201729	199515	201626	199610	204492	194431	203204	201028	118844	121685	125117	118322	120132	116457	92888	90656	94953
148	27564	27281	28371	170797	175705	174991	191240	200346	204667	197655	205157	198215	196706	200421	204374	117849	121110	120367	113218	121002	119668	89984	94359	97494
150	26114	29399	28222	166431	176380	176878	195324	198989	201588	197521	203578	207261	187689	197671	200757	115459	118069	121907	114128	119434	117153	90312	97741	97906
152	27506	28941	30063	169006	174646	175210	192812	203388	202196	202374	197463	205043	191697	193271	206662	116431	121164	121352	118711	120325	122184	88824	94909	98958
154	29397	28035	28167	168046	173240	174391	196547	199826	198340	199249	202948	204788	194682	199764	203326	122810	122898	123522	119309	120614	112287	96615	95928	96345
156	27304	26104	28989	172331	176044	181734	195142	202193	203733	202957	204665	205090	194131	200319	198749	120649	122561	122915	119047	124506	121078	96698	95068	97609
158	28445	30160	28366	173707	176422	175519	191656	198521	200208	201666	201406	200661	195202	201493	205559	117764	120791	120130	117129	121016	123215	90623	98099	99669
160	26227	29135	28388	172442	179016	178312	197141	197849	206379	200561	202700	207234	198953	199252	201896	117780	121778	128575	117055	123918	114494	97260	95690	98001
162	27855	29024	30553	174365	177924	178011	199405	204091	201901	199209	203499	206169	193345	199107	202051	122762	120122	121791	119805	123779	114307	95847	97495	100661
164	26560	26499	28495	170831	176628	182818	190026	203824	200466	198098	199950	201482	198719	202671	208585	119569	125615	124206	116680	124128	119789	94892	94489	95713
166	26642	28230	29553	171799	177302	178811	198406	197429	206986	208544	205095	202016	192724	201338	204297	120458	125252	125861	119413	122674	117319	94109	98541	96230
168	27944	28651	31013	170012	176978	177578	195718	205745	206991	199959	205049	203106	196634	203742	201395	120443	123080	124434	119292	125379	118175	97152	97467	99388
170	26174	28596	30480	173452	176251	182838	194047	203462	204341	196805	202212	203016	194963	199530	202516	121541	125276	128954	120937	121658	119971	95967	97671	98981
172	28003	28863	28405	172776	179979	180608	196137	199771	200763	200094	200705	205465	196062	201767	199456	116267	126935	125082	119887	123735	122418	94405	97675	97643
174	28332	28479	29375	169096	175408	180606	196979	200960	200565	201180	203209	209608	194483	202239	203761	123729	128267	129405	116800	122579	122428	89944	100383	98034
176	30015	28887	29673	174542	179929	180339	192989	203378	207967	198427	206328	208767	195697	204042	206570	122805	130035	128964	116242	125061	121542	93402	96782	101573
178	29824	28846	33005	172276	174703	182905	197900	203583	201388	204994	202584	204579	197925	202764	208731	122906	125324	129395	120887	124111	122716	95464	102313	101170
180	26900	27998	28930	173919	182669	185506	193890	195637	202599	200374	207221	206487	194261	201150	207473	119441	127283	129991	121463	125305	121277	100470	98670	99956
182	27921	29478	29348	174429	178064	182295	199475	198198	199127	204659	197876	208720	193068	193657	206023	122216	124927	126450	118515	118998	124956	98053	100768	97046
184	27873	27556	29957	172983	179291	172901	192097	203798	205201	200701	203649	210534	197012	204183	203480	123094	125534	124912	119308	124373	120248	97332	98751	104300
186	29788	29368	27061	166721	177085	186363	196317	201233	202467	202729	202316	204991	201647	201390	205519	126460	125568	127800	120871	124212	121809	96949	99653	95147
188	28387	27375	30178	177311	180357	181743	196789	198168	204190	204133	200319	209404	199631	203774	208257	126505	125306	125854	119637	125791	124121	94072	103267	99742
190	27504	30103	30419	175722	176898	183644	199735	210270	205156	201874	206001	211764	199850	203028	209694	126216	129752	129860	115856	123665	122803	99094	100249	102041
192	27118	28106	29350	173002	177553	179825	198101	200638	200741	197133	205689	204850	197079	206110	210044	124757	132242	128956	115652	126705	123951	95406	100385	103935
194	29583	29189	30195	172896	180261	180303	193109	206492	203624	202593	201609	210636	195847	205133	206980	125273	128357	129381	124510	127830	125776	99174	99406	101440
196	29120	29013	29551	173278	179339	179032	194201	207148	207591	200983	201597	204255	198471	200429	207042	125761	131296	129341	125170	124996	123968	98837	98037	100856
198	27300	29065	28465	175652	182639	179972	198287	204548	206280	201302	206087	209022	200661	202223	211444	125094	134479	128635	122519	124741	129364	96460	103855	103452
200	28555	28437	29188	172801	178263	186138	197680	200328	207289	200613	208375	209809	194481	203294	205398	123206	126749	127437	123856	128808	125889	98567	95705	103780
202	26816	29853	29922	174423	179483	179651	196708	205828	205226	208926	209446	205848	195197	205076	207555	126604	125831	127356	126101	133565	120788	98009	100706	103699
204	29096	28709	28172	179206	177036	184241	195597	206787	210157	202785	206749	207082	197868	206639	206870	122487	132384	131217	120351	128948	119997	99976	100289	103676
206	29215	29039	28380	172071	182483	185556	202427	207202	213610	204361	203628	207603	204020	204643	208156	126473	130303	134372	121964	127504	125199	103619	99965	103083
208	28720	27322	28471	178075	182656	187914	202657	205414	208090	200013	205576	212261	198421	205554	206376	124441	128481	128863	121317	124143	119098	99937	100410	99924
210	27100	28272	28565	176631	178276	182375	200482	203531	209691	198876	207548	206486	197566	206333	215062	126622	129237	127470	124567	127216	121722	99358	101165	101313
212	26114	27325	29389	171750	182353	186049	197806	203877	201792	197903	202593	200685	194645	201017	210940	124853	128738	127914	118934	131720	123730	98656	103211	103749
214	28208	28930	31446	175041	179545	184040	200813	199948	207066	201241	204964	208695	192692	202689	207820	127457	131438	131161	126698	129190	129312	99635	105183	107350
216	26742	28907	30359	173707	184865	179976	196141	199236	199428	200357	209083	204526	194583	209522	208603	128148	130325	130209	122076	122743	125704	99192	103919	100874
218	28796	29329	30282	175786	180615	180298	196602	206191	206511	200378	207663	211283	194061	206315	213190	125662	128306	133573	123822	126618	127022	99472	100707	106608
220	29496	29309	29830	176579	180586	186758	196499	204243	206209	207081	206411	208157	197326	203896	206812	125309	130194	132623	124415	126727	125018	101405	104379	103480
222	29785	29110	29540	175948	183652	182781	193367	200205	203461	201230	209013	207288	195650	202884	208285	124793	126474	134072	120199	132484	123816	97622	102013	101245
224	26042	28448	31110	171028	182295	181096	197002	203873	205901	205687	199724	210878	199803	202498	213013	125461	128921	130445	122158	128063	126628	100696	104559	106498
226	27955	28750	28548	173524	185536	185773	197113	198454	206739	204781	202220	208188	195841	203691	209968	129568	131903	130636	123456	128674	125157	98959	103444	106460
228	28527	30150	29567	172101	185369	181332	199682	204329	211721	203325	202337	207146	193896	204716	207606	132462	127900	134358	123210	128548	124671	101307	104447	107314
230	26960	28476	30141	174662	182413	186710	194941	211007	207281	201562	208303	207242	200151	206836	211493	124302	130784	131859	127502	128777	125622	102775	106374	106433
232	31976	30819	28615	176434	181698	183679	196843	202508	206067	207139	209512	204917	195139	206724	208548	125819	132502	132507	122950	128520	131079	98898	103549	104803
234	27310	28235	31338	174067	183024	180983	197091	207975	208507	204168	208216	209348	198027	203382	209030	131041	130183	133342	123870	129908	129268	98556	104881	105304
236	29529	28117	29708	171705	183976	187530	203689	205676	207905	198934	205388	211958	197770	201188	209702	125953	131653	136152	123729	129409	123474	102821	103197	107251
238	28879	29256	28421	173914	181194	189050	199307	207035	204924	205977	207826	203510	197920	200060	209284	129689	132217	135170	123884	128723	124510	97673	106404	107224
240	28592	28586	30215	172413	185058	180516	193945	206988	208102	197514	202316	211719	195942	209855	210525	124066	130590	132078	123731	130157	131505	100527	102895	105841
242	27958	30940	31408	171149	186085	183184	192371	202651	209932	202276	203965	207515	202530	204052	208368	124840	133342	134233	128131	129824	126321	103484	104559	109228
244	26311	28196	30211	173778	179110	184574	194447	206938	209486	202583	209549	209388	199896	200865	209048	129508	134156	137026	123822	134438	127313	102339	107841	102538
246	28815	30354	31397	177147	184154	191598	195950	210060	205858	207752	207074	209554	194639	204914	213040	130536	133420	139116	126576	132467	127252	96986	106521	109292
248	28872	28437	30710	175065	184365	185172	196933	203678	207916	204146	203855	207960	198528	200480	208944	126259	132502	131283	129776	133422	129831	101920	110539	106834
250	28108	29463	30102	175554	183508	185916	199778	210992	207693	199400	209401	207486	201077	204194	215616	132152	132213	133853	126239	135988	129917	105621	105117	100378
252	30311	29277	29120	174069	186712	186970	194076	204202	207663	202546	207390	209912	201649	206662	211396	127442	135893	134098	125864	131571	128839	104814	103026	107974
254	27827	30348	30542	174476	181111	183332	196946	203271	211885	203138	208740	210502	192397	209931	204884	132052	130362	134780	131215	130972	128044	104253	106098	110712
256	27106	29529	29799	177479	180475	182053	200222	203838	206218	200613	211975	211310	199938	205625	213286	128935	134862	136485	126492	133199	129598	102977	110051	108601
258	28798	28829	31048	178615	183051	186061	194240	202747	207835	203097	201055	211752	201803	208347	211102	127426	135197	133526	126172	132914	132022	103523	106818	109307
260	27709	31340	29378	181260	186083	192879	198365	215074	208161	204300	208363	207817	198415	203549	210071	134100	139127	134004	127706	134375	126417	99591	106323	106885
262	27831	28652	28789	176021	181831	188476	193460	207896	208533	205037	203763	212446	205125	205764	210912	122769	136663	134080	129154	134005	127134	107733	102596	107240
264	28363	29040	29741	175648	186910	184737	195380	206030	205800	201596	206120	208189	198938	203731	206889	126794	134293	138953	130229	130892	127419	105797	110123	102547
266	29013	31376	30744	171020	180944	187542	194693	211912	211832	201891	205013	214515	198046	206204	211967	129165	134784	138378	126764	132494	130268	102709	107589	108480
268	30709	29628	29092	176199	182015	187897	195873	201401	210988	205990	205404	207005	201455	207210	204621	130357	137528	135579	125672	137444	134412	104330	105479	104727
270	27245	28190	30363	178439	184225	186639	193186	204185	211485	202877	205628	216093	200862	207475	212632	133694	136366	139154	127366	129767	130821	103126	108709	108614
272	29259	29815	30510	176514	183944	187351	197782	209388	209784	203123	207137	210099	201342	207269	209835	130079	135453	134644	129389	130693	131920	104996	107386	109092
274	29442	29141	30403	175338	184706	183335	194397	211702	206353	198133	208758	212533	194498	205592	208964	133828	136761	136847	126357	135236	131334	105329	103654	104893
276	27683	28635	28663	176747	186873	182770	197454	202668	210814	203618	205756	208409	196029	211698	213471	129419	136524	136957	132140	130508	130301	100948	108534	108723
278	28738	29450	29787	174427	181811	186084	197626	205045	206051	202920	210720	210964	203261	211091	217113	129491	129832	136829	124528	134351	133143	108742	109274	110122
280	29696	29995	29471	175335	187173	188883	195513	208952	210155	205394	209759	209386	199874	205865	207879	133512	137968	137844	127089	136546	130022	107844	109238	110382
282	29612	29795	29158	173793	189173	182862	196322	203654	208697	204593	210172	213130	202479	208126	213898	130183	136451	138250	133866	133102	131062	104657	109671	108985
284	29589	31056	29297	178578	185070	193641	200767	206924	210032	200687	210556	212050	197737	206840	211533	130578	135934	139315	125111	136308	127176	106528	108189	109442
286	29357	29862	29016	173120	179215	188810	203963	206916	211163	203890	214200	213546	200080	209503	209835	131390	135623	139424	132271	134991	131110	99497	108584	113091
288	29852	30161	31367	171983	184408	192609	200903	205873	208917	204681	212376	207208	195692	209393	213403	131212	134352	136735	129635	133505	131983	104154	106012	104822
290	29843	28873	31615	179591	182766	191656	198969	207914	213655	208969	212089	210292	200377	209638	210588	129293	136471	142366	127830	133842	131567	108943	105610	111892
292	31062	27946	31574	179934	186497	193396	194430	208106	210877	201124	214628	207778	199746	213093	209473	132423	139904	138127	126083	133892	131376	103516	111722	109676
294	30933	30014	29470	176088	180445	190773	198639	205975	213537	205848	212531	210115	202352	211086	212371	138613	134661	141492	129477	139162	132263	102203	110737	112093
296	30128	30260	29069	179759	181768	187607	201767	208228	211230	201194	213107	214707	195858	207603	207433	130447	137512	134344	129287	136776	128000	101883	107636	110239
298	29258	28783	31315	174752	185938	185926	194791	199871	211140	206832	206357	212563	191765	209640	214213	132042	137223	139502	126092	137124	133740	103730	109802	112707
300	27382	29699	30179	171892	183008	190977	196687	200957	205649	199135	209951	211531	200474	206445	206525	132624	137153	138201	127466	140068	133522	103062	111033	114527

## Sheet: Figure 2C
Time (Minutes)	Probe 2 Trn-1			Probe 2 Trn-2			Probe 2 Trn-3			Probe 2 Trn-4			Probe 2 Full Length (44 bp)
0	80353	67889	68616	105043	117809	102813	98811	92002	89500	45648	46427	49301	72018	69496	70287
2	99263	86677	101150	163774	147504	151880	162595	165357	151819	67079	66097	67938	79494	75478	77764
4	120659	116979	113240	192704	207568	185291	206473	218055	200212	84470	82558	93008	89430	91806	94546
6	138787	128125	122813	235054	231627	213115	234067	240019	239720	113106	105626	115873	97094	97280	97826
8	142072	132238	134832	249194	231979	244440	268021	270917	271105	135879	122953	143484	103306	99481	103334
10	164937	138837	149043	279554	272146	261148	283221	286288	285978	157071	143418	165613	104044	109329	108742
12	173622	147275	148884	272516	285627	283136	322225	310044	295612	181640	167661	188449	112023	113973	120313
14	172318	158593	172735	282195	284837	295484	324764	330322	316278	197167	188523	207607	122068	120869	121147
16	174371	175055	166668	302601	291717	287968	332251	341607	337626	219723	202877	221505	125625	126838	127300
18	191229	166203	166906	302890	294062	290204	334555	346599	324612	235095	217344	248410	124736	126475	126028
20	192236	179739	178846	311130	288844	290080	357758	353954	340822	252761	230687	263056	135070	129472	130712
22	188110	181878	181267	338375	306963	310209	352545	363998	342505	265420	241939	279697	128526	133271	135478
24	196504	172867	193181	329304	309694	307862	358309	370014	364925	277158	253973	292197	134321	134972	141860
26	199564	181686	191034	323516	323648	317657	360268	377557	347135	286867	268088	310165	139479	140450	144216
28	200453	181286	186985	321406	309755	310298	366965	375248	353513	300172	277340	309741	138095	143203	140666
30	206193	182069	196420	323481	322934	320096	372190	360782	345871	307871	286362	322820	141935	142794	141423
32	206618	192547	209923	336864	322799	314453	383126	373047	366317	317706	300298	330373	142240	141726	146069
34	204256	196900	193858	344005	326038	331013	380137	364076	373998	324830	296488	338786	142335	144863	149546
36	204780	185973	180916	326262	326860	322885	362818	380790	369181	325273	305719	347656	150418	148599	153704
38	209141	189362	201585	342967	325982	325717	383916	358538	373503	335891	306762	348834	150556	151372	152237
40	214685	190607	202154	350654	327548	322701	371222	390465	381643	345758	321226	347985	150755	150422	147996
42	215198	191345	190694	331480	337006	344739	378879	390842	376373	342890	319168	363950	153723	154635	152939
44	222347	197052	200708	360744	336507	311951	375112	367291	377702	358081	323707	364465	153676	152606	155136
46	225142	188698	199844	338196	335080	332552	393498	381612	369974	360526	328160	371829	148975	153281	155151
48	204268	198438	199496	352384	347511	326036	384317	388080	388653	363924	331556	372770	153781	153035	157252
50	206800	180134	197548	339498	338264	326962	387004	390064	370833	362231	333979	370558	151444	152602	158685
52	208871	202339	204372	342996	338289	343778	404189	398011	367803	361616	334826	377948	151222	156626	158359
54	223757	191420	210767	374876	341317	347005	370544	369022	386317	369899	338395	377775	155424	156498	154599
56	222899	206655	208229	349765	341584	343683	376144	397691	355950	372432	340054	384461	154881	154663	161462
58	223178	199216	203759	355075	343966	346905	385338	395167	372996	377346	344391	382843	161021	162818	162466
60	211107	202403	208028	343960	353183	333621	385326	405272	376444	377946	339372	387298	156956	153952	163554
62	218043	197862	202318	356248	349488	340305	383361	381967	393946	372274	337641	385235	153017	159234	161566
64	219076	181903	210970	352212	333609	335805	373586	379223	400442	372239	344074	387633	153553	158434	163098
66	227128	197631	194544	349781	333976	339773	396202	372390	383343	373455	346369	386294	155290	163998	162054
68	215208	204861	194938	362087	359005	340397	387800	391389	382224	392798	342880	394516	156342	165658	165861
70	224348	188504	201382	345445	342883	329075	390568	382097	388545	382540	355718	395131	160378	159890	165076
72	224226	206667	215389	365555	343343	348918	398339	400350	371159	384273	351048	398482	163933	164688	164502
74	221704	212806	196933	369958	351168	339398	387426	389162	382803	389579	356101	394668	156439	166573	160389
76	227150	188507	209367	358987	348578	336852	389310	390706	382654	387910	358224	388755	158694	163833	163354
78	225432	205831	210731	348028	344432	352164	399555	384901	392472	385771	352748	404416	162182	164974	168772
80	212670	186732	212192	361879	349610	337941	374546	381771	378933	382395	356879	394844	159841	166560	167858
82	227463	200705	205442	376567	355480	343996	392357	384529	380174	382519	354476	397955	160526	164012	171014
84	212206	212789	213331	356546	321927	351248	387179	390552	387149	383574	353454	393200	162427	171535	168631
86	219316	218872	207763	371990	350932	357344	386759	393466	374823	386712	361020	401642	165098	169443	170227
88	214611	221129	203356	359078	350847	333406	394216	391301	386978	387870	351252	399675	164629	166422	169450
90	220935	212925	210726	354259	342517	351842	395917	387531	389277	393323	363521	391322	163717	169717	170856
92	222388	208467	207829	350239	351501	343668	395461	393344	375035	387813	360084	398399	165604	166274	170133
94	222677	190766	213570	349955	338599	340499	397286	394130	369319	392264	349981	398529	163847	170062	167927
96	216650	213053	206270	358664	339308	364162	416392	398246	396849	390949	361483	396540	161160	169700	172088
98	224551	199990	210584	354816	353683	366862	400124	385795	375699	390734	351057	397532	165280	166303	173815
100	225040	204442	212475	366894	348026	347510	406810	404950	389196	393234	362870	395372	163695	168716	167333
102	220878	202011	208977	369093	342163	339741	393397	392098	395225	389524	360331	398915	165033	168771	172727
104	221915	213702	201141	361801	344572	337268	408221	395848	399494	395989	358654	405744	167633	173620	174188
106	224116	212724	215441	359246	335074	360889	399180	420593	386175	400112	358641	403737	169061	172072	173693
108	222707	208634	209404	365762	348942	355310	394639	385553	386036	387348	362009	399328	167129	166211	177646
110	229271	197846	207020	367770	349614	336156	390350	406751	392085	395983	359311	406157	170564	168206	173445
112	229888	189360	214867	358961	362559	362067	384803	400388	384626	387420	359109	391381	164746	172384	175480
114	225262	204373	210276	354538	345368	358690	403338	395065	411524	389025	360723	405535	167701	172023	179192
116	212644	200566	211877	359428	348102	341014	407830	426647	375417	393273	365115	400607	166433	171713	176012
118	229442	214973	205250	363773	357273	353854	399472	399506	395932	391804	362500	397068	166569	176032	174090
120	222555	195734	210769	376445	369999	345966	390548	388432	397998	389693	356097	403760	168294	176873	169809
122	228759	210272	219225	362667	350822	331003	377527	410197	388896	388437	354636	404483	166727	169436	173666
124	230908	224950	220264	353715	357093	346965	387755	397739	398172	398412	369053	398661	166271	173040	171527
126	222456	195143	210738	349870	348987	360911	408016	411840	388022	392253	356813	397013	164885	171301	170461
128	226288	197539	204907	366478	363376	348912	408833	402613	410831	393381	356602	407302	166454	173430	175198
130	246888	218362	217563	366866	359008	349728	391492	398237	397448	396534	357586	403439	167272	173169	178041
132	223694	211789	224739	355280	350632	343509	416130	407091	412998	392629	353546	399733	169809	175726	174718
134	214237	209690	218150	380435	361151	346741	395599	381988	383540	405003	362642	398919	170877	172307	179888
136	230784	211436	215211	357283	346670	358954	398358	407773	385739	383992	364302	406272	161915	173101	174918
138	233008	204859	218559	365334	363047	338728	394810	409488	380380	396942	363538	405984	169325	175410	177168
140	214231	213565	211825	387622	360769	361793	412097	398314	380757	391449	361398	408839	170497	170618	174275
142	218251	214143	203652	358521	359898	355659	391780	413488	382188	388185	360217	397922	169720	175446	176548
144	222617	204809	204776	372650	346271	361956	392057	384858	392270	402327	363885	399623	173681	173006	176081
146	233984	215973	201681	384342	369517	355796	389881	398952	383974	390506	362512	399261	168433	176299	172161
148	231288	202422	210333	361212	358468	341330	395915	406075	393601	401200	365437	406800	170797	175705	174991
150	220511	210441	218694	353856	352072	353275	402891	417128	384358	392695	369889	401677	166431	176380	176878
152	229231	213523	218274	360897	359508	352647	394126	393404	402059	391543	364927	399861	169006	174646	175210
154	222525	226323	218658	379718	364296	358983	391977	410970	384043	386182	363386	401665	168046	173240	174391
156	209555	207855	217275	386540	373115	361318	402351	407794	411779	392264	364149	405199	172331	176044	181734
158	234311	213701	211345	368091	356952	345529	411337	381903	399861	397001	363890	401843	173707	176422	175519
160	213670	200050	220792	361336	373911	362884	419505	408486	392485	395914	359371	403468	172442	179016	178312
162	236833	199184	208516	349727	369686	352610	390914	414992	388863	389297	358966	404964	174365	177924	178011
164	224446	214405	226056	372674	364183	364610	395847	409233	394598	394611	361716	410164	170831	176628	182818
166	217569	218435	197606	371331	368970	353083	406599	395874	389524	389176	362036	400263	171799	177302	178811
168	227801	221877	218886	377045	365051	355515	403730	415332	405818	391266	355076	401408	170012	176978	177578
170	228107	213444	228763	374972	361525	356810	418603	404133	381776	384744	362102	399139	173452	176251	182838
172	234913	211002	204185	361697	370914	349144	395929	423747	377781	391339	359251	392869	172776	179979	180608
174	236008	207968	216417	364771	357544	342858	410367	411684	392654	391939	351955	398645	169096	175408	180606
176	227286	219269	206826	367579	360690	339210	414158	406455	395086	386631	353719	394978	174542	179929	180339
178	218876	199268	203609	371273	357481	373338	386318	414458	384640	391740	365466	396017	172276	174703	182905
180	230107	212366	219025	362946	363500	357619	412629	411497	395463	382188	356496	397330	173919	182669	185506
182	225010	207131	209300	375197	374982	360735	388331	414366	391453	393738	357593	404270	174429	178064	182295
184	226352	208533	197300	367053	373364	349395	410062	404063	370275	384519	363615	399432	172983	179291	172901
186	222277	218703	223606	382441	367028	341865	392617	427228	384126	393483	361291	398466	166721	177085	186363
188	233353	206209	213970	354934	372509	380196	393540	416397	394871	394611	363636	400561	177311	180357	181743
190	231011	208431	225044	367431	362913	358811	412898	417250	385329	382854	363541	399747	175722	176898	183644
192	228774	221806	222439	383478	368280	353008	398109	415977	381126	386040	365391	403310	173002	177553	179825
194	213101	218191	217712	357319	348968	350136	403240	398637	383932	390646	365674	402393	172896	180261	180303
196	241105	205042	214410	363226	378621	348704	444155	406781	372850	388340	360799	400585	173278	179339	179032
198	227667	208302	210586	383341	349722	360347	413661	405472	395430	396874	366358	402158	175652	182639	179972
200	224921	211656	212572	363719	364695	353760	416049	424548	383171	386407	366049	401304	172801	178263	186138
202	232465	203329	217365	356448	372267	358363	405822	410854	388992	392153	360466	399293	174423	179483	179651
204	217891	210848	214481	375511	369831	358035	408750	407746	401218	391345	365906	403449	179206	177036	184241
206	245595	206646	203835	377236	364157	342134	397320	395673	407574	387184	362831	403760	172071	182483	185556
208	232898	210339	209008	383944	346901	349712	411724	405961	406042	387160	369097	402305	178075	182656	187914
210	228797	196625	219525	372743	369616	348346	410317	403108	378925	388198	360478	393883	176631	178276	182375
212	235066	221768	222660	387872	371511	357824	399333	406654	399145	391226	362567	397854	171750	182353	186049
214	231245	212799	210043	356615	375078	344949	414383	424609	400167	389048	363513	399766	175041	179545	184040
216	240727	214431	233494	383558	381389	354725	413958	424886	393008	388368	363823	394781	173707	184865	179976
218	225184	217816	208500	374629	362678	338988	405880	420705	405643	392825	365249	394200	175786	180615	180298
220	218295	204120	219028	378499	352501	356682	409802	412921	391226	382704	364704	403846	176579	180586	186758
222	220657	217939	209184	368365	372509	367662	405429	403796	392001	385290	363441	398728	175948	183652	182781
224	233073	222956	214958	378058	359021	348441	412187	403021	399410	385531	365612	392506	171028	182295	181096
226	213572	208583	215200	366914	368445	364612	404671	415793	396100	389327	362248	398513	173524	185536	185773
228	228600	213194	227786	389449	351580	346014	397673	417545	402068	390580	363666	401417	172101	185369	181332
230	236685	225571	208887	384005	362690	354167	409905	413626	378591	391148	358782	402366	174662	182413	186710
232	232556	203945	221221	372514	362196	354164	418103	398091	379523	386408	366164	403536	176434	181698	183679
234	231401	220575	216278	360800	369595	348997	407455	424598	391283	390092	362822	398707	174067	183024	180983
236	234757	219143	216014	373223	369360	359080	400091	409755	401214	389121	361807	402416	171705	183976	187530
238	226910	212476	222766	374444	373656	352694	412229	414894	397138	390987	362408	397602	173914	181194	189050
240	226258	226166	210578	376453	367360	345623	420864	428791	384200	388518	364937	402437	172413	185058	180516
242	226960	214138	215106	389829	368065	363297	421952	411947	386126	383257	368364	395513	171149	186085	183184
244	236893	202621	211227	353456	367546	365425	406270	411830	386448	389005	365814	399899	173778	179110	184574
246	222960	211912	213612	358908	377898	371245	388387	417042	414059	385494	358459	394911	177147	184154	191598
248	224669	205409	206152	383662	360024	359034	410153	414664	408649	388872	363507	404030	175065	184365	185172
250	230640	221740	207774	374005	362207	350166	406016	427649	378925	396041	366880	403017	175554	183508	185916
252	224973	210536	208883	361735	368312	378544	400805	420935	394847	384305	365834	394786	174069	186712	186970
254	240189	221549	222330	354816	363440	336280	401617	411938	390532	382167	368516	393490	174476	181111	183332
256	224414	215442	218103	373284	371338	339646	415699	429879	389761	391223	359610	396437	177479	180475	182053
258	238069	220383	218764	384340	374132	355459	411002	416609	382212	389018	363123	401096	178615	183051	186061
260	230223	208402	215084	390079	378085	357112	405732	407598	392034	381604	356684	391495	181260	186083	192879
262	233019	225575	229874	383946	377954	356626	402627	430902	405684	383643	360800	398013	176021	181831	188476
264	226416	214543	217725	367747	367387	368483	393698	418360	394295	378938	362162	393843	175648	186910	184737
266	235207	208420	213600	379846	359859	361186	416842	427450	387301	387465	367066	399431	171020	180944	187542
268	224735	209786	225154	374713	356319	362872	415312	416065	383030	383726	366154	390207	176199	182015	187897
270	231859	214956	213185	373719	364850	359816	407050	410422	391800	381895	360612	386037	178439	184225	186639
272	226539	217247	212651	365039	367845	365795	403921	423875	393798	377808	359157	397111	176514	183944	187351
274	233396	207765	226399	357465	368047	343743	413728	405177	391097	381575	354869	398397	175338	184706	183335
276	229042	210439	224237	376586	363757	350976	404162	418791	374823	384155	355237	391922	176747	186873	182770
278	225299	220231	212457	375894	372866	352522	418192	430474	377755	378171	361135	389242	174427	181811	186084
280	228192	219922	215258	369142	368523	379914	399037	429685	384194	378625	357332	391016	175335	187173	188883
282	230713	228591	227662	371375	386089	362397	417232	424732	386031	385197	359617	395982	173793	189173	182862
284	221745	220296	216422	377418	384783	357454	411194	407638	381056	383847	356869	398682	178578	185070	193641
286	227256	216483	207086	372405	366249	350138	411425	433765	398768	381417	356476	396957	173120	179215	188810
288	224831	225073	211940	368305	368224	354749	415534	412979	406992	385555	354955	388896	171983	184408	192609
290	243220	205306	221014	369277	351912	369200	395880	426026	395112	386194	362268	393413	179591	182766	191656
292	234344	221859	217736	378874	363296	356674	413091	415235	408935	379898	360030	391433	179934	186497	193396
294	232278	221540	200907	375294	363407	350595	427173	422428	399711	378368	358611	390567	176088	180445	190773
296	228836	219150	212248	386644	374646	362276	416612	424310	390097	386317	359286	394173	179759	181768	187607
298	225951	213405	209097	384800	374952	350602	410830	410436	400250	375927	359123	393029	174752	185938	185926
300	229663	218082	217075	372059	375371	352533	401966	399771	398487	379971	364246	391175	171892	183008	190977

## Sheet: Figure 3B
Time (minutes)	5x		7x		10x		100x		400x
0	1.01703	0.050981	1.01791	0.044263	1.01912	0.048346	1.03796	0.056862	0.988786	0.069197
2	1.01899	0.05577	0.996436	0.036328	1.0258	0.035114	1.13381	0.060664	1.02217	0.050834
4	1.03171	0.054411	1.04339	0.036809	1.00158	0.04721	1.06203	0.083231	1.14563	0.060139
6	1.02962	0.049341	1.01929	0.043073	1.01236	0.048186	1.13085	0.06207	1.15321	0.064526
8	1.05423	0.035691	1.039	0.023198	0.982848	0.043827	1.19933	0.104172	1.20942	0.064201
10	1.0696	0.042385	1.04593	0.047533	1.00124	0.038515	1.2174	0.138011	1.2187	0.019147
12	1.07295	0.078575	1.01323	0.032475	1.03292	0.048374	1.32081	0.061983	1.27336	0.081386
14	1.07199	0.072734	1.04335	0.016866	1.02633	0.017402	1.2363	0.091304	1.32205	0.080543
16	1.08394	0.084711	1.04237	0.053176	1.06368	0.045693	1.36871	0.086374	1.26843	0.082224
18	1.08242	0.081844	1.0453	0.037005	1.02848	0.055406	1.47529	0.051548	1.40027	0.108105
20	1.07891	0.064937	1.06918	0.04858	1.05859	0.024289	1.45382	0.07894	1.46219	0.079764
22	1.10255	0.057013	1.06972	0.028167	1.05198	0.029618	1.55648	0.104322	1.50779	0.057172
24	1.06676	0.032483	1.07784	0.025642	1.0834	0.024989	1.52096	0.104459	1.6223	0.091835
26	1.08322	0.034596	1.0832	0.024219	1.03633	0.026056	1.5498	0.14494	1.52718	0.056198
28	1.07497	0.013274	1.06427	0.038177	1.0807	0.064142	1.46099	0.086446	1.52665	0.073721
30	1.08245	0.054459	1.09171	0.051483	1.0433	0.023702	1.5677	0.113627	1.5664	0.120302
32	1.10691	0.064558	1.08783	0.035316	1.07021	0.027081	1.61213	0.124789	1.60299	0.152959
34	1.09015	0.034929	1.05866	0.044633	1.08816	0.018586	1.59596	0.110061	1.55436	0.114801
36	1.10798	0.043851	1.10747	0.044935	1.0792	0.035723	1.68003	0.081734	1.55818	0.156573
38	1.11156	0.057852	1.10726	0.039528	1.04706	0.031868	1.50065	0.084345	1.61997	0.070869
40	1.09504	0.082739	1.10204	0.053558	1.06671	0.021596	1.69978	0.047864	1.66705	0.177035
42	1.11383	0.013249	1.07939	0.027652	1.06888	0.018314	1.62612	0.086393	1.62104	0.061235
44	1.10529	0.036836	1.07552	0.018568	1.09853	0.021384	1.64679	0.132941	1.76139	0.082533
46	1.10165	0.048578	1.08842	0.028295	1.0679	0.045649	1.64015	0.066464	1.64171	0.14741
48	1.1113	0.053981	1.10254	0.035525	1.0602	0.019091	1.58213	0.07678	1.68647	0.046591
50	1.10754	0.075386	1.11533	0.02915	1.07269	0.008861	1.63744	0.12994	1.68541	0.110367
52	1.10289	0.029999	1.08811	0.027159	1.08318	0.0018	1.7137	0.114266	1.80369	0.140827
54	1.12102	0.043551	1.09071	0.024392	1.08472	0.047264	1.66817	0.053331	1.7633	0.111683
56	1.11521	0.031558	1.07794	0.046445	1.06819	0.038791	1.66149	0.11029	1.75595	0.13261
58	1.10207	0.05403	1.10026	0.031959	1.08559	0.01466	1.64648	0.119343	1.69944	0.175481
60	1.10924	0.058899	1.10776	0.023856	1.08428	0.021897	1.63177	0.109255	1.79291	0.101378
62	1.09202	0.021554	1.07961	0.024943	1.09204	0.055664	1.69072	0.091019	1.72109	0.151131
64	1.12831	0.032651	1.06788	0.024934	1.09536	0.028185	1.64608	0.079276	1.80847	0.102126
66	1.10873	0.035588	1.0826	0.018191	1.06797	0.030497	1.57375	0.067079	1.7589	0.176193
68	1.1054	0.029793	1.08613	0.01268	1.05465	0.012253	1.77038	0.140478	1.82525	0.133982
70	1.12852	0.04853	1.09779	0.039979	1.07522	0.050895	1.66246	0.160672	1.84103	0.067656
72	1.14307	0.041519	1.12703	0.043157	1.07727	0.013856	1.71696	0.101116	1.7751	0.137965
74	1.11847	0.014702	1.08075	0.031292	1.07115	0.027362	1.66998	0.068353	1.83255	0.143683
76	1.13435	0.050437	1.08447	0.042216	1.09614	0.042271	1.65783	0.060727	1.86169	0.162217
78	1.1312	0.055302	1.09184	0.040568	1.08989	0.025881	1.70568	0.069911	1.87824	0.159868
80	1.13126	0.058402	1.0996	0.042462	1.09373	0.02697	1.54434	0.172768	1.76377	0.16657
82	1.13188	0.017395	1.09928	0.035133	1.09118	0.034818	1.67968	0.065376	1.79518	0.099035
84	1.15206	0.035973	1.1128	0.048112	1.07551	0.008388	1.63651	0.077729	1.76933	0.137765
86	1.14337	0.047497	1.10799	0.047487	1.09781	0.033219	1.69942	0.066442	1.85949	0.145679
88	1.15594	0.077272	1.11956	0.048289	1.07406	0.050946	1.74305	0.121648	1.86593	0.066797
90	1.14119	0.07335	1.09814	0.057683	1.12569	0.030087	1.71769	0.060889	1.76493	0.14742
92	1.12971	0.010318	1.08485	0.031766	1.06949	0.02599	1.6805	0.035564	1.86496	0.134376
94	1.13322	0.042058	1.08289	0.040193	1.08485	0.02191	1.68024	0.106333	1.79314	0.133015
96	1.15173	0.028539	1.07645	0.055273	1.08317	0.00999	1.63444	0.132337	1.84471	0.073194
98	1.13537	0.016949	1.08395	0.045279	1.08595	0.041035	1.73104	0.109888	1.83342	0.156856
100	1.14159	0.030147	1.09176	0.032467	1.08862	0.010696	1.64663	0.099636	1.82539	0.153774
102	1.13119	0.027486	1.09632	0.020738	1.1233	0.01196	1.64685	0.148939	1.74866	0.147042
104	1.13951	0.05911	1.11061	0.040105	1.09526	0.030107	1.71947	0.154941	1.78586	0.147147
106	1.14908	0.035737	1.09096	0.047979	1.08283	0.016635	1.65115	0.039101	1.80459	0.164592
108	1.12231	0.020184	1.08959	0.024338	1.10439	0.04612	1.63593	0.087501	1.79969	0.154896
110	1.1261	0.017117	1.07767	0.033996	1.09697	0.016269	1.64323	0.102675	1.82877	0.147745
112	1.11386	0.046919	1.08385	0.031245	1.08779	0.036176	1.69134	0.062643	1.72158	0.136016
114	1.1305	0.02342	1.07358	0.013424	1.06937	0.036365	1.66593	0.110963	1.8261	0.105409
116	1.12047	0.010563	1.08677	0.04018	1.05933	0.023349	1.71049	0.056619	1.78711	0.197316
118	1.13169	0.015999	1.07524	0.020932	1.08756	0.016794	1.66435	0.199219	1.79317	0.130959
120	1.11274	0.058473	1.08521	0.028471	1.05406	0.042155	1.66373	0.116513	1.811	0.131126
122	1.13886	0.05642	1.11705	0.048671	1.07504	0.015325	1.63303	0.110386	1.8672	0.17539
124	1.12551	0.029689	1.07075	0.039167	1.06954	0.033016	1.66983	0.157804	1.81515	0.109751
126	1.12603	0.0338	1.09421	0.042091	1.07394	0.037182	1.67467	0.182362	1.75447	0.129483
128	1.13497	0.046245	1.08762	0.033568	1.06706	0.031024	1.70701	0.170666	1.81897	0.148552
130	1.1371	0.038166	1.10316	0.032929	1.09074	0.034974	1.68488	0.058176	1.83445	0.16922
132	1.14441	0.027485	1.09091	0.030318	1.08534	0.019351	1.61296	0.085779	1.79661	0.114608
134	1.14031	0.031765	1.07265	0.048656	1.0806	0.042696	1.5385	0.076781	1.82938	0.175154
136	1.14418	0.024123	1.0512	0.046052	1.05471	0.035878	1.81419	0.118314	1.7938	0.1144
138	1.14095	0.009889	1.08549	0.016522	1.07588	0.019573	1.65183	0.160225	1.89385	0.126262
140	1.12507	0.034362	1.08085	0.046093	1.0724	0.0303	1.65787	0.106122	1.89316	0.181189
142	1.13385	0.038256	1.06729	0.03174	1.0774	0.021326	1.57488	0.058667	1.91885	0.204012
144	1.1132	0.022274	1.07506	0.009826	1.086	0.029117	1.66217	0.157312	1.88317	0.137435
146	1.14098	0.034259	1.10207	0.023196	1.05514	0.006899	1.609	0.08116	1.82895	0.144772
148	1.13228	0.023509	1.04627	0.034578	1.07769	0.023985	1.66521	0.084734	1.84811	0.209119
150	1.13152	0.0426	1.04969	0.043544	1.08627	0.024883	1.63344	0.155165	1.78477	0.108604
152	1.13388	0.043409	1.0948	0.010817	1.08031	0.020109	1.65017	0.148809	1.89331	0.189678
154	1.13888	0.043651	1.05173	0.026225	1.09167	0.005085	1.63265	0.145885	1.75648	0.134203
156	1.12942	0.023421	1.05065	0.024437	1.06468	0.017703	1.61519	0.161934	1.84232	0.134027
158	1.13094	0.050292	1.0783	0.038252	1.05206	0.024098	1.69961	0.165431	1.75099	0.1381
160	1.13601	0.021528	1.0815	0.030391	1.0675	0.012028	1.56579	0.085526	1.76618	0.147425
162	1.12826	0.038283	1.06465	0.022252	1.05118	0.029677	1.61712	0.071736	1.75372	0.09388
164	1.14783	0.021038	1.06029	0.020235	1.10016	0.019458	1.64004	0.12777	1.79465	0.105588
166	1.15265	0.028987	1.06299	0.038636	1.06151	0.020927	1.68488	0.092437	1.86108	0.077612
168	1.14612	0.031257	1.07038	0.041796	1.06359	0.032166	1.54926	0.11835	1.79513	0.138907
170	1.14597	0.040768	1.0722	0.038523	1.07597	0.030531	1.63472	0.06742	1.81102	0.167638
172	1.14029	0.012222	1.06457	0.044119	1.08471	0.044683	1.69546	0.088557	1.8227	0.132402
174	1.14764	0.025988	1.07815	0.028512	1.07847	0.033896	1.68543	0.142308	1.87468	0.19746
176	1.14128	0.037331	1.08841	0.042119	1.08159	0.03444	1.64891	0.082891	1.82413	0.081324
178	1.14809	0.016046	1.08388	0.046786	1.06969	0.016244	1.59358	0.101038	1.75474	0.107491
180	1.14972	0.034957	1.089	0.047166	1.07338	0.022617	1.65306	0.090488	1.72879	0.116393

## Sheet: Figure 3D
Time (Minutes)	Displacer V1.0			Displacer V2.0			Displacer V2.1			Displacer V2.2			Displacer V2.3			DIsplacer V2.4			Displacer V3.0
0	29832	32762	32772	18682	19851	19874	31544	31991	30801	33644	32550	33618	34885	33726	31776	32846	31596	32053	34259	31116	30927
2	34233	34177	33733	20659	22191	21606	32074	32181	34041	36761	36003	37427	34380	35858	34952	38081	35176	34449	33930	34405	31492
4	37328	37522	36145	21085	21481	20183	36065	36358	34974	36790	40831	37920	38175	36955	37117	37984	37116	37354	36246	34679	34201
6	37396	37424	37573	21457	23642	21853	38475	36115	36917	40493	40841	41698	37756	38331	38885	41850	42520	40482	36906	37542	36450
8	38843	39750	38667	22627	23373	23728	38807	39467	35819	42212	42510	44253	41435	41394	40832	41025	42869	41944	38551	38132	36423
10	40893	43519	40948	21707	26739	25310	39021	39055	41052	46285	44848	44501	45275	45361	44857	44862	47738	42634	40249	40076	36381
12	43771	42459	42016	25310	27651	26347	42507	41582	38969	46497	49271	48900	46494	46011	46073	49314	48857	46085	42521	39057	38122
14	45235	40606	46930	24441	28108	26045	43785	44583	41072	50996	49086	48874	49598	48408	49072	52204	53036	50512	40344	38942	39039
16	44527	45271	45224	27329	27946	28275	44488	44373	43421	49130	50626	53456	53040	49160	50227	50153	49989	52356	42591	41693	40433
18	44496	44742	46216	27531	29290	29125	47320	45214	44100	53139	50928	53792	53511	51659	51103	55448	54071	51155	45155	41766	39331
20	45839	47851	47008	27682	27872	29717	48641	47951	44398	56015	54582	56613	53785	56280	51689	58116	57176	52180	44255	42067	44135
22	46932	50388	50493	27220	29762	28730	48926	48555	45773	54897	57361	58123	56131	56208	54551	57146	60290	53571	45180	43100	42929
24	48466	48939	48539	29028	31231	29339	51026	52448	47987	59403	56371	57940	54401	60071	55585	60377	61730	59743	46983	47997	45306
26	48188	47902	51900	29333	33775	32831	54087	49425	49571	61218	58750	60050	59335	55917	61093	64077	61557	59923	46624	45487	47291
28	47436	50008	51826	29004	30706	31000	52884	53505	50249	61187	61533	64294	63205	60349	59247	63158	64932	62944	48682	50661	46491
30	48354	52426	52630	29671	33731	31014	52888	55318	52346	63615	61699	64776	64111	65061	63837	66672	67003	63247	48374	47944	47096
32	49140	49985	52179	29230	33595	32249	58032	55550	50541	65846	63366	64106	63109	60301	62488	65231	67975	66792	48948	49347	44463
34	53494	54814	52849	30361	33907	32313	56028	53899	53272	66691	65828	69483	64229	63104	65270	68263	65897	66399	50544	47872	47835
36	53641	53114	52627	33110	33392	32640	57607	54951	54740	69366	67086	69557	63973	65509	64738	69335	70480	65897	54394	50573	47102
38	50908	51587	53074	29790	32738	30574	57558	59173	55319	71295	64526	67858	68953	67253	68398	73141	70306	67660	55249	50414	47742
40	51878	50467	54216	31848	32925	33678	58789	59501	55999	73686	70111	68036	69768	66950	66768	72858	74198	71018	53561	48946	50866
42	51013	54816	53486	33817	33539	33075	60781	63202	57591	70857	69466	70474	67768	71633	69898	74396	74588	68594	52661	52623	50257
44	53637	54709	53140	30786	35324	31823	61101	61792	59733	73958	74555	73555	73130	69723	70441	76821	76118	72904	56535	51435	51496
46	52760	54863	54102	31719	34229	33035	65343	62741	63270	73912	74722	71197	70782	70685	72422	81198	78000	72614	55642	51477	48782
48	53096	55117	52841	31158	33884	32496	66811	65384	59176	74858	74753	72627	73775	74043	73351	77078	77765	74383	56927	55496	52744
50	54334	54269	53441	32518	35721	32709	63449	65453	60003	77011	75460	74545	72413	74168	76462	78543	76645	76902	55309	53292	49527
52	55219	55025	55768	32630	34940	33259	66058	64969	62114	79632	75716	78278	78219	73984	72029	79137	79089	77753	57587	52612	50666
54	54296	55731	54252	33555	35484	34414	70685	67793	62094	80964	77247	77673	75026	73662	74046	84242	80168	78083	55489	54382	52965
56	53181	57523	56834	33533	34977	34866	65329	68922	64197	77410	76763	78753	76339	74141	75640	85014	84959	77258	55593	56359	50754
58	58729	55842	55328	32582	36655	34114	67541	66766	63096	82280	76979	78009	77533	76500	76190	84794	86703	81367	57832	52390	53340
60	56753	56545	57457	32889	36920	33187	71803	69701	65087	84642	82712	77127	76461	77568	80088	85229	85041	83277	58032	56798	53963
62	52189	53274	55620	33217	36230	33991	71566	72550	66908	83107	81472	80629	76041	77601	74172	87838	85743	83439	58878	56316	55246
64	53746	56085	55944	32507	35162	34834	72444	73956	67469	83390	83095	83089	76941	77355	78393	87102	87469	83332	56236	60184	52041
66	51823	56255	59395	32771	35406	33821	70668	74992	66125	84599	79947	80568	79559	78153	79574	89089	86286	83638	58266	57687	53909
68	52945	56057	57517	34848	38341	34218	72709	73353	69768	88627	80068	84232	81259	78582	77170	91615	87062	86079	59379	55812	57120
70	53974	52404	57301	32181	37045	35411	73845	74520	71965	82379	83713	84798	83148	80741	81595	90719	88537	87546	60354	57520	54542
72	55316	56833	54863	31615	34633	34122	74630	74004	69315	86626	85314	86917	83928	80827	80408	90569	86461	84927	60292	58679	55831
74	55370	55298	55952	32531	35040	34164	74475	75577	72128	87333	81109	83440	80777	80290	79127	90785	93377	87303	60387	57308	56717
76	58473	54801	52518	34233	35551	34364	77195	75182	71811	88221	88730	84234	84233	80874	80129	93225	91704	85110	57332	58504	56043
78	53483	55735	56064	34917	36615	33973	77948	74979	73244	90906	87317	86766	84795	80523	79854	94973	92367	88467	62308	58175	58179
80	56159	55523	54814	30761	36871	32148	77800	77260	72673	91376	90458	85959	84942	81383	80162	93186	91414	88171	60847	61126	56113
82	55855	58938	56582	34533	35013	35231	79104	81696	72284	90451	89059	90270	86731	85004	80278	95219	96449	94258	61508	60437	54934
84	56381	55689	56507	33307	35363	32887	76781	78652	75479	91629	89015	89104	82315	84244	82100	91556	95170	95204	63127	58349	59853
86	51750	55667	54609	34940	36777	34638	76669	82944	75681	93035	88321	86351	84990	80495	84143	94889	96923	92764	59673	57331	56854
88	54596	55016	54964	35275	37760	35184	82174	82303	77530	92419	90451	90389	86035	84330	82408	98146	96968	90114	60223	61062	57076
90	54863	59988	56040	34794	37057	36252	81088	83585	73794	94385	95061	90160	89813	86758	81838	95820	96838	90052	59487	58654	54445
92	55773	57407	56726	35132	34495	33974	82395	85706	79370	93361	91591	93013	84110	87717	82792	96225	96657	94306	60523	58230	56002
94	56259	57506	57474	34018	37225	35876	85767	84135	81721	97026	93789	93543	83301	86973	83106	99650	101179	96500	61355	61535	58903
96	57395	59856	56331	33764	37473	34964	85745	84850	75302	93820	96279	96042	87916	85492	83864	99845	100268	95195	59874	59640	57755
98	54250	54310	56402	36375	37238	35472	84175	87899	80570	98777	95300	93042	85840	90973	88152	101283	97832	92635	61852	61491	60366
100	54854	57672	56608	33899	36977	37105	85631	84414	83295	97546	96037	97103	85168	89958	84934	100623	100264	95392	61040	62033	57392
102	54074	58681	56086	34343	38378	35441	85201	87823	80958	100076	92319	96275	86150	87028	87456	97178	100204	95687	63356	59795	57807
104	55784	56148	57363	33599	37998	37060	85611	84996	81889	96966	92605	95902	85299	88950	84597	100958	102299	100437	62413	60797	59221
106	57692	56523	55856	35676	35287	36395	86399	91586	83642	100829	94453	99617	88138	87598	88715	103286	102036	100749	62941	61379	61304
108	53906	57844	54804	34020	36674	36698	88360	90292	86012	99865	96869	98096	89241	90163	86129	101566	102364	94450	63477	61396	59655
110	55992	57169	58728	33140	36511	36140	90232	93399	84334	97659	98273	100467	88204	90487	89196	102267	104950	101227	61349	62754	58189
112	57327	58090	56953	34639	36020	34701	90048	91026	82457	102018	99942	99700	93164	92339	89335	108794	103177	102571	65315	61897	61498
114	54550	56892	55972	34323	38378	36034	89574	91360	85813	102873	98617	102068	87940	87411	87210	105393	101780	100080	61648	60807	60477
116	53567	57099	56501	35360	37460	36234	88770	94557	83867	102915	99889	101352	89608	91672	91268	101518	107203	98349	63328	62396	58803
118	55178	59872	56295	31809	36319	38031	89599	91395	85433	103902	99426	101889	89382	90801	87773	105008	106314	101003	63568	62625	58756
120	55497	58841	56066	34627	38657	35745	94639	95005	83816	104825	102431	104025	91296	90898	89957	103959	107185	102834	63685	62452	61490
122	55344	59428	55985	34210	37400	34826	93210	93071	84440	103725	103997	102630	90615	93291	90066	109120	110720	100645	61743	63210	59541
124	55229	58977	57938	35377	38691	36301	93702	95217	87800	104525	101976	103798	93918	92323	84522	110353	107106	98915	61792	62936	60932
126	53998	57125	57836	33672	38643	34676	95188	96841	88462	105750	101922	106204	93688	92587	91285	109233	108402	104433	67901	62439	60149
128	53855	56650	58601	36071	38463	36594	95514	98403	89802	109888	107452	101624	93024	91908	92199	108797	110608	102153	60095	63244	58620
130	56912	57039	55494	36663	36733	35545	96042	100102	89799	108424	105675	106691	98168	91194	93650	111943	106516	103073	66000	67048	56095
132	55148	56684	56280	34716	36775	35713	95393	99469	86749	108983	106568	103631	94510	95327	93499	110920	111636	104276	62606	64827	61295
134	55206	55278	55622	34299	37233	36009	94969	95348	89495	110289	107032	107975	96153	93841	90019	109347	110254	105096	65645	64843	61214
136	57330	58718	59467	37029	40049	38687	94891	101479	91370	113555	106545	107657	94494	96188	94828	115935	112420	108837	65641	64088	60168
138	56064	58414	59913	33799	39072	37650	102135	98444	92695	110837	105987	107068	98128	92269	92286	113038	114660	103115	63124	63594	63763
140	55940	55581	57919	34470	37226	35550	97529	95776	92771	112689	108617	106375	95600	95517	93735	115255	114056	106689	65234	63873	63496
142	55741	59463	54747	36455	35757	34979	98447	102379	97443	115857	110098	107665	93512	95179	95156	113255	116301	108258	64809	65180	64111
144	53321	57042	58219	35377	36729	37388	96895	101338	95113	113610	110582	109328	95548	95545	93451	115496	115987	107191	66031	65062	60107
146	54772	57189	58646	34309	36744	36420	99358	108166	93798	114955	112043	109708	95864	96426	93006	113162	116964	109096	66478	65013	61673
148	56148	58232	55492	36208	37649	35814	97614	104762	95871	115144	111013	109389	96754	96593	96000	115857	118787	107713	67879	61291	63885
150	55992	57307	58503	34422	37938	38843	102667	103181	98800	119404	110380	114046	95364	97964	92455	119391	116530	111204	64928	65306	62409
152	55424	57713	56160	35708	39718	35122	102077	102736	96029	115627	113171	111687	97809	95180	96138	116714	113761	108174	65338	64251	60762
154	53940	60881	58528	34203	39345	36236	103528	104418	98946	114455	110823	112379	98943	98042	92668	118100	116003	111935	66762	64538	62780
156	55228	58042	58536	34158	39107	35271	101599	107081	95678	114446	113519	112011	100428	96925	97029	120409	119623	114858	66833	63825	61352
158	57588	56149	53951	36662	38210	36682	105435	107562	99613	115731	116034	112401	100992	100436	97103	115886	115974	111896	68051	65228	60811
160	59239	57087	55179	34361	36989	36694	105565	107871	97457	122224	114295	120995	97168	101116	99102	119974	120831	114852	64165	65719	62172
162	53490	55555	58399	34628	37012	34697	107785	109018	99114	118125	117978	117450	103092	95355	96016	122945	117134	111779	64560	66868	61506
164	54893	60314	57681	35618	36829	36068	107291	111637	99413	119286	114840	117968	102550	98257	95362	120798	119176	113735	69106	67543	63384
166	55504	56074	57351	34951	38145	37277	105636	109896	102640	120789	116913	115495	98853	101087	96204	121334	117636	115256	67319	66675	61502
168	56265	59815	57834	34371	36179	37080	102881	108928	101326	119386	112965	116053	101801	97176	94885	121325	122341	115760	67434	65319	60322
170	52213	56555	56998	35858	36851	37280	103320	111441	102243	123130	121400	123243	100933	97077	100033	124199	119337	111839	67812	68309	65685
172	55558	55314	55712	36082	38726	37269	104293	111718	103468	124173	121044	118292	102378	101470	97359	120274	124121	115887	68766	66527	63743
174	53103	58228	58659	35242	37929	38885	110892	111404	104114	123920	120691	120365	100288	100003	99603	124626	119727	114252	69644	65062	61552
176	53069	58311	56404	35958	36391	38504	109348	108101	105720	122740	119000	116980	100283	100408	95133	124750	122551	115136	65877	69839	63155
178	54376	58259	55052	34749	38201	36014	108711	114747	104435	123481	122262	114850	100067	102588	97848	126306	122229	118227	66865	63014	61108
180	55166	58273	57728	35820	38177	36920	106248	114255	106969	121957	116682	119177	100447	101856	99007	120408	123884	122411	66454	68109	64019
182	55599	57745	57381	35280	36510	37811	110218	113064	103079	124710	120142	122339	102774	100878	95287	122166	130029	114470	69542	68201	64084
184	58175	57485	59554	36167	36035	36781	110693	117046	101413	124196	119111	122558	101174	99709	98084	123965	123221	121913	71336	64730	64516
186	55789	56944	54639	35982	37549	35960	109472	117064	104986	123503	121744	126559	101514	99031	100684	126509	129160	117012	66291	65594	63651
188	55353	56842	56733	35821	36191	37690	111987	114091	107495	128627	123927	121412	102569	101221	97318	125338	122880	117238	71902	68073	64036
190	54005	58450	58948	35696	38821	36209	114301	115890	104520	125588	123124	124672	98638	106031	97489	126632	124451	116694	67156	67421	61387
192	57404	59947	58794	35778	38113	37921	109612	112548	105744	127875	124399	126810	105590	100169	99125	123811	123885	118459	68700	67075	65183
194	55699	57042	57753	35530	38444	38537	114626	117590	108841	127674	126875	121548	99258	102209	101593	129747	122850	122270	66508	62646	64572
196	54308	56835	56469	37778	36565	35063	113802	118549	106107	129147	125701	127282	101527	103206	96797	128592	128139	118668	68570	67751	63501
198	55006	57961	58731	34837	38270	38484	112205	121133	110838	128009	125283	124554	102329	101658	100268	126950	125206	121671	71219	69649	65710
200	58528	59650	54989	34840	37648	36557	116500	119821	113359	130316	123098	125243	102288	101935	101778	125543	128433	119752	70395	69152	67083
202	55384	58854	56092	35311	39185	36243	116263	117748	109216	129498	127639	125330	102190	107309	100715	127965	126533	119946	68871	67585	63854
204	57012	59574	55989	35566	38035	37383	116143	123076	107659	131373	126730	124009	104879	102677	104293	131032	128644	118751	69317	68829	65711
206	56112	57574	55228	36409	35798	37701	113929	124624	113292	130311	128572	126245	104250	106142	105772	133828	129026	126133	69654	70767	65599
208	51648	60529	58561	36006	38389	38031	114467	116498	110223	129805	126734	125274	105462	103841	101207	130152	129018	122088	71854	66593	64729
210	54033	56323	58923	36926	38511	36964	120608	123296	113047	132378	131642	128303	109234	105786	102908	125858	132769	125144	71641	69458	61889
212	56991	55870	58162	35870	38176	38411	123382	121915	112382	135763	133960	132021	104359	101309	104184	133123	131053	121822	72343	71446	64422
214	53797	56200	57203	37351	38367	37314	122205	124042	114628	132753	127834	126561	105688	106694	105227	129950	131756	125646	70568	69243	65293
216	56480	59798	58197	35011	38310	40021	116851	125581	115007	137401	131879	126325	102713	105684	100524	129292	129629	124273	70540	70846	65157
218	55126	60305	57605	35812	37498	37338	121868	127764	114883	138701	131882	126781	105664	105482	101772	129267	132323	122563	71564	69605	65597
220	55773	59938	58357	36674	36661	36528	121908	126574	112403	129974	130149	132852	107417	105757	100197	133513	133242	125370	72229	66970	63152
222	54599	58638	57053	36687	37548	37322	120485	119850	110171	135449	135470	134952	104134	106452	103720	132739	132694	121479	70806	69905	64212
224	55154	55801	58665	36766	36842	38970	121856	125742	116411	133366	132588	133137	106626	108642	103208	130208	134062	127714	71734	70391	65166
226	56111	56672	57905	36806	37428	38567	116387	125767	113956	134645	132307	134704	105643	102955	102711	133120	137864	128311	70902	67761	65743
228	56006	58756	57696	36534	37670	35821	120202	124587	114250	136604	133315	130648	106143	106921	105299	132448	132497	124682	68870	70448	64247
230	58307	55845	56206	35109	38414	36509	123645	126860	115034	138937	133553	133741	107056	108847	102717	131131	135061	126618	70370	68375	62846
232	54848	58034	57275	35703	35643	37240	118458	130749	114748	142438	134861	135287	106315	103971	102852	138199	135526	128297	70509	67887	67588
234	55413	57999	58333	33723	38503	37801	120881	130132	115775	137681	138284	135126	108179	106442	105572	134676	136162	128911	72148	67416	63741
236	59245	60336	56494	33992	37319	35201	123856	124430	121075	137680	138475	135099	108908	104440	102576	132164	135567	130270	72977	71087	66398
238	55662	57473	58684	34040	39414	37432	122322	129900	118394	137122	134860	135308	111204	108377	106209	139690	138407	132336	70993	71602	66182
240	56249	58162	57197	37387	37806	37291	124262	126555	117771	140991	139066	141296	110286	106161	101223	131812	135909	129186	73488	68692	66020
242	56717	59569	60295	36589	37739	38815	125810	129665	116951	144717	134231	137537	109871	107920	105987	133626	136283	128475	72651	66880	68262
244	55730	57400	57853	35303	36927	38712	128570	126926	121392	145586	139109	133168	106293	107519	108612	140180	135976	129113	72606	70601	65308
246	55747	59803	58622	35866	35985	37237	127545	132033	117548	142788	139584	136206	112926	109172	106905	135611	136344	124616	70088	70673	64317
248	55673	57552	58914	34970	35571	38406	126538	131612	120862	141919	136515	132106	111367	107400	105250	135110	137387	127986	70695	69238	64440
250	56835	56703	56660	36308	35516	36279	123741	135413	122366	142724	136341	139761	112903	110548	104690	138784	137898	128688	70851	70973	66062
252	57459	60167	58108	36995	38514	37620	122307	128830	123370	143700	140220	136384	111502	109424	106771	135984	138304	125733	70663	69065	66242
254	55526	58151	58037	37164	38076	38539	122450	131055	127141	139487	139889	140032	107715	107871	105790	142304	136492	130289	72979	70015	66922
256	55442	56878	56750	36520	37546	37371	124283	133604	117025	147580	138633	139254	107344	110418	105987	135776	136913	129004	65865	73223	65912
258	56255	57164	56849	35034	37764	38249	126982	137275	119444	147895	143773	141205	112414	108151	109005	142288	140011	130891	75218	68674	67621
260	58335	57635	58274	34646	38368	38546	131118	131663	121213	145825	140559	144542	111793	110063	108691	137943	139630	131602	69208	71345	67582
262	56468	60201	56206	34853	38804	37129	129182	133196	124087	151039	142121	143777	110761	108805	109689	142808	145727	132642	76204	70801	64624
264	58936	59127	59247	39197	38198	37908	125727	134153	124526	149653	143781	135408	112764	111114	105760	144184	141107	133453	71623	71919	65725
266	59151	58699	59480	36093	39823	36482	129314	134731	121358	145902	142885	140662	109073	109313	107407	139087	142484	131590	72300	72645	66245
268	54001	57142	57691	35186	37755	36894	125872	135580	125503	151685	146757	140198	110607	111138	106543	140999	145272	130693	70998	68400	66793
270	56990	60573	57413	37371	37070	38445	130505	138056	122783	149963	147561	144960	116600	109878	111512	141126	139826	131789	72981	70967	67801
272	56385	59034	56253	35869	37679	37485	128810	138395	123242	147041	144663	138786	111671	110766	107115	143091	146307	133426	72535	69890	67584
274	55550	59333	58472	36379	38455	38096	128397	136090	127329	151593	144332	147436	113841	115752	108104	147621	142024	134424	74493	74284	66970
276	56156	58805	57883	36151	37789	38005	129950	137638	125316	146179	147716	144849	113306	111030	106129	142050	147270	134491	73974	72036	67874
278	57205	59542	55327	35693	36767	39166	129175	137482	127630	151632	148364	145488	120757	110579	105967	145403	144344	137555	71846	70738	68404
280	54812	60269	57077	37625	38404	39098	132358	136801	126271	154330	143856	145409	108651	113768	109784	144026	144742	138413	74307	70528	67676
282	58739	58700	56978	35295	36338	38314	135351	138241	122864	154930	151192	149859	115916	110859	107084	143788	144378	141324	75446	71922	68844
284	57683	55297	56380	34895	37367	38568	132799	137312	126835	154587	152283	147901	114442	111317	108525	147308	151849	134819	74836	73946	70066
286	56713	60675	59535	36786	37884	36158	130379	132457	126224	155500	151461	152003	114265	113422	109756	152391	144998	136541	76371	72925	69153
288	56783	60785	57241	35136	38972	38001	131091	135129	128433	155342	147370	146366	115101	112380	109437	144045	142842	133868	72754	76193	68939
290	55875	60372	56877	38066	38847	37334	130035	142075	124826	157232	152160	149635	114522	112586	111799	144417	147677	138283	75911	74873	65983
292	54068	59539	58331	35049	35880	38120	131672	142267	125911	157016	151935	147558	114491	116841	106980	149862	150987	137330	71729	74468	66593
294	54689	59195	56292	35078	37501	36273	133104	138170	124989	158644	153231	145739	113248	114415	116220	144512	148522	137432	74327	73371	67543
296	56186	59875	59654	35576	37904	38623	131996	138948	128471	159312	150828	152478	112512	113460	111794	146927	149401	136601	73763	73672	69502
298	52649	60410	60219	35944	36453	38921	134543	142315	127570	155207	145695	153168	115184	111663	114576	149534	150019	138749	73329	72029	70399
300	57122	59234	56375	37621	38097	38818	137278	139436	125579	157419	156963	152651	114086	109942	111582	154009	149127	136729	74236	75183	66455

## Sheet: Figure 3E
Time (Minutes)	Displacer V1.0			Displacer V2.0			Displacer V2.1			Displacer V2.2			Displacer V3.0			Displacer V3.1			Displacer V3.2
0	0.873328	0.968345	0.984824	1.02665	1.0781	1.01083	1.09996	1.06239	1.08636	1.11216	1.26523	1.21495	1.07166	1.14447	1.09817	0.9536	1.04192	0.936838	1.07479	1.08238	0.949908
2	0.985491	0.997898	0.97012	1.11882	1.19499	1.09044	1.19465	1.26234	1.18729	1.16604	1.19629	1.16522	1.1854	1.19302	1.12584	1.05937	0.983081	0.963237	1.10686	1.15597	1.0175
4	1.05769	1.08492	1.08789	1.10456	1.14945	0.947247	1.16004	1.17063	1.23006	1.21657	1.44784	1.28583	1.0985	1.13398	1.21706	1.04265	1.03434	0.978178	1.01082	0.940007	0.986819
6	1.12071	1.1551	1.13596	1.08522	1.17904	1.12755	1.24495	1.21809	1.28932	1.3353	1.26654	1.21937	1.29972	1.07128	1.12843	1.05454	1.10655	1.02604	1.06023	1.07764	1.11546
8	1.1451	1.17628	1.10626	1.27887	1.19677	1.13444	1.20535	1.21431	1.26258	1.27733	1.3502	1.23375	1.15036	1.11842	1.13537	1.04393	1.03187	1.03667	1.08226	1.11383	1.00413
10	1.16332	1.31105	1.253	1.10812	1.26408	1.27551	1.24035	1.39704	1.37131	1.34194	1.33267	1.28353	1.21099	1.15624	1.16149	1.12546	1.18963	1.02843	1.08593	1.05784	1.09339
12	1.25339	1.32016	1.1915	1.24594	1.40339	1.31551	1.42875	1.27269	1.38978	1.37621	1.52047	1.38755	1.19741	1.3091	1.13688	1.1227	1.01129	0.979692	1.26921	0.962311	1.17703
14	1.37559	1.23378	1.3625	1.1331	1.36182	1.21922	1.34224	1.43474	1.40942	1.30188	1.5504	1.62875	1.21476	1.29099	1.06121	1.07988	1.16561	1.03626	1.19663	1.18075	1.07675
16	1.3833	1.44798	1.33086	1.40806	1.28505	1.42178	1.33729	1.41659	1.44488	1.47625	1.47413	1.38084	1.13147	1.27303	1.28989	1.10161	1.03237	1.11687	1.17519	1.22913	1.23979
18	1.33762	1.3472	1.38979	1.42448	1.51589	1.48536	1.38133	1.48575	1.48301	1.52784	1.61364	1.42446	1.33007	1.34213	1.16029	1.15634	1.04309	1.02066	1.16668	1.16171	1.27826
20	1.29889	1.35371	1.33747	1.36036	1.47276	1.53346	1.43708	1.3603	1.43131	1.53484	1.68748	1.56557	1.2524	1.32426	1.0753	1.21787	1.15583	1.04666	1.20056	1.19947	1.19705
22	1.41132	1.40153	1.4736	1.43007	1.71896	1.53472	1.43997	1.40855	1.56105	1.58573	1.62256	1.5102	1.23757	1.26151	1.13957	1.13615	1.04489	1.03876	1.23327	1.12123	1.19311
24	1.41066	1.4243	1.36063	1.57692	1.56303	1.42978	1.55582	1.60971	1.66073	1.52125	1.52703	1.58533	1.34378	1.20743	1.13538	1.13115	1.10176	1.03794	1.2565	1.2343	1.21299
26	1.40281	1.49488	1.48681	1.46314	1.70246	1.49117	1.58499	1.6465	1.70503	1.66875	1.59785	1.59597	1.31311	1.24517	1.16892	1.16631	1.09142	1.11638	1.23563	1.28233	1.18258
28	1.45487	1.48776	1.39067	1.46537	1.49341	1.42634	1.50381	1.61624	1.57885	1.64635	1.63083	1.61905	1.16606	1.25981	1.12238	1.09514	1.20418	1.09444	1.30641	1.29102	1.40352
30	1.3853	1.48339	1.49564	1.48936	1.72511	1.49458	1.75074	1.65617	1.69757	1.63701	1.82092	1.66921	1.28917	1.2346	1.12453	1.08304	1.1265	1.10319	1.38684	1.24495	1.28839
32	1.49339	1.44603	1.48232	1.44861	1.7717	1.62594	1.68901	1.47446	1.58552	1.72419	1.71955	1.64939	1.21146	1.26593	1.0832	1.16177	1.10096	1.03458	1.29266	1.38738	1.422
34	1.54509	1.53377	1.50842	1.43775	1.70696	1.65411	1.59059	1.6249	1.82328	1.64708	1.65668	1.70145	1.23145	1.33742	1.11767	1.11984	1.12228	1.09823	1.31951	1.35585	1.27933
36	1.61657	1.56605	1.48769	1.63765	1.79556	1.61608	1.88835	1.71588	1.87897	1.61324	1.70264	1.62986	1.17245	1.23529	1.04454	1.10265	1.16708	1.01662	1.50478	1.37207	1.40332
38	1.46755	1.56339	1.55706	1.48645	1.55186	1.46259	1.71086	1.97019	1.75143	1.61724	1.82879	1.60819	1.22946	1.19747	1.10767	1.10176	1.11002	1.03023	1.40909	1.3012	1.42945
40	1.45905	1.46928	1.51959	1.64453	1.70702	1.74805	1.64993	1.75259	1.90187	1.75298	1.74427	1.72483	1.31945	1.22155	1.10481	1.08276	1.05005	1.0525	1.37371	1.26059	1.40143
42	1.54575	1.57368	1.46505	1.74738	1.5842	1.55742	1.8839	1.79289	1.96118	1.62908	1.84029	1.68465	1.18328	1.33548	1.0957	1.18797	1.04998	1.00612	1.42666	1.31179	1.51354
44	1.57863	1.64281	1.44914	1.61785	1.75175	1.56957	1.88155	1.87259	2.09821	1.67498	1.77137	1.67221	1.23326	1.26077	1.07649	1.05356	1.07265	1.00984	1.4436	1.34579	1.44171
46	1.50318	1.60245	1.50308	1.59056	1.71419	1.61619	2.0618	1.80238	2.17265	1.73536	1.77232	1.68557	1.26554	1.32886	1.10372	1.16156	1.11214	1.04708	1.4451	1.38608	1.37874
48	1.55447	1.59514	1.50274	1.56016	1.62826	1.55714	2.0144	2.01467	2.0558	1.76365	1.73535	1.65336	1.30149	1.25066	1.15758	1.16708	1.10053	1.06248	1.42671	1.51448	1.54152
50	1.56614	1.59441	1.55077	1.59966	1.83467	1.49684	2.14003	2.1035	1.9867	1.71043	1.81835	1.63974	1.19296	1.28463	1.14376	1.11032	1.07329	1.09732	1.54616	1.32798	1.4135
52	1.66739	1.53778	1.60576	1.76674	1.68972	1.68913	1.91451	1.99381	2.17965	1.71202	1.79471	1.72527	1.2659	1.22719	1.16694	1.11218	0.981525	1.05534	1.39982	1.43079	1.43158
54	1.3742	1.63592	1.50278	1.6229	1.74351	1.6397	2.01868	2.04752	2.08398	1.86525	1.89248	1.76579	1.16764	1.23026	1.16281	1.25598	1.12298	1.05842	1.43277	1.46356	1.63533
56	1.45081	1.69469	1.62504	1.66293	1.76313	1.56941	1.86296	2.26536	2.17526	1.82004	1.74994	1.7524	1.27545	1.23955	1.10473	1.12969	1.08313	1.07677	1.50034	1.51909	1.546
58	1.65789	1.62247	1.499	1.50425	1.73457	1.70749	2.19662	1.88581	2.23568	1.75767	1.6967	1.75509	1.20648	1.21796	1.16963	1.05724	1.03544	1.05451	1.37181	1.43135	1.41607
60	1.60919	1.59138	1.58467	1.58394	1.72863	1.58056	2.14295	2.0053	2.21319	1.77143	1.95085	1.80225	1.22619	1.31366	1.13782	1.0772	1.08345	1.02251	1.53851	1.33162	1.40729
62	1.43676	1.42223	1.55554	1.61436	1.83601	1.62862	1.95809	2.23034	2.22763	1.84916	1.93609	1.80698	1.18531	1.23718	1.09488	1.05593	1.02926	1.01662	1.44132	1.476	1.57672
64	1.51752	1.66119	1.53993	1.52572	1.71698	1.70038	2.09494	2.24993	2.37599	1.77706	1.85024	1.83164	1.31542	1.23174	1.11923	1.05719	1.0974	0.971872	1.6366	1.51133	1.57578
66	1.39115	1.59209	1.6129	1.54755	1.62212	1.55078	2.24108	2.1876	2.44294	1.80906	1.85621	1.79371	1.18538	1.34347	1.12797	1.12676	1.11853	1.03855	1.62976	1.46382	1.58514
68	1.46237	1.55718	1.58918	1.74537	1.97879	1.60444	2.13727	2.30858	2.20554	1.90863	1.76919	1.83379	1.18419	1.32967	1.11791	1.14931	1.09191	1.06047	1.58184	1.49732	1.63671
70	1.49517	1.52342	1.53828	1.45761	1.906	1.65264	2.39534	2.17132	2.4446	1.83386	1.85242	1.77596	1.19229	1.35022	1.10203	1.0551	1.06361	1.02649	1.49056	1.38103	1.66761
72	1.51517	1.57948	1.56448	1.66342	1.80221	1.68629	2.48735	2.43073	2.31008	1.87199	1.91166	1.93207	1.24521	1.39812	1.09028	1.08786	1.05834	1.0757	1.65702	1.45467	1.66061
74	1.56443	1.48248	1.55773	1.62533	1.69554	1.68803	2.46441	2.51174	2.20865	1.75799	1.98735	1.79301	1.29049	1.35742	1.14857	1.11731	1.09622	1.04415	1.67219	1.52124	1.58531
76	1.61305	1.50817	1.46514	1.66803	1.72293	1.58615	2.41308	2.20032	2.63795	1.98706	1.90439	1.8587	1.27639	1.2505	1.12895	1.09095	0.997745	1.03821	1.53719	1.69361	1.61465
78	1.44803	1.67061	1.59363	1.69245	1.80378	1.62356	2.32336	2.25134	2.55135	1.835	1.91624	1.88495	1.26803	1.27687	1.11317	1.12286	1.04127	1.04914	1.60922	1.58368	1.72834
80	1.55889	1.61884	1.50085	1.50509	1.61298	1.50838	2.31621	2.38787	2.5031	1.88715	1.9318	1.87293	1.23691	1.25662	1.18111	1.06205	1.04649	1.06109	1.70681	1.61906	1.59479
82	1.63923	1.62633	1.47618	1.6806	1.73641	1.62602	2.387	2.55868	2.63281	1.85256	1.85346	1.78137	1.22417	1.34985	1.11142	1.08869	1.10012	1.09512	1.64665	1.66287	1.76736
84	1.65413	1.5903	1.51558	1.57793	1.7633	1.57399	2.30691	2.61663	2.85136	2.00546	1.79769	1.7207	1.28178	1.21976	1.15084	1.04464	1.04797	1.03387	1.57106	1.72894	1.67465
86	1.41835	1.54121	1.57747	1.6654	1.80589	1.63095	2.18184	2.56243	2.77103	1.93532	1.89591	1.82764	1.28935	1.35046	1.07439	1.16431	1.08339	1.08258	1.71584	1.5992	1.7201
88	1.43304	1.54383	1.53364	1.67299	1.949	1.62685	2.59212	2.64554	2.57065	1.84589	1.92124	1.90541	1.22626	1.32361	1.11234	1.11374	1.03612	1.01574	1.69731	1.65766	1.71947
90	1.48999	1.71257	1.5533	1.66303	1.73732	1.75274	2.5216	2.50229	2.60377	1.87986	1.95682	2.03476	1.30139	1.22867	1.16502	1.07121	1.04563	1.03316	1.93227	1.61845	1.69247
92	1.48879	1.55427	1.63311	1.72157	1.69201	1.62906	2.28691	2.59577	2.72846	1.99071	1.89092	1.82976	1.29437	1.31743	1.09258	1.12141	1.0934	1.0172	1.62053	1.7097	1.80592
94	1.53886	1.68048	1.57003	1.53566	1.7452	1.76991	2.56784	2.46787	2.56979	2.01113	1.90564	1.81491	1.24161	1.30146	1.14516	1.11781	1.07089	1.00063	1.5939	1.60001	1.9149
96	1.5862	1.72252	1.57437	1.50323	1.86072	1.5625	2.85499	2.64572	2.62087	1.87186	1.94772	1.82129	1.16603	1.26692	1.16638	1.13994	1.06343	1.0013	1.7353	1.74535	1.71134
98	1.47671	1.4478	1.54302	1.63601	1.77214	1.79423	2.53605	2.54302	2.97716	1.91654	1.9773	1.8494	1.26235	1.29843	1.19689	1.09981	1.06134	1.05484	1.68601	1.63172	1.68155
100	1.49813	1.59372	1.52049	1.55965	1.63297	1.7504	2.54379	2.53923	2.74339	1.97169	1.92156	1.96663	1.19302	1.26533	1.16296	1.08652	1.05112	1.01021	1.73893	1.636	1.72879
102	1.50771	1.5949	1.55092	1.62156	1.83988	1.4992	2.58397	2.62319	2.82346	1.95312	1.90069	1.77148	1.25713	1.18431	1.20455	1.0828	1.06524	0.996308	1.63934	1.65873	1.73803
104	1.51513	1.48922	1.61723	1.49355	1.91435	1.77771	2.4225	2.72583	2.85595	1.90525	1.92636	1.87612	1.33288	1.23748	1.17851	1.09062	1.07409	0.992415	1.75006	1.72111	1.78377
106	1.57045	1.55279	1.43707	1.64679	1.65713	1.64967	2.4991	2.68488	2.65844	1.92215	1.90326	1.88904	1.26618	1.30998	1.13844	1.08509	1.09335	1.04961	1.70443	1.66655	1.74414
108	1.50349	1.66832	1.52119	1.55912	1.72836	1.6233	2.4689	2.86974	2.72596	2.06145	2.01669	1.9403	1.25543	1.29069	1.11694	1.04841	1.08948	1.01106	1.75176	1.68985	1.76255
110	1.54914	1.62907	1.52453	1.50938	1.77049	1.65765	2.7607	2.56272	3.1105	1.91141	2.05793	1.91412	1.26485	1.272	1.21425	1.07331	1.09575	1.06071	1.93039	1.66141	1.814
112	1.61512	1.5371	1.50973	1.72222	1.72799	1.62641	2.83278	2.80622	2.96122	1.86472	2.00019	1.95628	1.31184	1.32649	1.1504	1.12297	1.08827	1.01897	1.82007	1.67177	1.66968
114	1.50263	1.56138	1.53017	1.51496	1.80246	1.68999	2.81551	2.70903	2.84826	1.94103	1.96626	1.90546	1.3138	1.32625	1.14516	1.08596	1.0656	1.04083	1.86118	1.60076	1.86098
116	1.51757	1.55384	1.56067	1.65986	1.73732	1.73443	2.88706	2.80711	2.81732	1.94225	2.03969	1.92426	1.26689	1.22935	1.17338	1.06351	1.09068	1.0292	1.76551	1.64467	1.67607
118	1.42307	1.66394	1.55134	1.42138	1.87627	1.72492	2.58763	2.57912	2.92121	1.83391	1.93858	1.98715	1.38262	1.2581	1.11866	1.07787	1.00513	1.04178	1.93976	1.81811	1.77285
120	1.50521	1.65098	1.53563	1.53727	1.85414	1.61311	2.72956	2.56973	2.8538	1.96919	2.0299	2.0344	1.29934	1.27576	1.16356	1.07981	1.02523	1.04302	1.81496	1.81902	1.77498
122	1.52652	1.70164	1.59724	1.49304	1.75653	1.6606	3.02971	2.65616	3.00088	2.10412	2.18382	1.91832	1.34339	1.32043	1.16123	1.08128	1.04962	1.02387	1.65258	1.63394	1.74033
124	1.4547	1.62623	1.561	1.48868	1.74409	1.80172	2.61796	2.58402	2.97693	1.95182	2.05831	1.99293	1.22537	1.3353	1.14011	1.05305	0.999907	1.00128	1.85264	1.75272	1.90067
126	1.48033	1.53934	1.56631	1.46451	1.9738	1.62661	3.08122	2.99525	3.22365	2.0321	2.05619	1.88162	1.2444	1.26593	1.14534	1.08616	1.01346	1.02915	1.80414	1.80557	1.85383
128	1.57549	1.63459	1.57814	1.50906	1.93534	1.71609	3.09284	2.77175	3.06334	1.97739	2.04561	1.94198	1.25443	1.3582	1.12906	1.07298	1.05223	0.98893	1.78063	1.75312	1.88541
130	1.59489	1.54039	1.42882	1.7352	1.72845	1.59559	2.79155	2.80271	2.92164	1.98069	2.00611	2.05375	1.21111	1.37383	1.133	1.04305	1.0578	1.04545	1.7497	1.77005	1.83415
132	1.41547	1.59624	1.45175	1.60968	1.70263	1.53288	2.91904	2.92921	3.14597	2.11424	2.15238	1.91313	1.21304	1.28797	1.16671	1.06138	1.05343	0.990817	1.80553	1.70231	1.72385
134	1.43672	1.49094	1.43644	1.46152	1.56054	1.59522	2.82639	3.12514	2.89781	1.9023	1.99005	1.98233	1.23761	1.37888	1.13828	1.04472	1.06082	0.963549	1.99897	1.73773	1.86712
136	1.59916	1.62622	1.59356	1.64332	1.9234	1.89123	2.85663	2.94793	3.18309	2.08551	2.1448	1.96802	1.25368	1.35135	1.10155	1.05051	1.00975	1.01515	1.87054	1.78729	1.91803
138	1.55876	1.58175	1.58659	1.43016	1.87423	1.6787	2.88781	3.15187	2.86999	2.10087	1.93616	2.04739	1.33329	1.28067	1.12402	1.06284	1.07239	1.02186	1.8831	1.80149	1.87114
140	1.47911	1.56743	1.50819	1.51537	1.80876	1.66425	3.03696	3.17443	3.25019	2.01407	1.97277	1.94049	1.23841	1.26162	1.1329	1.09793	1.05143	1.01306	1.84879	1.71456	1.95545
142	1.52352	1.71447	1.48551	1.55154	1.59987	1.57442	2.97861	3.26537	3.09956	2.0689	2.11078	2.01673	1.33929	1.34355	1.25716	1.01762	1.02171	1.0146	1.87115	1.73388	1.89471
144	1.42208	1.54669	1.47472	1.47159	1.82841	1.71931	3.17756	3.2414	2.85121	1.91776	2.06532	1.98593	1.2732	1.24728	1.12229	1.03653	0.989642	1.03305	1.85279	1.73519	1.88435
146	1.45767	1.56387	1.62946	1.49403	1.71325	1.62705	2.87662	3.15204	3.14099	1.93786	2.06963	1.88997	1.22711	1.26337	1.22638	1.09372	1.04612	0.984627	1.85741	1.89491	1.93942
148	1.46819	1.5274	1.46093	1.57248	1.74003	1.68958	2.99501	3.11617	3.22959	2.04893	2.05744	2.05088	1.24417	1.31942	1.12451	1.1239	0.990606	1.02625	1.96807	1.74645	1.87038
150	1.50528	1.60546	1.50719	1.46708	1.82053	1.63364	3.06585	3.34555	3.40305	2.06679	2.03217	1.95524	1.30238	1.24028	1.16459	1.04939	1.07391	1.0522	1.81377	1.79649	1.73453
152	1.51155	1.64993	1.52212	1.50103	1.87358	1.59616	3.04155	3.0189	3.29106	2.00839	1.96825	1.89754	1.29145	1.31672	1.14486	1.0359	1.04714	1.01567	1.88279	1.83251	1.95262
154	1.43202	1.66065	1.56542	1.46361	1.87037	1.58665	3.0861	3.29941	3.16929	1.97315	2.07253	1.93683	1.22798	1.27312	1.15844	1.07217	1.07354	1.00389	1.98253	1.94285	1.92113
156	1.42428	1.52469	1.58248	1.43479	1.72422	1.70317	3.07068	3.19522	3.36436	2.06652	2.03921	2.00307	1.24648	1.34255	1.17256	1.05588	1.0383	0.993917	1.8451	1.75002	1.81603
158	1.59541	1.54634	1.43163	1.5232	1.91347	1.69848	3.07191	3.30549	3.14705	2.04645	1.95645	2.0566	1.3072	1.37599	1.13172	1.07449	1.07034	0.983949	1.87631	1.80992	1.93027
160	1.58304	1.50693	1.53972	1.4383	1.66752	1.60019	3.08714	3.34422	3.28433	2.03437	2.09195	1.99672	1.3028	1.24328	1.16037	1.04897	1.03799	0.989626	1.85598	1.78059	1.96917
162	1.40268	1.43598	1.48992	1.53998	1.70948	1.60486	2.98502	3.32237	3.44691	2.08233	2.0641	2.07041	1.23889	1.37725	1.11201	1.07978	1.04306	1.01148	1.93986	1.92153	1.89019
164	1.47131	1.63928	1.45692	1.48575	1.72655	1.72889	3.1457	3.09548	3.03116	2.07876	2.12321	1.99692	1.33158	1.29789	1.11525	1.01208	1.05227	0.988548	1.86569	1.73153	1.9566
166	1.51011	1.43177	1.57662	1.54925	1.75307	1.75926	3.05161	3.07176	3.42675	2.16884	2.21356	2.08824	1.28303	1.32533	1.14113	1.06344	1.02067	1.00375	1.89491	1.73274	1.95816
168	1.59667	1.60383	1.47807	1.38481	1.58409	1.6999	3.18766	3.16071	3.4497	2.09486	2.09341	1.98653	1.27124	1.3388	1.14114	1.02715	0.98801	0.977359	2.01631	1.85082	1.91827
170	1.37616	1.50982	1.52283	1.55149	1.71137	1.64679	3.11777	3.05968	3.27902	2.0986	2.0525	2.00888	1.26194	1.28562	1.11715	1.04888	1.05026	0.994238	1.83327	1.78229	2.00449
172	1.52909	1.43297	1.45748	1.60529	1.71605	1.76966	3.36865	3.22338	3.34579	2.14235	2.11339	2.147	1.21193	1.30993	1.14388	1.06979	1.03931	1.03816	1.96678	1.78992	1.94584
174	1.41623	1.49352	1.54524	1.47524	1.78826	1.81825	3.15128	3.39281	3.07487	2.0909	2.25413	1.94501	1.34991	1.30282	1.2114	1.08553	1.04109	0.993558	1.92522	1.783	2.13392
176	1.4392	1.53418	1.50327	1.54705	1.6357	1.77136	3.16416	3.2216	3.3331	1.99351	2.16125	2.05792	1.28649	1.34776	1.21342	1.08404	1.0487	0.974915	2.05596	1.76817	1.90438
178	1.47544	1.5273	1.5201	1.46694	1.75154	1.57411	3.1018	3.30468	3.30889	2.24408	2.13338	2.11007	1.29483	1.34078	1.14241	1.06887	1.01267	1.00175	1.85797	1.9185	1.93362
180	1.47978	1.5388	1.58003	1.52568	1.77073	1.67362	3.19773	3.29974	3.51505	2.03371	2.02665	2.04586	1.27054	1.31114	1.15041	1.0092	0.999743	0.98544	2.07259	1.86202	1.94863
182	1.40274	1.53741	1.44792	1.58883	1.68692	1.85166	3.39868	3.17633	3.34549	2.08781	2.04892	2.03219	1.33032	1.27032	1.18083	1.0761	1.05868	0.972745	1.92903	1.92156	2.09691
184	1.58991	1.48621	1.48993	1.46437	1.62708	1.58792	3.09518	3.15384	3.37073	2.11268	2.15718	2.04465	1.28942	1.30164	1.18905	1.08097	0.993835	1.04303	1.90597	1.78515	1.94323
186	1.48922	1.46521	1.39863	1.45747	1.75832	1.65829	3.19629	3.13692	3.23172	2.0589	2.15948	2.03587	1.29476	1.33168	1.12579	1.0534	1.05262	0.980072	2.02682	1.92363	1.96356
188	1.42534	1.57326	1.56354	1.48413	1.81399	1.64549	3.31103	3.21747	3.4227	2.1376	2.1676	2.05224	1.28287	1.32386	1.19486	1.05048	1.00563	0.99663	1.92916	1.96198	1.87875
190	1.33838	1.56921	1.56618	1.51261	1.79569	1.59659	3.34355	3.36787	3.48858	2.15504	2.14827	2.05842	1.26954	1.33878	1.12029	1.13178	1.0072	1.01897	2.01541	1.87047	1.91639
192	1.60007	1.6396	1.53951	1.49624	1.82455	1.65269	3.30791	3.52319	3.57195	2.17258	2.09092	2.13199	1.26828	1.35274	1.19212	1.09348	1.03692	1.02219	1.88241	1.9185	1.95333
194	1.54874	1.56881	1.45646	1.51365	1.77546	1.73247	3.68806	3.43971	3.44759	2.00282	2.16007	2.03534	1.27177	1.32973	1.16787	1.04735	1.04338	0.976707	1.9738	1.82265	2.01245
196	1.49691	1.49334	1.52162	1.53476	1.79179	1.63785	3.3322	3.26191	3.78443	2.08376	2.0731	2.02636	1.27764	1.28745	1.10481	1.00649	1.05736	0.984752	2.06169	2.06405	1.96071
198	1.41881	1.44823	1.56013	1.48933	1.71815	1.7511	3.39729	3.54497	3.48245	2.01154	2.16013	2.08137	1.28112	1.33293	1.15626	1.04818	1.03713	1.00653	2.14691	1.9908	1.97508
200	1.56054	1.54562	1.44162	1.37333	1.81567	1.70684	3.41624	3.22781	3.55291	2.08043	2.07871	2.15235	1.27409	1.32351	1.12777	1.06296	1.09305	1.02221	2.06326	2.10904	1.73314
202	1.48157	1.60536	1.43454	1.53279	1.79822	1.64816	3.4456	3.31531	3.62556	2.08641	2.16188	2.1346	1.28492	1.33227	1.15962	1.04872	1.03915	1.01168	1.9969	1.87374	2.10045
204	1.54768	1.47746	1.4482	1.45102	1.74097	1.69954	3.3336	3.40299	3.47338	2.09963	2.08159	2.0382	1.34252	1.28697	1.13681	1.08513	1.03713	0.986001	2.08011	2.10794	2.12728
206	1.44891	1.59662	1.46942	1.41691	1.59855	1.69268	3.43574	3.42931	3.57503	2.03602	2.28631	2.17368	1.26572	1.33176	1.12172	1.06404	0.972515	1.0835	2.03915	1.79575	1.82861
208	1.39213	1.62398	1.51356	1.49266	1.68004	1.68264	3.44814	3.34517	3.76577	2.19447	2.15361	2.0607	1.31067	1.37112	1.08803	1.03076	1.04453	1.02354	2.06104	1.92221	2.08693
210	1.33461	1.47369	1.67991	1.5054	1.81382	1.6716	3.18899	3.41268	3.74528	2.13447	2.09883	2.05434	1.30738	1.31651	1.16627	1.0651	1.03725	1.00622	1.95733	1.91268	2.11297
212	1.56935	1.45275	1.53377	1.49952	1.68399	1.69968	3.353	3.54454	3.64735	2.18808	2.19196	2.08491	1.28317	1.37736	1.16458	1.01334	1.04134	0.980282	1.96885	1.81365	1.94149
214	1.37637	1.48438	1.43643	1.53961	1.74809	1.69263	3.55504	3.16173	3.77398	2.14932	2.11829	2.11476	1.27248	1.31169	1.11819	1.04429	1.02982	1.0136	2.0776	1.88496	1.93686
216	1.53654	1.54079	1.59667	1.42949	1.65715	1.77579	3.32985	3.33001	3.68854	2.26054	2.16194	2.14979	1.30259	1.36338	1.17577	1.04314	0.974369	1.02317	1.97607	1.83581	2.04407
218	1.39007	1.6168	1.49	1.47642	1.6729	1.68866	3.46832	3.53723	3.58247	2.06344	2.17573	2.09435	1.25547	1.31574	1.13204	1.0775	1.10711	1.00089	2.00463	1.86845	2.08791
220	1.40607	1.68422	1.55097	1.50773	1.64525	1.61051	3.44223	3.61625	3.49198	2.16235	2.20239	2.04235	1.29737	1.30892	1.16952	1.04804	1.01832	0.991966	2.06822	1.89402	2.04277
222	1.42817	1.61952	1.44401	1.56281	1.66606	1.63049	3.51267	3.1621	3.64593	2.28371	2.25072	2.05328	1.28991	1.31581	1.18591	1.07541	1.02474	1.00462	1.85767	1.91227	2.1035
224	1.45856	1.46992	1.54858	1.47105	1.68837	1.65492	3.3675	3.64634	3.584	2.08797	2.16707	2.17577	1.21919	1.3254	1.1442	1.0592	1.03547	0.989012	2.01704	1.97819	1.95895
226	1.49362	1.50607	1.52265	1.47177	1.70795	1.7633	3.55816	3.66375	3.60634	2.12619	2.17344	2.18512	1.27999	1.3489	1.16868	1.02437	1.03393	0.984865	2.05783	1.91404	1.96102
228	1.42916	1.55271	1.48962	1.47457	1.68833	1.53883	3.65703	3.56032	3.63939	2.20212	2.21424	2.03059	1.32716	1.26896	1.17466	1.04415	1.05132	0.963932	2.05347	1.99733	2.15421
230	1.48902	1.47057	1.40424	1.4409	1.71476	1.67996	3.45296	3.37398	3.84493	2.15658	2.19483	2.07445	1.23661	1.34594	1.15669	1.09293	0.993576	0.945346	1.98751	1.92481	2.01779
232	1.44477	1.54584	1.47948	1.44617	1.60258	1.70575	3.32663	3.68104	3.73629	2.16082	2.28387	2.12403	1.34241	1.30616	1.14732	1.07727	1.00781	1.00821	2.02583	1.87016	1.96455
234	1.5895	1.52589	1.47083	1.338	1.73296	1.59585	3.65857	3.52211	3.70365	2.22529	2.16902	2.04954	1.27222	1.37671	1.19746	1.04661	0.978316	0.988983	2.18606	2.11106	2.14649
236	1.55299	1.55585	1.40532	1.41498	1.73062	1.62629	3.36165	3.44143	3.58936	2.22412	2.17281	2.07075	1.27395	1.31172	1.12946	1.05553	1.00283	0.984563	1.99548	1.94056	2.05448
238	1.46997	1.45042	1.67918	1.34716	1.74831	1.60144	3.67118	3.64548	3.67106	2.26792	2.10266	2.12828	1.27564	1.30423	1.13687	1.08013	0.969733	1.00515	1.95397	1.986	2.03176
240	1.51024	1.58787	1.42433	1.44799	1.78263	1.74168	3.49131	3.32775	3.58828	2.21981	2.3705	2.14662	1.30961	1.36084	1.15053	1.07739	1.00053	0.992878	1.94107	1.76208	2.09461
242	1.51185	1.58432	1.53587	1.50715	1.72482	1.75848	3.37697	3.65606	3.84482	2.17586	2.28883	2.13386	1.27113	1.34439	1.11072	1.06381	0.973363	1.03575	2.05311	1.921	2.13708
244	1.40339	1.48547	1.51317	1.49298	1.63105	1.81092	3.35807	3.57543	3.88729	2.1946	2.31647	2.07617	1.38748	1.35165	1.14775	1.03654	1.04344	0.967292	2.07917	1.932	2.08729
246	1.43567	1.60739	1.47823	1.37281	1.73155	1.62217	3.49637	3.72629	3.67009	2.31218	2.32436	2.18048	1.24823	1.27624	1.13344	1.03225	0.997633	1.02912	2.00715	1.92368	2.08301
248	1.4239	1.48376	1.51676	1.3358	1.55007	1.69878	3.70402	3.52508	3.89549	2.15039	2.16992	2.14535	1.26179	1.39187	1.19134	1.00566	0.953917	0.958262	2.09337	1.9607	2.05863
250	1.41044	1.53946	1.43763	1.51929	1.71343	1.56537	3.72418	3.9584	3.66073	2.14746	2.24194	2.0908	1.3377	1.37049	1.1406	1.0718	0.980431	1.01628	2.10056	1.98106	2.15455
252	1.50298	1.55535	1.54366	1.50405	1.70145	1.67133	3.55013	3.6138	3.67584	2.18204	2.31434	2.19862	1.3029	1.28829	1.19813	0.98666	1.02148	1.00973	2.1687	1.79118	2.1365
254	1.43212	1.50125	1.46833	1.57261	1.69121	1.65382	3.50959	3.48281	3.61537	2.28397	2.26789	2.08541	1.30068	1.29258	1.15575	1.05278	0.994863	1.00616	1.955	1.91293	2.12315
256	1.4897	1.47563	1.47483	1.4813	1.67355	1.63901	3.51873	3.74168	3.6214	2.04058	2.23293	2.14821	1.31731	1.32242	1.14901	1.0572	1.01035	1.00117	2.09787	1.9718	2.02764
258	1.4644	1.52311	1.4878	1.4727	1.58459	1.62713	3.42347	3.44203	3.77937	2.17837	2.27793	2.1524	1.30516	1.38837	1.14207	0.997314	1.02499	0.973184	2.02866	2.0036	2.08018
260	1.44576	1.4768	1.49547	1.36887	1.65665	1.86546	3.52762	3.79398	3.79483	2.17065	2.34205	2.11089	1.21973	1.2519	1.15578	1.03632	0.992775	0.962142	2.12756	1.87858	2.06307
262	1.42162	1.5475	1.49412	1.41529	1.77139	1.55514	3.71305	3.59895	3.45119	2.19827	2.19347	2.19344	1.26447	1.39619	1.10625	1.08139	1.03272	0.967907	2.15698	1.82055	1.94777
264	1.46265	1.53357	1.46778	1.60276	1.68853	1.62744	3.57029	3.55329	3.56174	2.11842	2.34573	2.08711	1.28445	1.38717	1.11379	1.01781	1.00188	0.990134	2.1273	1.92852	2.07874
266	1.52734	1.51748	1.61696	1.48623	1.83982	1.55846	3.59261	3.78853	3.55994	2.22119	2.17326	2.17907	1.27913	1.29931	1.17251	1.05744	0.969275	0.969598	2.07075	2.14127	1.95471
268	1.44659	1.49806	1.44098	1.45349	1.62976	1.80437	3.42257	3.61634	3.86814	2.23193	2.2333	2.13516	1.30649	1.26018	1.13017	1.03871	0.976761	0.983482	2.05877	1.87644	2.10605
270	1.5502	1.57157	1.63953	1.49586	1.56837	1.61506	3.60249	3.70078	3.82744	2.25509	2.21727	2.17691	1.31341	1.35719	1.16226	1.02294	1.00563	1.01782	1.99144	2.13888	2.01594
272	1.47775	1.53718	1.49677	1.48551	1.61858	1.60295	3.69925	3.52714	3.82455	2.17556	2.22269	2.17628	1.29049	1.28304	1.11211	1.02756	1.02201	0.96852	2.10725	2.01116	2.11512
274	1.47999	1.57666	1.53462	1.46814	1.65797	1.62922	3.77571	3.82343	3.59287	2.21491	2.24394	2.16546	1.27931	1.36169	1.15287	1.03553	1.00235	1.00923	2.16608	1.8915	1.96997
276	1.45667	1.47829	1.34775	1.45923	1.64257	1.58731	3.4538	3.72744	4.09868	2.16008	2.24412	2.13323	1.32018	1.27699	1.14128	1.06107	0.978984	1.00612	1.98946	2.02222	2.14787
278	1.53748	1.59156	1.39542	1.39622	1.63155	1.72204	3.75103	3.66426	3.73356	2.22067	2.28916	2.17268	1.29157	1.32788	1.16427	1.03042	0.997603	0.976413	2.15091	1.96744	1.98475
280	1.32723	1.46359	1.4401	1.50176	1.69158	1.69984	3.66713	3.96648	3.94811	2.23164	2.26715	2.2267	1.29366	1.30183	1.17486	0.986751	0.944271	0.967525	2.02553	1.99565	2.01583
282	1.47834	1.50559	1.49036	1.36132	1.59356	1.57289	3.77682	3.7094	4.06211	2.19229	2.22519	2.19897	1.29001	1.32907	1.16071	1.0312	1.03726	0.999042	2.17435	1.90833	1.97355
284	1.44816	1.39537	1.40385	1.43666	1.64092	1.63078	3.7221	3.56402	3.96939	2.21932	2.35263	2.23114	1.3011	1.28418	1.1249	1.04049	1.00117	0.953131	2.09374	1.91992	1.98156
286	1.48347	1.52148	1.52404	1.43611	1.70082	1.62209	3.67665	3.71622	3.88152	2.23202	2.31078	2.16793	1.32821	1.32101	1.17677	1.03443	1.01332	1.00035	2.03656	1.90341	2.01812
288	1.3839	1.55771	1.51873	1.37643	1.75914	1.64052	3.70552	3.65598	3.86889	2.26068	2.30863	2.15454	1.26622	1.36304	1.11876	1.04532	1.00658	0.979603	2.14697	2.01107	2.04778
290	1.44656	1.5515	1.41742	1.4764	1.77351	1.57634	3.69422	3.99237	3.91076	2.28699	2.26094	2.17053	1.33499	1.37907	1.21052	1.03823	0.993281	0.964248	2.02785	2.01693	2.14281
292	1.3789	1.48695	1.45373	1.3889	1.60875	1.65588	3.80865	3.67793	4.18486	2.28012	2.24129	2.14711	1.25767	1.29078	1.12613	1.0798	1.01291	0.999511	2.12002	1.9233	2.10826
294	1.43465	1.47818	1.32573	1.40306	1.64183	1.72196	3.75525	3.74076	3.78475	2.20617	2.25323	2.31886	1.30234	1.33014	1.17447	1.04574	0.989852	0.966384	2.08587	1.98568	2.01934
296	1.44522	1.59918	1.45469	1.49041	1.5882	1.54721	3.82313	3.71316	3.86685	2.39458	2.35487	2.19452	1.28782	1.39301	1.20382	1.02317	1.07036	1.00761	2.01319	1.85545	2.07725
298	1.40905	1.6255	1.52291	1.45399	1.66293	1.7224	3.87258	3.71964	3.83201	2.30936	2.40036	2.24019	1.32724	1.36066	1.09649	1.03413	1.01512	0.95975	2.07028	2.00241	1.97286
300	1.45375	1.46731	1.40614	1.54071	1.71461	1.70644	3.82929	3.82585	3.9125	2.18599	2.292	2.15559	1.30896	1.27695	1.11796	1.05299	0.99734	0.982368	2.13695	1.94157	2.08956

## Sheet: Figure 4B
Time (minutes)	Quenched Probe (0.05 μM)			Positive Control (10x SL Target)			Negative Control (0.1x SL target)			Positive Control (10x Trn Target)			Negative Control (5 nM Trn Target)			Negative Control (100x Displacer)			5 nM Amplification
0	41364	51299	34635	147957	147522	136892	47593	45470	47334	154773	167009	166575	51638	46383	39756	56996	59417	57530	59001	62771	65837
2	46147	42740	46426	165549	151254	166779	42361	45750	52638	181289	181822	184311	46260	52122	45513	61840	56219	63977	66170	64356	71990
4	44773	39707	38561	179377	200595	204792	41677	43086	46927	196322	196228	193942	51414	49052	53090	67278	70124	67233	66974	72767	76058
6	41080	45855	41967	197763	222334	225608	43859	44677	49711	198914	201817	234906	52064	46489	58220	66436	72448	62364	73491	75780	78771
8	43765	42073	39044	221650	234400	232750	47179	47539	44388	224344	217703	225530	45192	44338	49960	65344	68410	75174	72622	87838	68360
10	45466	40647	42774	250204	251497	255687	54423	47186	43948	216291	230123	221855	48248	44180	48254	68334	72601	69354	83905	76986	84810
12	42111	44790	43693	242259	250295	258907	42647	40975	50758	214314	227501	246571	46428	51597	56345	75135	73653	61019	74074	87909	80377
14	41306	40187	47303	253375	274748	285801	45505	48571	53812	229467	228403	230116	48368	51018	48920	65366	70146	73897	88078	94123	91124
16	47997	40795	43829	282290	280948	296342	50437	46514	43828	249439	231177	249987	51213	49998	47922	68655	66127	70430	83455	86232	91228
18	43799	44555	40668	289184	305709	307723	40622	43687	50730	223539	237563	232388	49760	54846	49652	62856	74080	70284	80097	81525	91093
20	47885	48611	42248	302105	284498	320731	51035	45908	43523	239994	245737	242483	50591	45255	45643	73450	77698	77409	92252	78822	97592
22	44164	43668	39608	309451	293230	340148	40544	41929	51147	237475	240984	248348	45811	42602	54178	71725	72301	75756	88854	87972	95374
24	47825	39231	43392	330762	306606	328660	50889	45019	45474	244243	222269	253534	54861	52733	51331	74277	67209	73975	94925	93435	99075
26	43147	43839	44792	313772	309468	339700	48107	45230	49564	256406	245911	247851	47276	56486	54855	71123	71125	75645	88365	91985	90576
28	43871	39540	43174	327139	317933	341094	51907	52514	53970	258282	240899	251960	50892	54499	52688	77687	79615	75094	95376	94831	94035
30	44258	38977	46447	323332	306874	359736	48130	51683	50981	250801	256126	255517	54053	46084	59025	72057	79001	78073	92118	94474	110740
32	44480	42579	43930	335532	328368	362425	55627	49906	50531	243849	243744	265134	50164	49800	48060	76181	77563	73199	88863	100295	101233
34	37585	40177	40189	340369	326222	361034	48674	46420	55849	264197	246063	269457	49931	58435	50438	76765	75960	83031	99223	107308	104078
36	39250	43013	40215	345577	324022	368429	49968	51546	46915	259402	251127	257558	55540	50951	49707	84984	86845	82415	95642	103164	93976
38	46975	40356	35806	347141	326551	376761	49516	44879	46859	254481	257903	259276	48512	52736	56251	72476	72547	86339	90725	97055	96056
40	42825	42917	46142	344338	345244	370888	57759	50330	46521	263775	257210	254235	52014	56290	42824	71889	83348	71443	94226	92756	97721
42	46581	43921	40350	360556	351824	380000	49694	43838	48156	268221	242670	259625	50600	57116	53453	81529	80795	74452	109895	99426	112251
44	48581	38265	38071	348183	340503	377518	49103	47434	47935	261891	276915	260738	54976	49665	54162	85591	72430	82492	99992	96108	117132
46	52890	41465	44807	356830	334484	389198	48526	45208	47069	251649	258150	265772	54496	55607	52247	76817	83704	84056	100429	103640	104311
48	45095	39831	43145	371822	351369	393912	48696	41856	44749	265657	260148	257535	55045	51509	53490	77223	85042	82397	106282	109443	111896
50	42728	41961	41547	360012	342358	392419	47191	46397	51313	262106	269037	269790	48969	56639	52624	79407	83332	80085	99343	115251	112136
52	46873	44652	43994	351977	346867	396450	53868	51046	51628	278613	260520	270550	52318	55245	43612	80249	82907	93949	110464	106518	107177
54	42956	44481	44981	366697	350822	397988	49295	48623	48824	247758	270576	272644	47673	50564	50984	77196	82573	80714	100902	112023	106843
56	41447	38960	43327	371321	350084	407065	47872	47444	48633	255315	268668	275394	55299	53113	54258	83553	80120	85229	108954	112757	114576
58	44745	42505	41411	350894	357326	404711	49917	45625	52999	263506	256914	266705	53488	47814	54684	86259	86863	80652	105069	104936	118395
60	43428	42073	35203	361192	355498	402935	53194	47206	46469	266460	266707	277231	55599	56225	48929	77801	92812	90748	109359	110944	119715
62	44656	34784	41999	367709	358328	404370	45589	45167	52756	269560	257470	269241	52932	53705	48597	75238	87764	91558	116581	114111	113587
64	41961	41338	37356	373367	354356	404946	54216	47256	53269	267774	259689	292198	52096	54646	56887	80034	87235	87743	116203	109454	127914
66	48511	36745	40228	360452	375174	408891	53631	48049	54028	266397	259471	277686	51839	50981	51469	90541	83330	93599	114390	115556	119493
68	46191	38974	42958	375633	367931	427831	47414	49341	55320	282062	266334	270368	48567	58483	57045	89715	86767	90576	113221	113384	114751
70	45448	41958	40699	365462	355686	412604	47363	46830	55019	274425	270273	287028	48937	52352	55006	83702	91187	96036	103950	113660	120415
72	40825	41505	39840	367605	347804	402271	49086	47692	46125	266608	270179	283111	52191	52509	51401	90830	86666	97330	110727	120564	121470
74	49929	40482	45376	364088	352967	423952	51659	44764	54490	287163	259228	296018	45581	59658	47664	85048	91487	90652	115577	120788	131708
76	39577	39207	44303	383756	352829	410622	48764	45571	53338	270284	281264	280199	55542	52276	54093	81456	88577	90868	117251	119077	125316
78	42499	40375	44890	368961	383536	417660	46505	46909	50181	276865	279035	282433	47607	48026	56100	89968	83693	93660	111165	125900	119908
80	44441	40395	36732	374458	370926	414717	43486	49018	48644	266788	281251	288081	53223	55875	52197	93095	96618	85739	121211	128721	121092
82	49329	38414	38129	404218	371629	424582	49221	51829	53662	273203	267321	274942	55328	56859	52101	84865	95443	96149	118462	121084	121368
84	46342	43999	42054	383710	367238	419482	47979	53713	55287	273610	269197	278925	54473	54916	47586	90187	87851	87056	123182	129855	124744
86	37381	46529	39879	388322	385291	415260	46629	46795	51571	295655	266090	295851	56201	52722	52938	92152	88400	94609	125512	119455	136811
88	45164	45075	40216	390590	370065	395815	48102	51967	51212	272575	284178	288274	49023	54833	52242	86685	91182	91011	121593	131060	128234
90	42761	45305	37424	385619	362160	404987	54199	50174	49416	290891	277470	282346	45423	51974	46785	88045	88239	91990	119963	130452	127431
92	38218	43428	41496	380999	356503	413926	50515	50139	53758	281066	272490	283074	49218	47404	52981	91637	82981	93550	133104	123478	126989
94	38969	45240	45790	378346	368842	411682	49572	49528	48336	269198	267294	283638	50711	54008	54121	91109	96563	89793	127351	116670	128160
96	51127	39716	38580	381524	370351	428556	54567	52081	54141	288449	269543	286100	45636	49723	50738	85403	94975	88353	121057	125641	131882
98	41165	40626	41430	374068	367210	423163	48010	55036	52543	269635	282259	297123	60605	54316	54303	86235	92384	97923	124732	127675	133722
100	43070	37187	39501	380655	372034	421441	48978	47028	53476	276235	285313	304413	57502	53018	56008	78924	98551	101565	114608	124531	141779
102	47040	37102	36377	394000	363396	413850	58359	47815	53064	276240	283743	279724	51257	49726	52280	94242	93023	92663	122915	135205	132747
104	42337	41848	37891	363790	382770	405379	49421	56839	51169	272282	275669	297548	53016	50654	64075	85758	92622	109260	132963	126309	133727
106	42559	47769	41172	388944	379538	428445	53607	49277	50959	282614	275138	288021	48616	53260	53535	91064	94610	98959	121955	133245	140754
108	42248	42519	40609	389731	375367	420157	51044	45466	55549	291966	262820	291732	47545	48426	46084	90205	81966	103089	136401	134663	133475
110	45523	41075	39944	390336	366159	435049	49408	58794	52846	301583	270218	311883	56554	49631	52208	94275	98149	93404	134972	136780	146353
112	40973	41198	44381	392941	376596	432908	49792	54178	55966	291776	289993	278842	53506	57093	56841	91501	94824	92128	138961	133824	138352
114	44305	48832	41140	377764	369013	435576	52896	52145	55080	278240	289879	283834	51478	51270	55215	89600	101227	101731	131386	125742	134483
116	43176	42520	43634	374100	367479	432214	46517	52432	52128	278701	283252	289640	50208	50469	59697	100331	100726	99957	135743	131787	140828
118	40759	44178	34771	379267	385241	428569	56484	50944	54400	279306	272932	284827	49134	49127	57538	92983	96764	93170	139935	151586	149050
120	38293	43086	34435	378337	371394	418442	49340	54803	51548	283565	276423	289841	49507	52279	51830	91169	99256	99885	135091	150468	123381
122	43654	45566	47195	395946	373281	437528	50207	52043	52582	298218	285356	295241	47360	52453	56633	81953	96927	94376	125309	143491	142165
124	41788	41425	42577	388420	371018	414974	45258	54178	50247	277708	284339	293112	56009	53816	52264	98038	99711	101298	151157	139819	136106
126	45480	42481	43382	390992	363489	439789	50526	41773	53157	286130	297410	288460	46262	53327	51007	86685	102063	90123	138893	134231	138491
128	42420	38824	40010	377064	359598	429300	44728	55791	57999	279180	280594	286934	55483	53242	47843	93625	95481	101784	138202	141704	142056
130	41765	41398	43375	377620	364438	445211	46414	53243	53570	272674	273172	297477	49780	54416	51706	86162	99849	102649	124091	144541	144899
132	40154	40358	39167	385886	364182	410054	51449	51989	48436	289243	286937	292621	57980	50391	46388	86402	104450	97176	127376	148554	145200
134	42391	41078	36726	387083	365981	434978	50592	43347	52264	282322	283000	285705	51049	58979	53142	91813	89180	91051	129714	142829	154201
136	45692	45213	36832	382711	366586	425636	48700	49310	54264	275956	275695	313348	50859	57409	49235	90910	101335	100347	134599	142508	145503
138	44620	41657	38631	371839	380126	422105	45075	46783	51098	298015	273078	292590	50784	54490	50634	99373	108181	96149	137414	145880	149309
140	42881	37581	40804	396240	379661	430423	52013	48536	55812	299361	271110	314226	59323	50153	53232	102677	91187	100098	136261	149957	156757
142	36091	39700	37226	379174	390436	418290	55327	47534	55475	276705	290756	295902	46714	53959	53128	104520	101223	115188	139275	145094	153009
144	40553	39913	36947	386070	375771	416302	49692	49700	50502	298826	295832	293821	49773	53763	54917	85397	96143	95213	144564	146887	156588
146	43277	40973	38475	387560	379610	438845	54251	53943	49805	295734	281099	301392	51904	54045	54044	104015	92443	101789	134336	141685	159764
148	40599	41540	44484	380249	371131	432032	49508	43625	48149	284892	288200	302991	51181	53199	54846	96058	92415	100721	142141	146546	148609
150	45153	45257	43212	375518	369559	442170	48936	51601	52201	286303	281795	297117	55174	57032	49837	102334	98183	109061	141451	141268	157730
152	44883	42577	46778	388447	384613	437011	46089	50464	53447	287129	294749	292799	53981	41972	52770	97207	100599	104015	142719	146182	150300
154	36721	43635	41087	399246	387112	414639	53122	47737	55442	275214	286622	295058	52613	49553	54836	95687	93118	99190	149272	154502	162047
156	44800	42611	40993	386603	371339	452889	56093	49669	57331	278687	298890	300784	48563	51764	51084	93333	100140	108628	146457	149780	157166
158	42989	45568	42776	384444	360736	443834	46173	46140	51552	283313	285537	302913	53502	47736	55433	99538	99813	103268	133886	153470	158889
160	44602	38360	40541	388118	382097	433033	47164	47742	49655	283126	293151	296347	60523	57268	52745	100562	97693	106007	146903	150990	157729
162	41276	41891	40375	394661	379935	441168	50226	50674	50775	292173	293850	297589	49067	50008	45499	95449	104526	108124	142112	147891	157699
164	44670	46891	39784	381179	381610	423197	55001	50095	54649	293701	290680	287536	55465	55005	53329	95343	106781	105213	140549	157388	154054
166	44747	44234	41221	394768	365795	427101	53576	51320	53570	299050	285528	303602	49057	46506	54166	92280	110429	113759	147082	150604	155047
168	38284	40233	36748	390285	382753	428311	49884	53541	55714	281166	297317	304647	51032	46421	49753	97168	111157	103133	145677	157182	159172
170	45531	45760	52900	397951	357856	438722	48221	52387	56592	293797	278981	307296	53595	51209	50772	99191	101956	110328	144934	168479	158956
172	41113	37791	43859	392006	374268	430087	51912	46661	54326	287523	302717	282931	54079	54576	51119	99781	97103	112991	147388	152928	159483
174	40279	44644	37259	376404	394083	431278	54186	50985	53811	291474	295056	303274	51834	47588	48981	103106	104032	106990	144701	159751	159617
176	41236	40196	40500	382968	373500	448181	50930	58647	57744	298209	299686	305167	51461	54203	49528	102009	104179	108833	145010	151540	161978
178	39132	40863	36023	376492	373536	427001	49031	50850	48426	303752	288477	303733	46355	54463	61976	106827	108403	108720	158790	152414	150966
180	41556	41300	42259	397719	372746	437298	55836	49148	54076	287344	287873	298074	53063	54235	58536	107660	105458	110586	154132	158374	161920
182	42809	41457	41294	389252	385066	441422	52800	53681	59182	299172	284695	313573	50226	59731	56909	103978	108794	107677	144551	151354	165070
184	42128	39518	42722	397179	380817	418377	52480	56296	53084	284907	300915	293660	51667	50381	52745	98641	106883	103587	146979	160593	159164
186	39148	37618	39701	386522	377003	438971	50350	50917	52001	300826	287558	309154	45930	51547	49070	103969	103833	105970	148277	163002	163171
188	39087	37208	42507	386893	399210	428538	57563	53045	57729	284026	296848	307626	48730	52211	53729	106694	105487	105348	157075	166622	175096
190	44554	40271	42917	382368	377713	428870	45197	50188	58324	294436	277380	318244	48640	54027	46783	107778	103385	110574	151746	158052	167029
192	37362	41932	38609	411842	380873	442921	50856	46123	54046	290784	287373	302596	48865	50130	46411	109467	102010	105196	144973	155114	169436
194	38443	41998	41217	406585	377496	412756	45506	52051	54919	281415	296297	302619	48793	60606	50123	103408	99687	113833	142123	155267	172750
196	38500	39369	35589	396350	385679	436380	53535	48176	57604	288617	295366	314928	52706	50504	48096	104914	111313	109828	153799	167842	161575
198	42872	38958	41107	386957	389364	441397	46506	55570	54194	302133	284204	317867	51056	56465	50907	101952	103216	105341	162210	179543	167651
200	46191	43969	39065	398606	388608	433677	51478	50986	57615	294501	285849	278769	53008	58295	52631	103630	102187	98857	158366	164833	168323
202	40679	46602	40973	401707	384957	446743	51296	51330	56375	279479	291470	298916	48053	55782	50856	97609	116832	119799	149818	170355	172077
204	41966	45373	41853	387284	395505	445800	54815	47515	57478	302523	311651	302365	47529	52346	49618	102168	109071	117991	157087	162930	162973
206	42952	42721	41206	403617	371626	442948	49788	50171	52625	285697	275159	307242	48835	52252	54802	105961	110763	107755	148400	170206	171912
208	44716	42733	50196	397965	369069	425407	59188	51523	50300	287348	291453	298725	47511	53418	53292	96518	118231	124679	153995	165539	171630
210	44535	44132	41463	383196	394375	447735	51186	53084	56416	289929	288784	308646	47610	52888	53433	113890	105985	110040	150516	170632	171402
212	43639	45947	45477	387731	385404	430561	51962	50432	58977	293547	291344	325144	51772	49506	50289	108702	107482	113207	158576	161231	172670
214	42283	41270	43948	402140	372779	430061	53101	53294	52344	296612	307115	306446	52539	53066	48736	106877	110942	115654	158052	165037	174886
216	37444	43059	39595	379070	396005	449858	46895	60962	51524	291716	290759	309313	50762	56839	47602	104600	112138	111891	159522	163656	175402
218	40856	40341	38845	398364	402870	427836	44774	45794	52604	304179	305244	316284	52316	53414	62486	110589	106674	109131	149242	164946	162479
220	43169	45777	38813	398223	382051	430648	44750	50477	51114	303972	294163	309691	51950	54755	54752	105393	109892	111365	170784	170154	176406
222	34897	40201	38370	400249	383506	419784	50278	52081	56318	280578	289936	302234	49259	55474	55514	113214	113611	104427	148883	169313	178794
224	44227	39535	38142	407649	395324	448196	50232	50369	58828	294840	295610	295219	54584	52143	54848	103822	109950	100156	164247	161480	178497
226	41657	42944	36717	392623	402390	445425	54876	47894	53756	291968	309799	303823	48143	52455	53047	105005	105056	105754	158990	167468	170592
228	38574	42903	40530	399055	390041	447981	51870	47159	53088	310253	305106	306629	53818	55017	57868	113146	113355	114054	156260	170053	180742
230	42751	46377	38865	388630	410973	446270	51620	52901	57389	296103	288613	297825	53160	49476	51512	116148	111655	113987	160672	165779	173823
232	38106	41444	42939	397660	385167	446703	49706	47174	52131	294762	287196	319515	50336	55378	56903	99034	115312	109313	170844	171809	186395
234	42553	42806	41599	387970	393020	452407	54901	59956	45701	280699	295767	319067	44931	54050	55475	109109	111496	109786	150892	175560	179371
236	42938	39399	40437	405971	399188	434548	55196	53178	56126	293340	293593	317088	49657	50612	49928	110338	114191	119380	169800	161668	188275
238	40123	45742	41007	404210	385652	428643	59517	51446	46039	302709	296932	309266	52491	59605	56512	94292	114466	117088	170163	163368	177334
240	42586	44573	40117	392152	385504	439682	51442	51615	60984	304586	286870	318944	47398	51040	55037	115855	114975	114192	167760	169344	183797
242	39417	36897	39581	399172	385436	441412	53699	54246	52298	285746	292430	294015	49252	49221	58008	116862	113086	103794	171278	173393	187325
244	43987	45597	37615	393579	388355	444218	54471	52481	52710	287598	293526	325183	46788	52906	50755	110407	105079	112137	161477	170749	172347
246	40526	40917	43773	387441	373771	447172	52903	48231	57552	280683	305125	314104	47896	51417	55426	114885	116576	124656	175048	169748	185226
248	40246	39679	44163	391515	396070	450428	46985	50734	54128	298469	297394	307385	55730	54437	55010	111072	116791	122474	156895	184687	176450
250	44724	39579	44164	391777	379305	435902	48141	45393	54997	292472	296970	307905	50419	57453	57518	103625	113767	115108	164137	169572	193060
252	39270	41070	39333	378858	390018	440223	48840	51160	55748	294139	283214	307698	50677	52144	54830	108249	112199	116632	158273	162688	184009
254	38074	40916	35943	401247	377192	438366	47722	55489	51428	300901	296979	333778	53088	55905	56946	108639	115018	120888	173711	181066	188815
256	47858	41585	35780	407234	380063	440045	49657	48512	58293	288957	290627	314250	55265	58637	54398	110603	103608	115939	181951	177354	184695
258	48833	44524	39094	404564	382552	433634	53428	49044	56605	303338	295344	301776	49672	51011	54580	109284	109465	119050	167482	186597	168217
260	40857	38115	44799	385552	372149	419549	52262	51591	50250	282714	288829	296060	48290	53650	51834	123133	110462	119839	175248	179765	185264
262	41041	45499	39204	383201	380012	473483	47727	53193	51744	286251	298531	301583	52088	51498	59631	111052	108181	124169	163422	177364	196896
264	41185	43182	40065	400152	385965	447585	58512	48879	59977	275886	305356	312594	53779	53249	59040	110444	107564	117790	161631	173092	194989
266	38526	44709	39471	397988	386067	442090	47603	51032	51606	306552	299669	312959	51893	52664	56466	109524	120460	126272	166926	179115	180760
268	38540	37751	45351	387912	410863	442152	49469	53793	47464	288084	288953	311744	50222	47324	57001	106566	116249	116319	160901	178381	189585
270	39080	40634	34221	390708	387830	421509	50296	50495	59695	292222	294633	302161	53669	55479	59222	111216	103987	118801	174161	171729	192214
272	36240	38718	41836	395470	393186	454322	48563	51077	51532	298224	298326	304510	56436	52833	46289	108706	115348	121525	173967	186473	189295
274	44475	40403	39694	394751	389525	446716	50387	49050	48679	303584	295364	317281	48228	54949	57323	108827	113802	120883	172026	190645	193393
276	45543	46061	37398	382429	381299	428262	53459	53172	52952	271614	303212	315603	48478	48909	52753	119046	111709	119506	175676	173296	194049
278	43354	41737	35554	385108	390856	437941	48018	54966	52634	294561	309018	309784	47066	53032	52919	110453	115110	128101	172667	176284	187869
280	49735	43446	39393	389837	396842	443791	54752	51055	54655	297355	297762	298267	47517	60083	49513	116919	116631	121357	171883	180709	192186
282	41447	39575	36146	402250	396477	432227	52211	49656	51116	284179	307682	304765	50582	55813	48287	113430	125675	121868	182679	180915	194519
284	41708	40493	43413	398858	393229	448454	48839	51473	46598	289393	280063	312452	44015	51426	53574	113899	105922	120965	187356	175597	181273
286	42065	45743	39990	412084	383811	439919	48604	48667	52718	283755	279578	322967	50312	51882	61249	110893	113327	124374	157820	166274	183939
288	44706	42324	38005	407091	381803	424906	53718	51291	56899	293865	289452	300670	51687	50275	53223	113459	118902	119259	163036	190835	185867
290	39678	39128	46111	389798	391993	454084	54370	51407	59749	299168	286983	305042	57823	56364	54173	113309	116013	122253	164333	170479	193596
292	36634	43682	43977	388218	398197	437970	56118	49259	52554	292222	286581	304880	46960	54395	48308	116932	115100	125276	181378	178622	181390
294	39778	39659	41867	395860	387901	450418	48685	53782	48448	288321	301922	308352	50063	54552	53925	115771	123098	128839	173775	187237	178575
296	48145	38098	41698	396470	369816	464629	53711	55221	53128	291587	296844	315792	52566	50596	54410	112267	118062	118501	168208	183008	185424
298	39495	38883	42743	421741	424170	432036	46465	52934	58885	305673	297301	296200	43329	50063	54299	117468	112857	126363	168615	185086	195328
300	42915	39261	41768	399687	427201	446736	54045	53144	50816	277922	285106	305580	54758	48651	47691	106048	118199	127168	179597	182010	193886

## Sheet: Figure 4C
Time (minutes)	Quenched Probe (0.05 μM)			Positive Control (10x SL Target)			Negative Control (0.1x SL target)			Positive Control (10x Trn Target)			Negative Control (5 nM Trn Target)			Negative Control (100x Displacer)			5 nM Amplification
0	17501	15495	17351	55511	50834	55235	18995	15118	17243	76152	71155	73605	16733	15731	14123	16266	16763	21546	18383	17818	21676
2	21187	16860	16490	81529	75797	81440	16963	17415	21183	92384	92342	99513	18609	19345	23400	22168	18972	20249	22083	19640	20802
4	17652	18774	19398	90200	90590	91157	16006	14235	18821	107256	92133	107382	19835	20018	19335	23050	18508	19317	23863	20136	26367
6	13388	17196	13216	115355	115995	113171	15026	16347	17161	109993	109715	113664	20614	19183	19847	18006	16609	17221	23667	19705	19613
8	13963	15983	17694	129221	121263	130440	18342	17676	17903	119756	114959	120042	16481	18796	20835	19868	18710	22781	22134	21447	25624
10	17594	15203	16209	138858	129017	135924	17576	16771	15781	127302	114225	116874	20285	21071	21725	21854	18337	18893	25015	26685	26567
12	17571	17597	15219	157355	139060	143844	17609	17089	17729	130635	119528	111331	23169	18210	22640	17580	21371	18744	26640	30128	26616
14	14185	19464	19647	158061	155754	155219	16878	14316	16148	121050	118317	120556	23799	19858	23954	19543	20998	18942	29925	29229	33496
16	15894	17669	16114	166430	148785	162365	17461	19590	20476	125023	127572	121455	23770	24274	25176	21142	23272	19382	28481	31831	31947
18	15495	17141	14667	179558	165681	167457	15594	14296	20939	128178	131343	115974	19949	22275	25177	25065	19743	22878	32120	33881	34407
20	15281	15629	13091	176628	183229	166900	18621	16588	18092	137059	115749	117333	21551	19818	29862	22846	21023	25149	31594	33184	34112
22	16529	15108	15151	205674	184259	181778	17500	18650	17548	130043	127024	119869	21886	22687	28546	22134	24250	21099	34851	30798	32648
24	15893	13076	13961	189663	169862	180690	17609	16562	17784	124629	121228	130584	27873	22288	32406	23997	22741	18669	35214	34393	35479
26	13610	14901	16100	199343	175340	198662	19965	19389	21397	137752	132758	134756	23257	24754	30594	23061	27096	22684	31611	37060	39508
28	14756	15784	16472	206406	196488	205805	14559	15367	18147	146486	126701	128087	30310	26023	27077	24270	24838	23173	33659	35276	34464
30	13087	15400	12325	210017	196730	195942	18298	17551	21176	132562	132723	128904	24629	25279	30909	21070	19860	23088	36475	36838	39495
32	14108	14687	17824	215421	200089	198795	18360	17126	19310	140951	130440	132925	26401	22394	27283	25889	21459	25981	41908	47526	42669
34	14592	20355	12445	215582	196275	206018	17884	19228	19234	138834	141111	135710	31371	26539	26574	25357	25509	27087	46854	37848	43430
36	16263	17220	15586	224621	217583	197829	19438	22255	18932	141810	128800	120372	28192	31776	26858	21146	21488	26977	44031	45599	41505
38	8532	16773	16420	220026	209551	208360	19327	16975	18535	133020	139550	138980	25124	24617	26494	24496	26085	28001	44100	42775	43223
40	15450	13353	14891	217598	215559	208629	21561	22174	19963	151068	132459	133284	22077	28306	31456	27472	25651	27315	43568	41792	44830
42	13949	15693	17766	216427	202908	212780	18614	17933	18675	140434	130807	139632	28356	25882	29870	24091	25326	21177	49522	43072	46952
44	18612	15982	15557	226115	212775	202122	22150	17448	23398	153521	127617	134971	24449	26437	31974	26418	22716	25632	40853	45674	47124
46	16540	16290	16292	225926	209328	205846	19131	22709	22239	147698	127242	144198	24827	28859	28949	23844	24351	26056	45640	43783	41088
48	14715	10587	16139	233785	212616	210924	23453	20585	22686	134706	127290	131818	30456	26451	26197	22280	24916	26993	47201	50265	47188
50	14655	15770	13719	235310	217843	224118	25538	24686	20110	143161	148846	133893	27124	27686	33653	26147	27139	25767	57101	45895	47744
52	13513	15922	11729	227269	214365	202782	21540	22125	26067	138144	147030	132769	28237	25292	32511	26516	22974	23736	48324	53918	54831
54	16457	13020	17299	231452	207928	217636	20925	22241	21099	144490	127266	143141	28036	25489	30700	28737	24808	28491	49430	53772	53711
56	12988	12611	18431	227693	211285	218788	19564	22993	23242	139002	137386	138593	27585	26340	27846	25123	29744	26972	46045	55470	49699
58	15866	15313	16290	233134	218938	240578	22525	25313	24876	152030	140672	131885	28618	26979	34910	27702	27185	24940	49549	50017	53361
60	15825	20114	17218	233240	227062	220244	25432	24606	22913	151049	139458	141078	29987	33216	30059	23300	22061	23956	52652	56811	60172
62	14316	11086	12975	241020	211887	222796	19797	27032	24092	137271	131237	155134	31021	29093	30133	25637	22332	24762	56555	52972	59345
64	15905	17670	14301	235401	214849	233030	22484	23584	24297	145007	136490	132446	32855	23653	30858	24882	28995	20541	52444	58676	61347
66	15366	14284	14080	242804	216629	221976	21171	20837	20755	153744	148982	151710	26607	29205	31282	24121	25208	26875	53395	57334	54203
68	16933	17408	14877	235787	210222	226640	20636	20367	25197	162141	136388	145124	33078	27187	31233	27893	24899	27489	52587	50763	56946
70	13271	15356	16413	241166	217875	214633	24571	26899	23075	145206	135116	141270	32769	30947	36981	27271	26534	28195	59096	59396	54158
72	18302	12284	13497	227202	219295	230950	21535	22714	29474	144626	129156	149215	32236	26455	34006	24197	25359	26912	61890	60293	58631
74	14789	13760	15384	247006	229442	221250	27279	25411	23523	155646	144996	139072	24748	35187	25590	25579	30993	32692	58048	63436	61893
76	12491	19582	15952	240012	233797	219169	25970	22425	22921	149812	139028	140927	32634	28291	32600	27961	30143	25028	57866	65310	56968
78	13980	14230	17040	223614	232108	220243	22146	22335	23494	155284	139103	142457	28879	28268	28385	26189	33225	26377	63532	63245	63520
80	15316	14444	13628	227009	228662	227692	29680	23815	23977	151606	140980	138817	30625	27627	29518	29900	24335	27440	69162	61217	61369
82	15439	16299	14062	225599	228550	226320	23828	24829	24511	147177	137534	150723	30651	29790	33499	26878	31843	28699	62289	53583	66177
84	14911	18988	12237	234646	218753	222717	26326	25588	22461	153801	147480	138789	29299	31285	35424	27564	29239	27470	62984	59752	63473
86	14747	19339	13165	242780	222982	234305	25501	29268	28411	153352	148441	138417	33522	31464	26180	27687	30074	32497	63463	68742	66218
88	13587	17879	12931	253057	220767	221565	23371	27535	28211	154647	140425	146279	27362	31677	29319	31509	28956	26338	69582	64552	68020
90	14444	14128	16905	227327	219906	231385	26271	25211	27041	152645	151686	147564	35821	28221	34001	30368	27556	35228	68446	64312	64059
92	13539	13508	15432	225919	222933	227856	22430	22306	24426	156637	156939	138727	31043	33165	32839	25018	28416	31957	65113	66363	74804
94	13925	15024	16774	235241	220456	224644	23093	26873	23442	154988	149317	148831	30973	27175	34051	23756	24313	31519	62610	69966	73749
96	15464	14194	14979	235524	219922	220393	26783	28574	32267	155106	148627	145706	27538	30209	27561	30148	33147	37535	67965	63959	66389
98	14786	18292	15128	211549	231798	225743	27591	27072	23654	155218	147483	149322	35283	30460	33861	34243	33788	35794	59703	60360	75828
100	13432	15329	19806	244973	219312	214351	20395	22826	28760	148866	142842	144938	28541	34070	31286	29700	27517	30068	67354	69231	77660
102	13413	15327	16952	218884	217427	221565	25559	27881	26205	155041	145760	138226	34495	28313	30076	24107	33786	28842	80453	68817	68408
104	16684	13313	14911	224295	213382	226290	24226	30406	31562	156670	148307	150950	35364	33221	33071	31637	31550	31100	74016	64682	70958
106	15584	13398	13147	255874	227887	222684	27173	29206	27948	147723	138611	146065	28886	36943	32932	30761	32152	29463	72239	69041	77430
108	15028	15157	18432	234144	234997	247088	27879	30546	28794	164869	154034	145819	26780	31687	30696	30140	29888	33115	73819	77129	73803
110	15958	15763	18090	240934	232158	228509	28587	30967	26794	156384	142800	147151	34183	34631	36053	25418	30977	29561	67731	74276	79167
112	15023	19349	17133	241903	239950	229880	36712	23878	27232	154116	143230	144327	29139	29956	31618	33451	31714	27214	76424	68939	75674
114	15108	15635	14662	237981	227241	237983	27424	25941	29943	156045	154289	153134	33234	31677	32517	32495	29204	29972	77743	84553	73609
116	9231	16600	13546	233817	223296	229028	28313	25963	32990	162905	142078	142145	31837	37160	34557	31370	29538	31160	79577	80073	77937
118	18089	14370	14691	230336	240318	237551	30423	28404	26104	157426	150382	151616	31851	31318	34011	28617	29236	34394	77670	81000	69810
120	17254	12529	15147	244176	224746	236764	26431	25053	28079	162100	138479	141205	29434	37189	33213	28166	32127	30087	82051	75646	75717
122	18495	15533	11688	237916	227567	224797	24326	31709	29878	153729	145421	145457	29789	28820	30614	29338	29531	36447	74982	77565	75973
124	14256	12423	14777	262422	238310	229125	31245	27667	27523	151782	143942	149120	30325	31592	30167	27204	29456	33816	85843	82142	81861
126	12916	12731	14158	237335	229306	246103	27753	28967	29248	162956	151329	145214	30791	35019	30066	32334	33234	33004	83007	78254	75975
128	11771	16680	14630	249856	236312	238301	26531	30461	30151	156784	143885	149346	34371	33859	30744	33036	28342	32022	84798	80452	76944
130	18985	17292	15402	232348	218756	236351	28873	29566	28096	161056	144637	137337	34835	30511	29137	26065	30722	32435	77376	77326	83310
132	16654	16798	14143	244833	245173	225865	28374	26557	27692	161607	144355	145042	38628	34314	29707	36690	34145	28288	80120	84338	82247
134	17219	15629	15935	241449	224741	222567	28374	30608	23720	165991	148387	149095	39367	32764	37135	31382	32940	33506	78080	86336	89915
136	15832	14182	15221	248694	222046	234579	26846	32090	28855	163214	148140	151952	34204	31363	33031	31903	31741	35732	79982	80988	91504
138	12682	15997	16413	235766	243769	226638	24906	28752	25423	165469	149753	146583	35181	28662	30638	30769	30244	34099	78967	86373	95567
140	17400	16020	15493	240298	250260	226115	31090	29465	23508	171630	151152	145595	30508	34575	33175	31222	29577	33231	92924	85341	83529
142	14915	17099	12804	237552	234878	227618	32248	31876	32816	157112	150586	140092	33109	30366	37789	33141	29400	29974	86518	85738	92367
144	13764	16930	16669	235740	227665	231733	30347	34534	27891	159610	154528	144828	28665	35256	35487	28212	34148	36295	88037	88115	82771
146	13104	14335	14760	248090	233066	240181	31633	30491	29689	165566	158899	153071	30944	26810	33774	35634	33918	34600	88681	85960	89180
148	12195	12317	11662	248801	241874	232831	28587	38083	27534	154069	146927	140530	33236	29339	33574	39364	31434	29296	91135	87096	93860
150	15632	13554	11757	252870	236847	230979	27259	32794	27277	153417	140388	152191	31589	34750	32069	33454	41247	35286	87089	85086	86384
152	14398	13530	14891	242532	222536	229182	34243	30010	31664	156164	147626	146228	31042	30961	34843	34033	35651	38059	87542	81808	98957
154	14715	15648	15336	246600	226721	231291	31556	31876	30663	155262	149848	163384	31038	33308	31097	37985	33684	35635	88107	80378	93289
156	14107	13858	16473	250887	228362	217659	28784	32395	29438	156911	154869	144415	34101	32231	32646	35475	34240	35384	87893	90436	90455
158	16319	15651	12974	243366	231292	217872	29542	30231	33979	161931	166540	150333	34465	33348	34071	32769	32645	28324	94755	94756	91306
160	14573	14397	14167	254636	232669	246557	33433	32614	28019	169938	161374	152867	31457	33691	29602	32636	34833	38723	89121	87127	98361
162	15401	15915	15842	250082	245898	233261	33221	33371	29534	161028	157384	140627	38174	31370	36711	36481	30361	35270	92779	94230	96523
164	14193	14317	18617	248169	228180	218145	30406	30918	31021	173232	150608	156746	36387	37421	33117	32727	37331	36890	93523	91301	92191
166	16951	18869	13925	244237	234107	234477	38767	38735	35238	170664	156052	143527	36222	34781	35159	39648	39211	31764	98067	95318	88776
168	14871	17460	11155	233064	214530	235184	29829	33480	29441	162839	150362	151325	33810	32368	31972	35065	34490	37626	100028	89294	98138
170	14054	22318	13951	244732	223097	228487	28545	30788	29531	156321	152361	148799	30486	33125	32976	36474	33162	34220	96010	101569	101515
172	18387	15190	18487	262827	231869	228200	35620	30098	30828	163241	157624	153022	33231	38827	31621	33424	39849	32366	89125	97901	101958
174	11595	13610	13467	237051	234323	225665	31171	31728	32518	149809	145965	146082	33978	44275	36557	33449	31789	33854	98733	99125	97649
176	13507	13334	14682	241687	234957	231920	32645	32895	30641	164213	148609	143517	33663	32604	30904	37537	35797	29847	97836	104204	94470
178	16281	14241	13196	256343	239891	228378	33781	30563	27700	165660	142881	149344	32271	32028	33855	33089	36338	32264	96087	102593	104507
180	12969	15564	17858	252843	228118	237568	31710	35925	29892	163386	148712	157721	30273	27294	33061	40717	30132	33323	102923	100155	98322
182	11819	18457	11507	252243	239791	222365	29790	32577	30057	157330	148595	153134	31234	40855	35188	35024	35648	38106	103493	95431	103093
184	13040	19398	13770	245488	225740	225433	28956	36156	38031	167067	159775	143297	31229	32755	37611	35850	34207	33417	98847	96469	100190
186	17712	12287	14296	239208	217806	226998	37447	29743	31695	168347	153214	156373	33154	35058	27274	31314	33849	34390	95981	101071	98680
188	14554	15229	14085	243048	244301	237318	34973	31753	30571	166768	151400	146748	31691	30007	33720	37219	33689	34111	100468	110745	101031
190	14934	18900	17301	241192	250448	227076	36135	30156	30340	171035	154674	150363	35023	32766	33871	35624	32853	36233	94968	102137	99511
192	14622	13985	13725	237658	244056	233522	33299	32716	29733	168972	148751	147368	36905	35203	35989	37416	37462	35523	88860	102827	107496
194	13159	15391	13004	247607	241385	231222	35164	32507	35734	165457	150537	150904	34648	34016	27111	34277	32822	37004	94734	109070	105089
196	13731	12795	14732	242556	245524	226275	33321	32654	33013	181019	140939	166690	34440	35482	33008	36706	36580	37870	106298	101559	106236
198	16007	15498	15936	238959	247821	233436	31329	27906	30088	159061	146443	150142	36204	35944	34143	36657	34040	40394	110492	101458	113083
200	16821	13002	15747	254452	239138	236351	29548	30428	31450	154132	158418	143405	27656	30926	29711	34932	37410	36254	116668	102825	95335
202	13740	15087	12835	248060	237473	232358	29186	33475	28061	161626	149473	151007	35204	26836	28389	36507	39688	34690	100863	102726	104744
204	15271	16163	15753	239406	227246	226015	30509	36389	28567	160170	153919	149758	34181	35995	33850	39292	39673	40652	96402	102831	116015
206	16097	14371	16939	233270	231447	220499	27957	32679	31754	156830	143954	151858	32096	29191	31494	37023	32039	35193	108217	109637	111940
208	18922	13832	11783	246658	222750	231379	34086	34465	32820	175665	169247	159641	32445	31440	39730	41149	39743	38169	103680	99927	108888
210	14044	14561	15337	256113	231808	232156	34204	30600	27609	165253	151455	149313	33780	30876	31976	40543	34514	38579	107067	105508	102230
212	11658	15910	13025	251742	232137	229490	34215	30083	29615	161002	145508	148523	34422	36159	27145	37898	34998	43175	107525	101732	111020
214	15063	19660	14629	239878	222069	217398	33765	30229	33933	172242	165619	148682	35023	34811	32700	39976	37186	33766	113611	115867	106864
216	17660	16133	11002	255721	229431	224452	28351	35956	33243	165698	150586	147842	32101	29201	32947	40846	41627	36125	101191	109133	109731
218	11546	14389	18678	241402	233886	233371	33446	33109	31280	172718	156051	147196	36518	31621	35926	40684	37428	36903	112780	104702	113485
220	16179	15501	16805	248958	222155	235537	28900	31945	28651	161360	143819	144828	30190	32554	34089	41048	36396	37706	110213	100813	118303
222	13409	12755	14286	248185	245637	226973	33305	30139	33144	165318	152991	147701	29378	26894	35952	40175	36106	39572	107461	111834	111079
224	15975	16441	15385	237258	232530	239638	33164	36298	31333	165398	145147	152910	32855	30936	34786	39432	40365	38704	111439	114124	119297
226	13784	21030	15426	246064	230851	232899	39774	32459	34178	155442	157832	151843	29904	37399	29959	35057	34247	43141	105142	110908	111463
228	15187	15882	14868	246806	227005	221134	33363	33368	34928	165365	161504	155509	42676	28900	31531	36312	38940	36432	114412	123942	120772
230	13586	15475	15435	255500	231658	214103	30250	33894	31213	168360	152866	152271	36799	35161	33785	38519	35782	39651	113605	113646	123479
232	14185	16038	17321	230465	233555	240012	32148	37457	29547	151994	149071	156661	35771	36001	30972	34222	38404	38903	122643	122104	114495
234	14734	16228	12610	253274	232791	241264	31442	35735	39797	168653	144648	148566	32374	38946	36395	40858	44472	44137	119861	114737	126507
236	11281	12034	15404	232713	248039	234306	29402	30988	33942	171770	158809	155305	32387	33275	36955	42629	38520	36496	117870	109488	123233
238	13159	16628	13495	242346	236949	238994	32169	35369	31635	166025	159052	154055	32887	26515	32188	37853	42022	40648	107294	109695	120172
240	15765	12907	14584	257941	235920	228024	37766	32196	33979	164508	155747	156844	33384	34494	32542	36049	37084	44337	108429	116364	112611
242	15969	14602	13877	269913	241713	238905	34763	30209	29713	168878	160880	144896	32149	35577	34754	35587	39455	41007	124821	109942	116084
244	15439	11775	17088	256413	238818	241576	30136	34006	29405	159933	163433	157660	31746	36998	35519	37741	34718	40759	116385	115604	119442
246	15070	18586	13060	262015	230505	247758	32736	34710	27270	165082	145881	159550	31735	30749	32573	42881	40460	42940	119538	125859	120370
248	13402	15411	13695	247036	237101	225348	33369	33582	36035	157743	152813	155440	37176	31625	33813	39653	36440	37666	107095	115349	121779
250	14283	14278	16109	257133	227287	236521	32442	33223	30170	158629	152591	159682	32291	30569	34527	46897	40995	38616	115026	117864	119236
252	12356	15020	15088	271592	223407	229863	34321	33811	35668	153145	144406	163771	35916	33348	36639	40064	42681	37458	119333	120069	120188
254	12665	13917	10654	256229	242202	231602	35474	32177	34326	164686	146514	147412	38206	28598	33802	46219	39870	34537	108951	117931	131390
256	11935	17418	16379	234515	234419	231496	35562	31118	29928	159849	155973	154685	37666	36707	28926	40796	44181	38722	128516	125146	108808
258	13194	15651	16533	257467	245938	231486	37263	33442	30660	161698	146741	158415	37464	31307	39048	35942	37315	41773	112032	122720	123530
260	14037	14634	16501	255179	240465	221950	38210	32816	33334	159057	161025	145103	27664	33292	34588	36172	40034	39242	122274	120521	128333
262	14772	17630	14340	235251	238963	223289	29253	31167	33791	169758	149186	158705	32566	29570	35644	39187	39155	36729	121414	123372	120283
264	16542	12024	14568	251935	229022	234012	39803	30501	28076	162723	156922	154284	30466	31606	33156	42149	41739	46492	127056	117493	126855
266	15532	15314	13836	250579	236599	225273	34965	32543	29185	173066	150105	141684	35453	31350	29815	43892	39859	35608	118620	132802	117861
268	15556	12723	17947	242421	242590	236909	32656	31573	32007	180113	162877	139923	36851	36465	33497	35654	44446	39887	126810	121143	124075
270	14010	17507	14533	239423	246399	231544	35274	36161	33742	167106	156220	144911	35056	33507	31714	37283	44571	40058	128578	120773	128767
272	14749	15211	16567	241377	229972	233764	39021	38185	35159	166753	156759	159550	35476	29502	36099	39314	39539	38319	123534	126818	129438
274	15436	14389	17231	254362	256391	220734	32207	34568	28107	161390	149002	140222	33319	32626	34693	32063	43178	33289	117347	129973	132335
276	16772	11815	15211	241868	250938	231687	37152	32741	29648	177485	167560	149019	37455	31457	34041	36777	40162	41790	115983	127110	126915
278	16672	13162	13514	255657	243145	234823	42020	33452	31321	158800	140832	161570	39341	32155	31351	37123	41963	42993	127859	129002	133300
280	16721	16916	13825	248533	239985	227750	35667	33551	31490	167298	155671	156412	34771	31300	31085	39396	46471	35634	124672	116772	134106
282	15221	16249	13157	252607	241237	230986	31235	36759	32653	160374	165607	146488	33983	35778	36103	35660	40285	41098	115280	139323	123594
284	11532	16401	11915	244043	233349	227800	35723	32231	32377	166532	157781	151961	35603	35564	32311	44543	36269	39255	123252	117371	131134
286	17101	14033	19988	251946	225877	231747	36763	34808	33399	165366	141533	151227	36280	33566	31970	41110	39503	42552	130107	133785	133261
288	14267	18102	13486	262253	229570	225897	35766	31021	31191	165963	153619	143214	37935	27783	38488	43994	45454	44673	131215	130485	133087
290	13365	16762	17374	248563	231047	237679	33938	32184	37770	170279	156324	157494	33011	36445	29075	43282	44315	41372	122824	127961	124291
292	15926	17058	14883	255794	246263	222154	32078	33137	37302	164116	138386	156276	35344	32802	31740	40353	40391	43791	127313	137130	119175
294	12353	15791	14514	245817	237898	226248	29784	36045	37920	169839	154929	138206	31520	36559	33980	42068	44000	40883	120300	125329	122186
296	14514	16035	14635	251932	229981	227466	36407	32999	37130	167250	160901	140691	34431	36763	31364	40294	41801	37482	126863	127344	128880
298	14728	16422	18569	245554	231874	232544	34225	31889	32791	172798	157260	150130	31932	33329	31724	40804	48736	38680	122757	127400	133291
300	18670	14064	16039	251938	251772	236382	36143	32978	39862	165184	160337	151293	35142	31942	33277	44483	36660	39643	126889	125312	125894

## Sheet: Figure 4D
Time (minutes)	Commercial		Re-Purified
0	1.07857	0.063618	1.0605	0.204954
2	1.11251	0.098581	1.0185	0.099887
4	1.05456	0.072122	1.15591	0.207181
6	1.13314	0.094345	1.21508	0.142716
8	1.09521	0.166954	1.12787	0.159285
10	1.1684	0.071467	1.32467	0.135682
12	1.15516	0.16195	1.44525	0.17983
14	1.30522	0.090925	1.55759	0.142221
16	1.27144	0.070224	1.44616	0.161607
18	1.21955	0.132866	1.48344	0.18372
20	1.17549	0.13212	1.43281	0.140165
22	1.2385	0.066363	1.45662	0.137671
24	1.33405	0.084655	1.60665	0.206887
26	1.24339	0.051263	1.48514	0.223825
28	1.22309	0.036862	1.43051	0.060427
30	1.29765	0.147405	1.76213	0.155256
32	1.27958	0.098548	1.80151	0.227672
34	1.3175	0.083028	1.64371	0.185145
36	1.15158	0.065192	1.88383	0.280183
38	1.2268	0.134444	1.65557	0.113871
40	1.25597	0.117139	1.61851	0.083369
42	1.35813	0.109387	1.97674	0.225983
44	1.30235	0.178785	1.78759	0.192161
46	1.26087	0.068063	1.7577	0.123792
48	1.33908	0.07386	1.9498	0.199553
50	1.34554	0.109838	1.90682	0.233675
52	1.2608	0.109688	2.14504	0.218347
54	1.32969	0.082893	1.91273	0.178846
56	1.35108	0.05472	1.8477	0.234861
58	1.29406	0.10536	1.91573	0.131452
60	1.30095	0.137339	2.44724	0.192274
62	1.35245	0.137422	2.32187	0.210381
64	1.38649	0.130461	2.31754	0.435794
66	1.30646	0.082879	2.16435	0.143799
68	1.27821	0.030195	1.99669	0.169667
70	1.24767	0.125575	2.10549	0.12526
72	1.28358	0.099503	2.36457	0.141618
74	1.37759	0.10713	2.05432	0.272896
76	1.38613	0.092112	2.16696	0.259985
78	1.33537	0.112331	2.21815	0.311018
80	1.34696	0.094324	2.34769	0.292721
82	1.3055	0.091218	2.08246	0.284946
84	1.42508	0.047424	2.20959	0.10635
86	1.38747	0.107058	2.1984	0.196431
88	1.41658	0.067548	2.32888	0.226332
90	1.40843	0.069802	2.11286	0.27576
92	1.43034	0.105309	2.41571	0.347873
94	1.34136	0.086707	2.59241	0.473951
96	1.40877	0.098096	1.96681	0.225547
98	1.39628	0.101564	1.88674	0.269856
100	1.3651	0.233256	2.45454	0.221645
102	1.39631	0.070787	2.50969	0.482146
104	1.36629	0.177391	2.22359	0.152774
106	1.3911	0.115363	2.36761	0.172037
108	1.46966	0.17128	2.41297	0.152525
110	1.46279	0.074998	2.57311	0.327735
112	1.4765	0.041269	2.39272	0.283687
114	1.33858	0.104592	2.57339	0.2318
116	1.35661	0.045468	2.58056	0.091838
118	1.55724	0.07389	2.47683	0.31653
120	1.40863	0.157206	2.58258	0.209127
122	1.50396	0.17286	2.3975	0.308337
124	1.42814	0.082052	2.76146	0.316495
126	1.47601	0.131136	2.40673	0.114439
128	1.45059	0.067649	2.59308	0.241437
130	1.43259	0.180495	2.66764	0.317504
132	1.46211	0.182153	2.48888	0.330758
134	1.56866	0.137148	2.59978	0.205753
136	1.44437	0.102956	2.54059	0.259095
138	1.42443	0.106479	2.74315	0.31863
140	1.50691	0.141233	2.78415	0.227401
142	1.36284	0.113138	2.86033	0.220734
144	1.61891	0.125289	2.62453	0.346893
146	1.46115	0.159594	2.53304	0.08041
148	1.51212	0.073755	2.71835	0.444046
150	1.42274	0.11882	2.35081	0.26274
152	1.45517	0.062025	2.49025	0.280746
154	1.61746	0.084339	2.43955	0.233606
156	1.50083	0.126516	2.55744	0.065529
158	1.47461	0.133888	2.99577	0.250922
160	1.49747	0.082421	2.58597	0.281752
162	1.45311	0.120119	2.77668	0.270136
164	1.47067	0.124498	2.59018	0.187225
166	1.43058	0.161273	2.55065	0.332713
168	1.48345	0.122412	2.68201	0.203548
170	1.51656	0.142085	2.87989	0.168272
172	1.48382	0.135523	2.73558	0.365614
174	1.47732	0.087434	2.98215	0.101466
176	1.45555	0.094757	2.87369	0.366305
178	1.42667	0.04081	2.98145	0.229878
180	1.46562	0.050267	2.89329	0.457315
182	1.43853	0.10357	2.77645	0.176829
184	1.50993	0.094701	2.85585	0.116387
186	1.51209	0.083564	2.9706	0.16583
188	1.57086	0.085887	2.97321	0.232488
190	1.48204	0.087387	2.83274	0.179379
192	1.48267	0.127749	2.70997	0.275809
194	1.48343	0.1782	2.96719	0.280061
196	1.48201	0.079217	2.8257	0.091238
198	1.64055	0.089842	2.92583	0.301371
200	1.61327	0.063141	2.89907	0.315049
202	1.47274	0.194198	2.78066	0.197433
204	1.46703	0.110443	2.63548	0.255014
206	1.51171	0.125864	3.16334	0.235774
208	1.44703	0.204629	2.62466	0.150259
210	1.49296	0.120318	2.77029	0.234141
212	1.49511	0.079617	2.75932	0.319558
214	1.4933	0.096286	3.03207	0.284782
216	1.51715	0.095782	2.69865	0.236299
218	1.4604	0.08204	2.8776	0.199597
220	1.58379	0.055203	2.86	0.289747
222	1.50034	0.155374	2.85167	0.173086
224	1.60618	0.115687	2.91019	0.118268
226	1.57386	0.05737	2.91265	0.393403
228	1.48891	0.108301	3.21556	0.182815
230	1.46369	0.06496	3.07788	0.22003
232	1.63458	0.148591	3.22106	0.254227
234	1.53098	0.141418	2.78917	0.188031
236	1.51128	0.133132	2.98008	0.295979
238	1.56781	0.191185	2.79748	0.225701
240	1.50976	0.077613	2.87226	0.346429
242	1.59403	0.12421	3.02327	0.291464
244	1.5401	0.074697	3.10402	0.25418
246	1.48834	0.093156	2.89645	0.127039
248	1.47867	0.141962	3.0259	0.233287
250	1.58427	0.165197	2.78343	0.28599
252	1.49807	0.134644	2.99152	0.195322
254	1.57771	0.106806	2.97011	0.515285
256	1.64774	0.098536	2.93026	0.322033
258	1.54617	0.123031	3.11468	0.298886
260	1.52865	0.09534	3.21468	0.200956
262	1.56575	0.187541	3.17255	0.123534
264	1.57747	0.168673	2.84863	0.213564
266	1.47871	0.12354	3.09389	0.385368
268	1.55946	0.149479	3.10057	0.348155
270	1.61107	0.146951	3.10156	0.302356
272	1.59077	0.113372	3.2413	0.092949
274	1.61876	0.132825	3.49816	0.629987
276	1.55033	0.113301	3.11641	0.257772
278	1.51788	0.135668	3.19597	0.256061
280	1.53499	0.092665	3.09092	0.471434
282	1.54614	0.101314	3.23127	0.396199
284	1.59697	0.117791	3.09625	0.367216
286	1.45738	0.145859	3.22456	0.129227
288	1.535	0.133459	2.94351	0.056701
290	1.50297	0.144209	2.90827	0.118286
292	1.51519	0.070292	3.0804	0.261467
294	1.46743	0.096166	2.8973	0.123322
296	1.5384	0.092439	3.20369	0.178163
298	1.53924	0.144042	2.99055	0.390887
300	1.58073	0.15724	3.13029	0.307592

[truncated: 3 more sheets: Figure 5A, Figure 5B, Figure 5C]
